# Supplementary material for: Iodine/DMSO-mediated one-pot access towards 1-aryl-2-(pyrazol-5-yl)ethane-1,2-diones via a domino reaction from functionalized pent-2-ene-1,5-diones
Source: Royal Society of Chemistry journal article supplement (doi:10.1039/d3ob01997g), 2024-01-01

## Supporting Information

# Iodine/DMSO mediated one pot access of 1-aryl-2-(pyrazol-5-yl)ethane-1,2-diones via domino reaction from functionalized pent-2-ene-1,5-diones

Trisha Ghatak,<sup>a</sup> Chandan Shah,<sup>a</sup> Ismail Althagafi,<sup>b</sup> Nand Gopal Giri,<sup>c</sup> Mahendra Nath,<sup>a</sup> Ramendra Pratap<sup>a,\*</sup>

<sup>a</sup> Department of Chemistry, University of Delhi, North Campus, Delhi, India-110007.  
[Phone number: +911127666646; Email ID: ramendrapratap@gmail.com]

<sup>b</sup> Department of Chemistry, Faculty of Science, Umm Al-Qura University, Makkah, Saudi Arabia-21955

<sup>c</sup> Department of Chemistry, Shivaji College, University of Delhi, Raja Garden, New Delhi-110027, India

| Table of Contents                                               | Page no. |
|-----------------------------------------------------------------|----------|
| X-ray Crystallographic Data for compound <b>3m</b>              | 2-4      |
| <sup>1</sup> H NMR and <sup>13</sup> C NMR spectra of compounds | 5-51     |

## X-ray Crystallographic Data for compound **3m**

**Crystallization procedure (solvent evaporation method):** Slow evaporation of a saturated solution of **2m** in chloroform at room temperature produced red colored cube shaped crystals suitable for X-ray analysis. Single crystal diffraction data for **2m** were collected at room temperature with an Oxford XCalibur CCD diffractometer equipped with a graphite monochromatic Mo-K $\alpha$  radiation ( $\lambda = 0.71073 \text{ \AA}$ ).<sup>1</sup> Data reduction was performed with the CrysAllis-PRO.<sup>1</sup> The experimental data was processed and analysed using the software package Olex2.<sup>2</sup> The structure was solved with the olex,<sup>2</sup> solve program,<sup>3</sup> and by employing the charge flipping algorithm. The refined structure was obtained using the olex 2 where refine refinement package,<sup>4</sup> utilizes Gauss-Newton minimization.

The ORTEP diagram shows the compound crystallizes in a triclinic system having four molecules in the unit cell and shows one 2-methoxyphenyl ring planer with pyrazole and other is perpendicular to pyrazole. The C=O group and NH of the pyrazole ring forms an intermolecular hydrogen bonding (**Figure 1**). The hydrogen atoms were placed at the calculated positions and included in the last cycles of the refinement. Crystallographic data collection and structure solution parameters are summarized in **Table 1**.

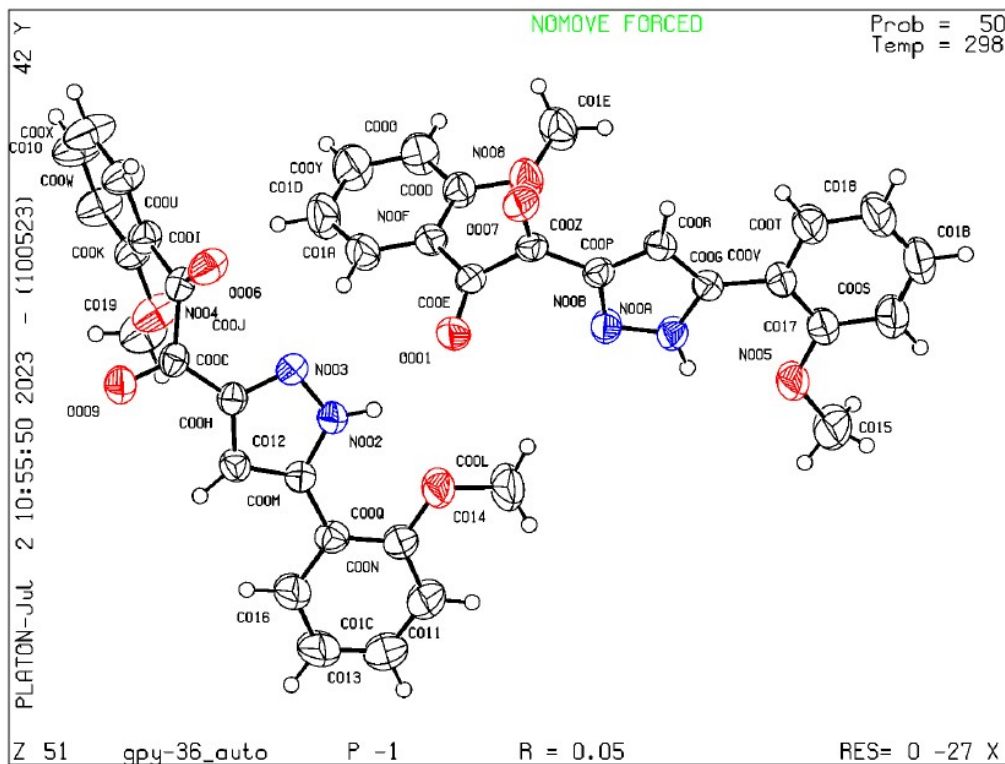

**Figure 1.** ORTEP diagram of **3m**; thermal ellipsoids are drawn at the 50% probability level.

**Table 1. Crystal data and structure refinement for 3m**

|                                        |                                                               |
|----------------------------------------|---------------------------------------------------------------|
| Empirical formula                      | C <sub>19</sub> H <sub>16</sub> N <sub>2</sub> O <sub>4</sub> |
| CCDC                                   | 2278961                                                       |
| Formula weight                         | 336.34                                                        |
| Temperature/K                          | 298                                                           |
| Crystal system                         | triclinic                                                     |
| Space group                            | P-1                                                           |
| a/Å                                    | 8.3993(5)                                                     |
| b/Å                                    | 19.2977(9)                                                    |
| c/Å                                    | 11.0438(6)                                                    |
| $\alpha$ /°                            | 90                                                            |
| $\beta$ /°                             | 107.107(6)                                                    |
| $\gamma$ /°                            | 90                                                            |
| Volume/Å <sup>3</sup>                  | 1710.86(17)                                                   |
| Z                                      | 4                                                             |
| $\rho_{\text{calc}}/\text{cm}^3$       | 1.306                                                         |
| $\mu/\text{mm}^{-1}$                   | 0.093                                                         |
| F(000)                                 | 704.0                                                         |
| Crystal size/mm <sup>3</sup>           | 0.3 × 0.2 × 0.2                                               |
| Radiation                              | Mo K $\alpha$ ( $\lambda$ = 0.71073)                          |
| 2 $\Theta$ range for data collection/° | 6.602 to 62.242                                               |
| Index ranges                           | -10 ≤ h ≤ 11, -27 ≤ k ≤ 25, -14 ≤ l ≤ 15                      |
| Reflections collected                  | 20045                                                         |
| Independent reflections                | 8249 [Rint = 0.0375, Rsigma = 0.0538]                         |
| Data/restraints/parameters             | 8249/0/459                                                    |
| Goodness-of-fit on F <sup>2</sup>      | 1.039                                                         |
| Final R indexes [I ≥ 2 $\sigma$ (I)]   | R1 = 0.0492, wR2 = 0.1181                                     |
| Final R indexes [all data]             | R1 = 0.0958, wR2 = 0.1348                                     |

|                                             |            |
|---------------------------------------------|------------|
| Largest diff. peak/hole / e Å <sup>-3</sup> | 0.16/-0.19 |
|---------------------------------------------|------------|

## References

1. Oxford Diffraction Ltd. CrysAlisPro, v. 1.171.33.49b, 2009.
2. Dolomanov, O.V., Bourhis, L.J., Gildea, R.J, Howard, J.A.K. & Puschmann, H. (2009), *J. Appl. Cryst.* 42, 339-341.
3. Bourhis, L.J., Dolomanov, O.V., Gildea, R.J., Howard, J.A.K., Puschmann, H. (2015). *Acta Cryst. A* 71, 59-75.
4. Sheldrick, G.M. (2015). *Acta Cryst. C* 71, 3-8.



# <sup>1</sup>H NMR and <sup>13</sup>C NMR spectra of (Z)-3-(methylthio)-1,5-diphenylpent-2-ene-1,5-dione

(1a)

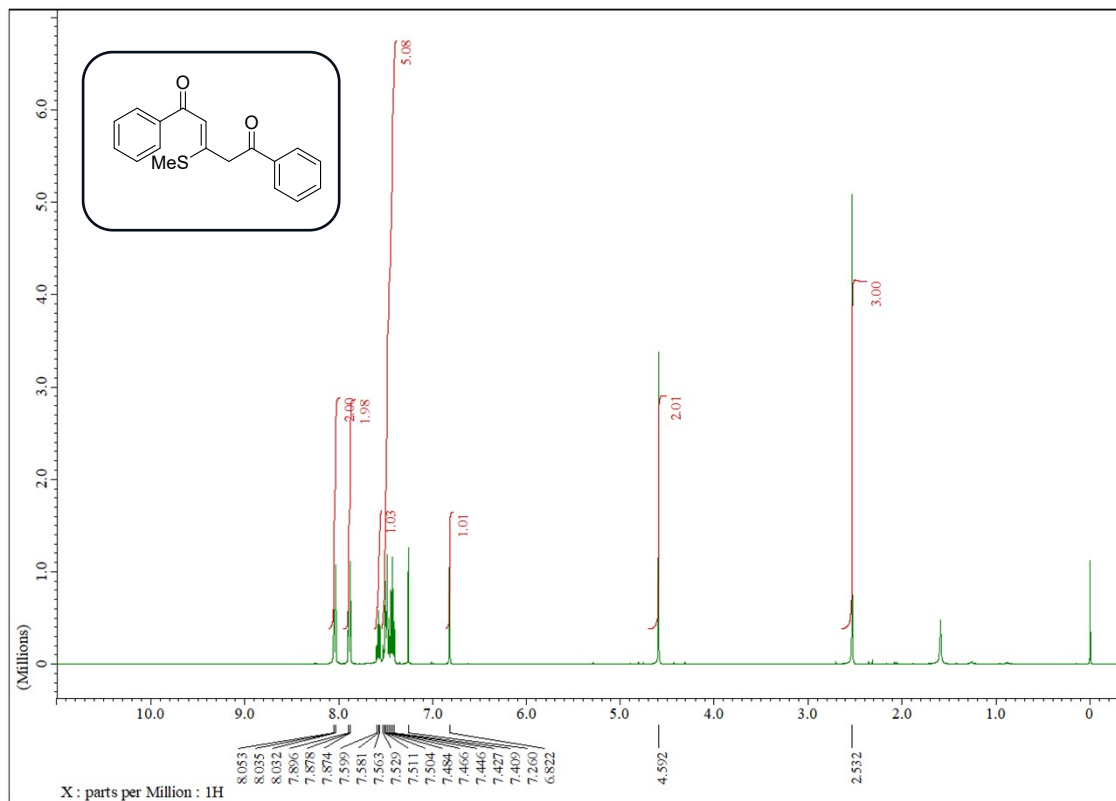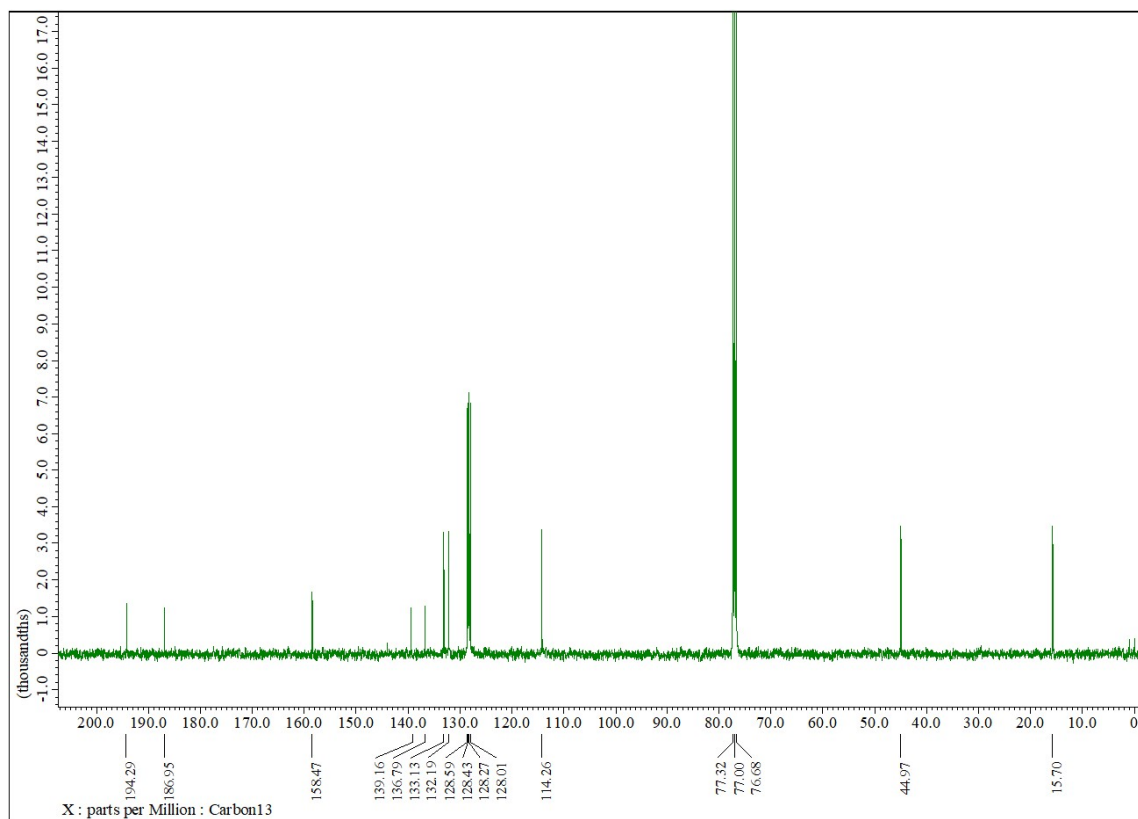

**<sup>1</sup>H NMR and <sup>13</sup>C NMR spectra of (Z)-1,5-bis(4-bromophenyl)-3-(methylthio)pent-2-ene-1,5-dione (1b)**

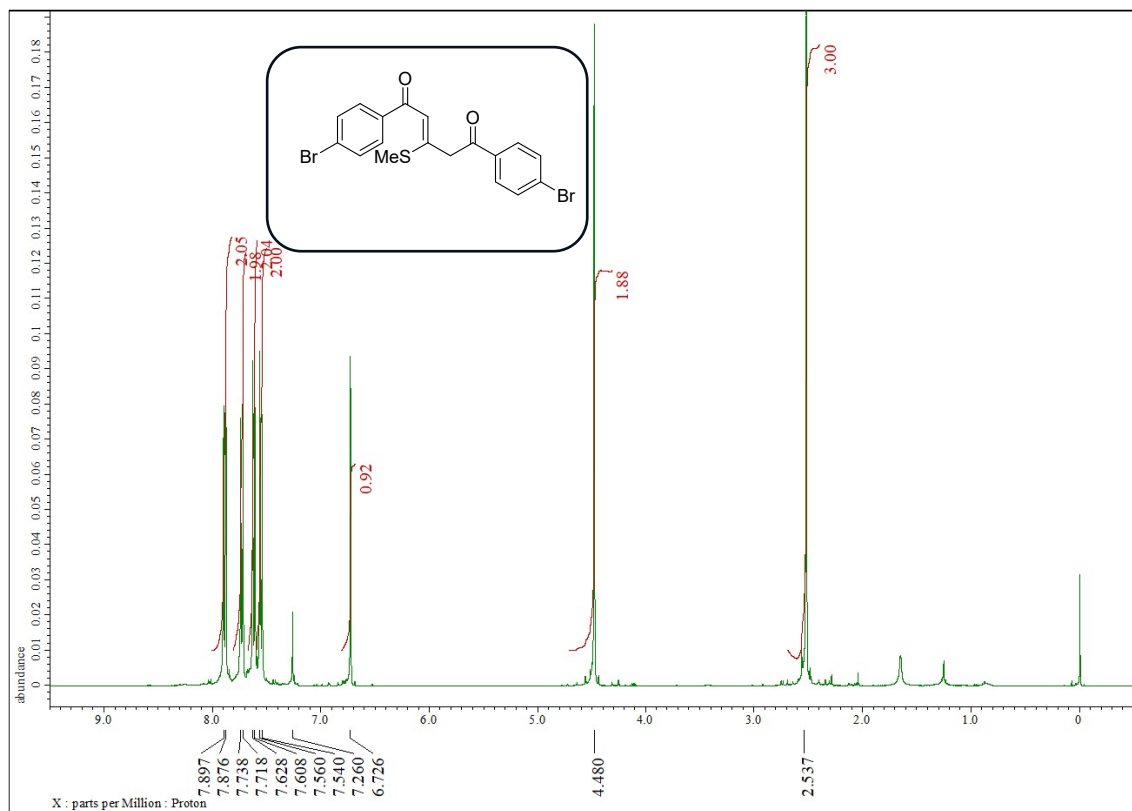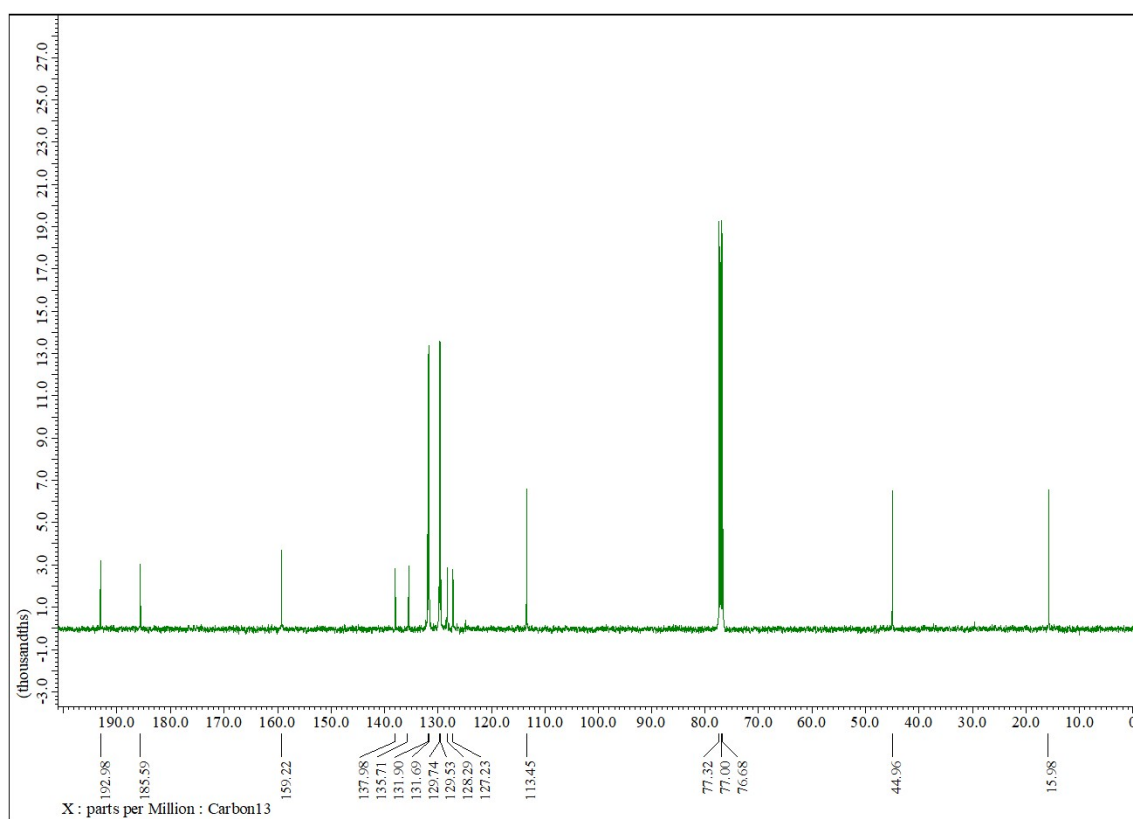

**<sup>1</sup>H NMR and <sup>13</sup>C NMR spectra of (Z)-3-(methylthio)-1,5-di-p-tolylpent-2-ene-1,5-dione (1c)**

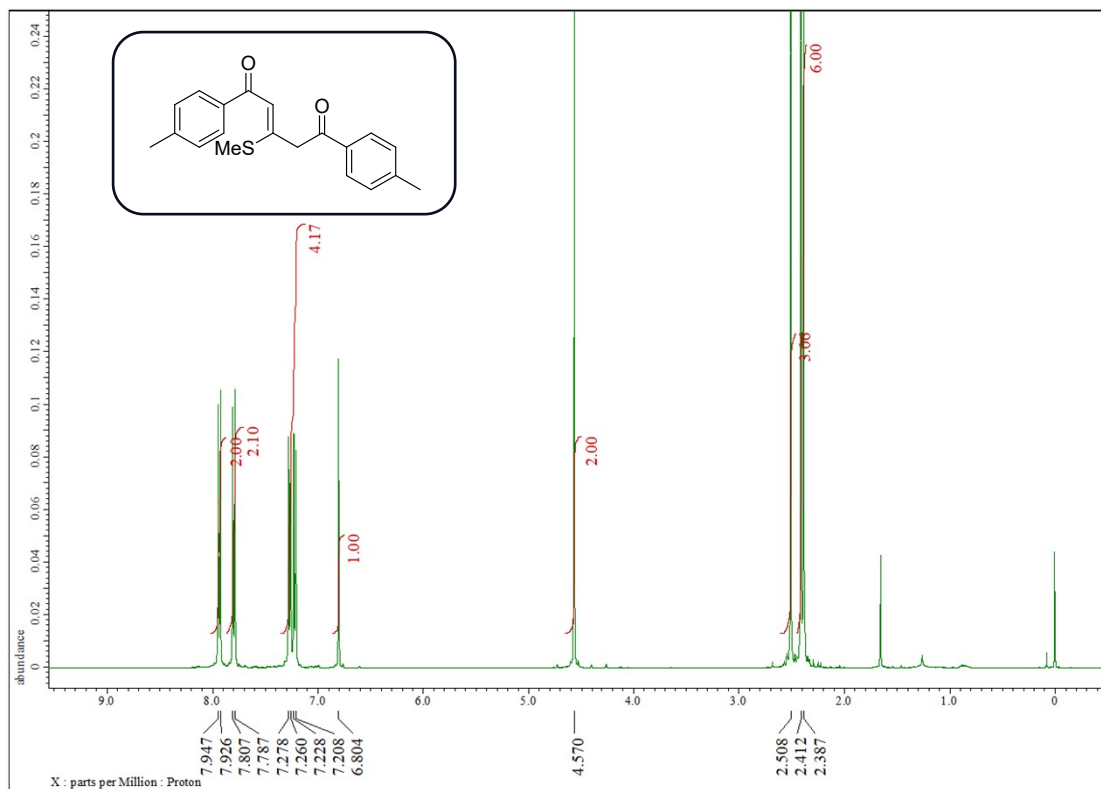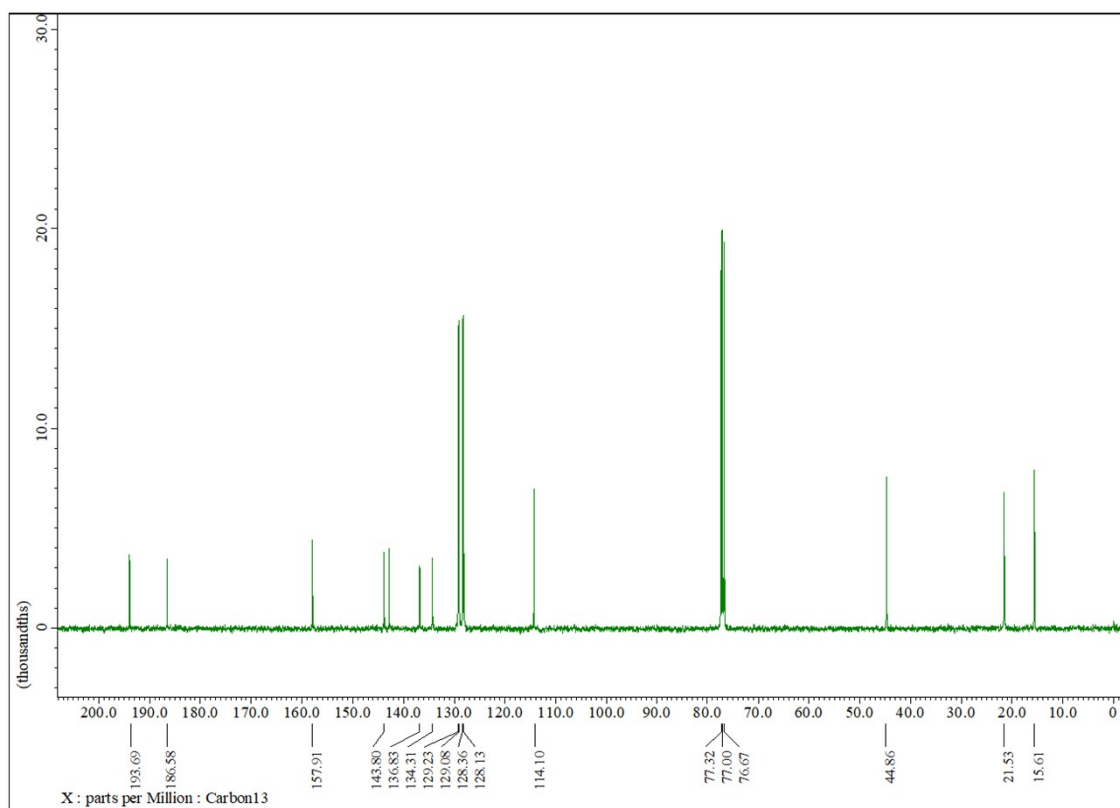

**<sup>1</sup>H NMR and <sup>13</sup>C NMR spectra of (Z)-1,5-bis(4-fluorophenyl)-3-(methylthio)pent-2-ene-1,5-dione (1d)**

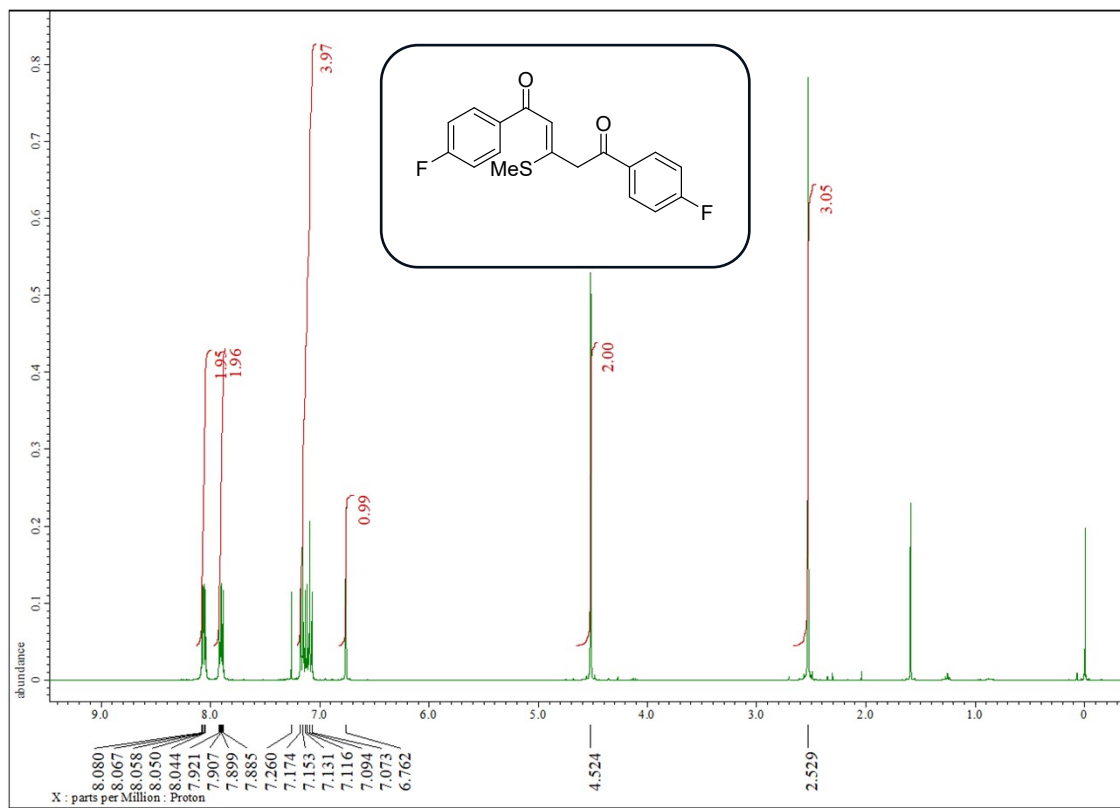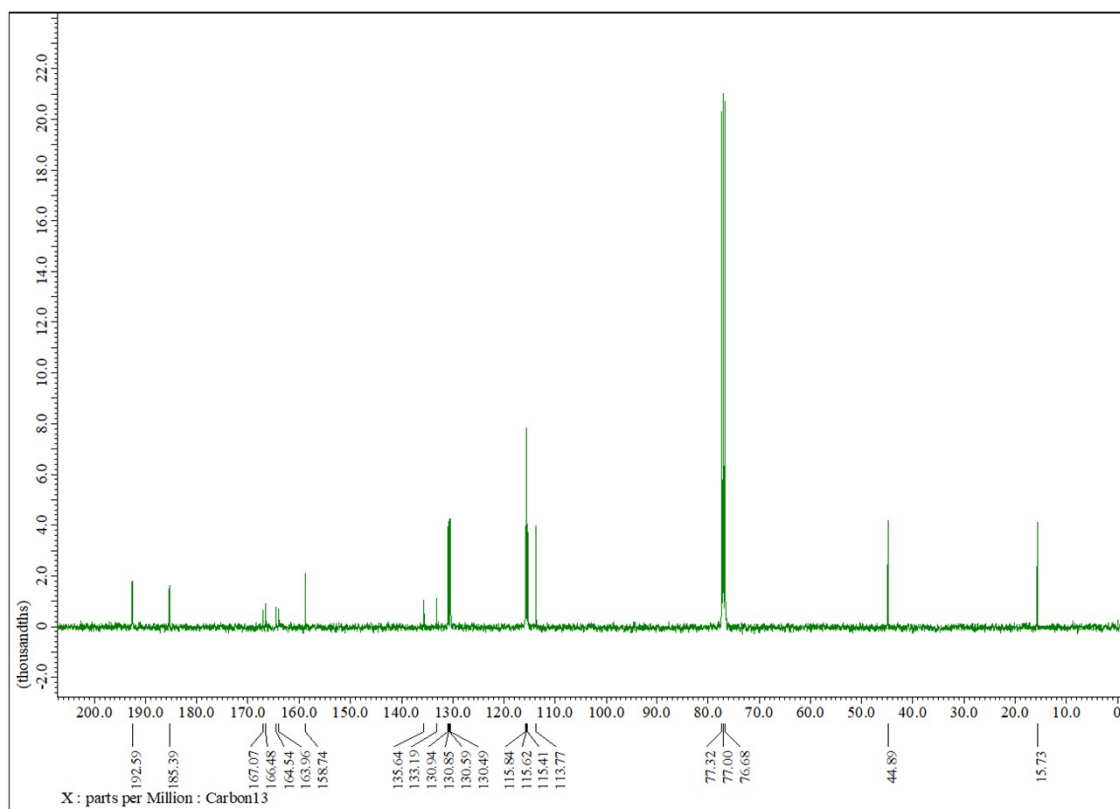

**<sup>1</sup>H NMR and <sup>13</sup>C NMR spectra of (Z)-1,5-bis(4-methoxyphenyl)-3-(methylthio)pent-2-ene-1,5-dione (1e)**

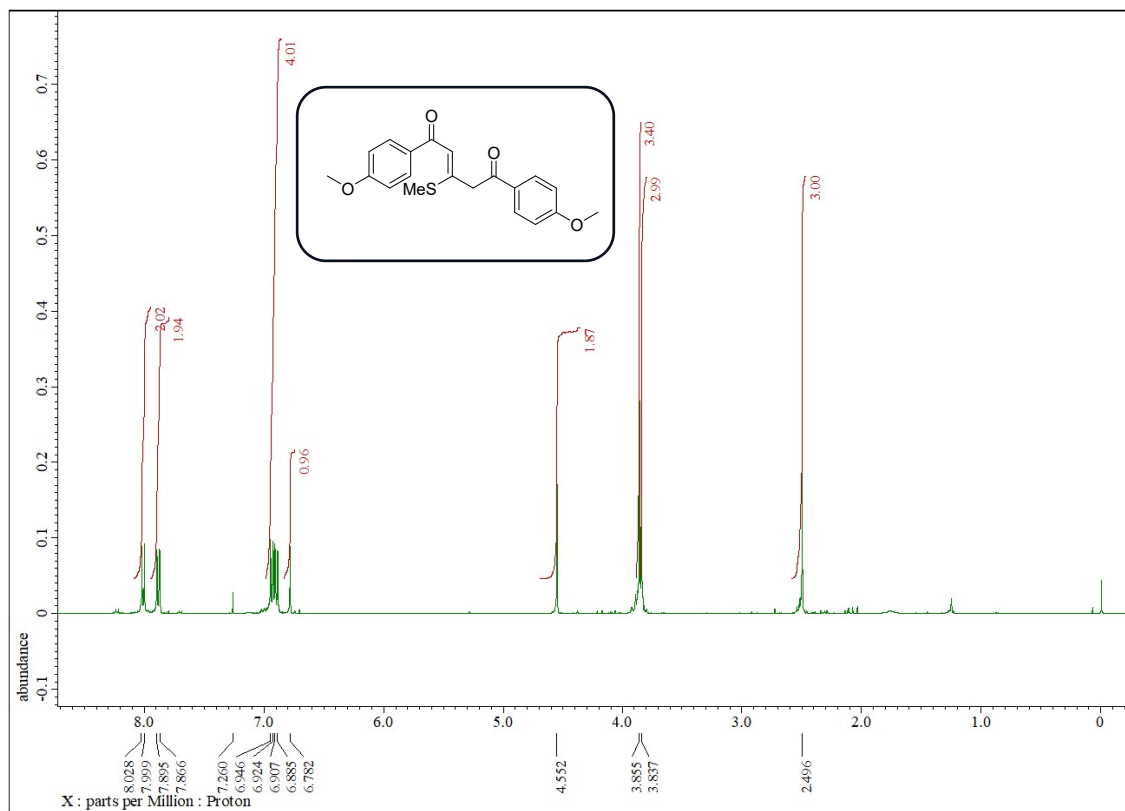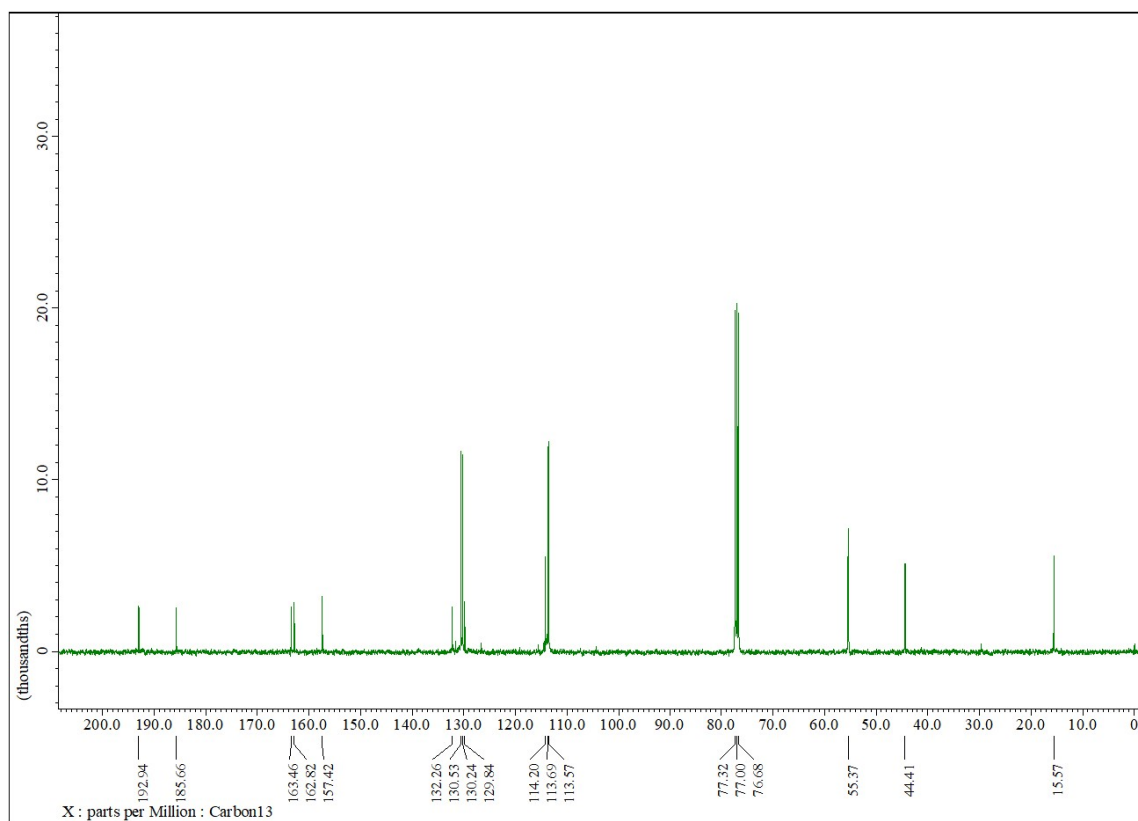

**<sup>1</sup>H NMR and <sup>13</sup>C NMR spectra of (Z)-1,5-bis(4-chlorophenyl)-3-(methylthio)pent-2-ene-1,5-dione (1f)**

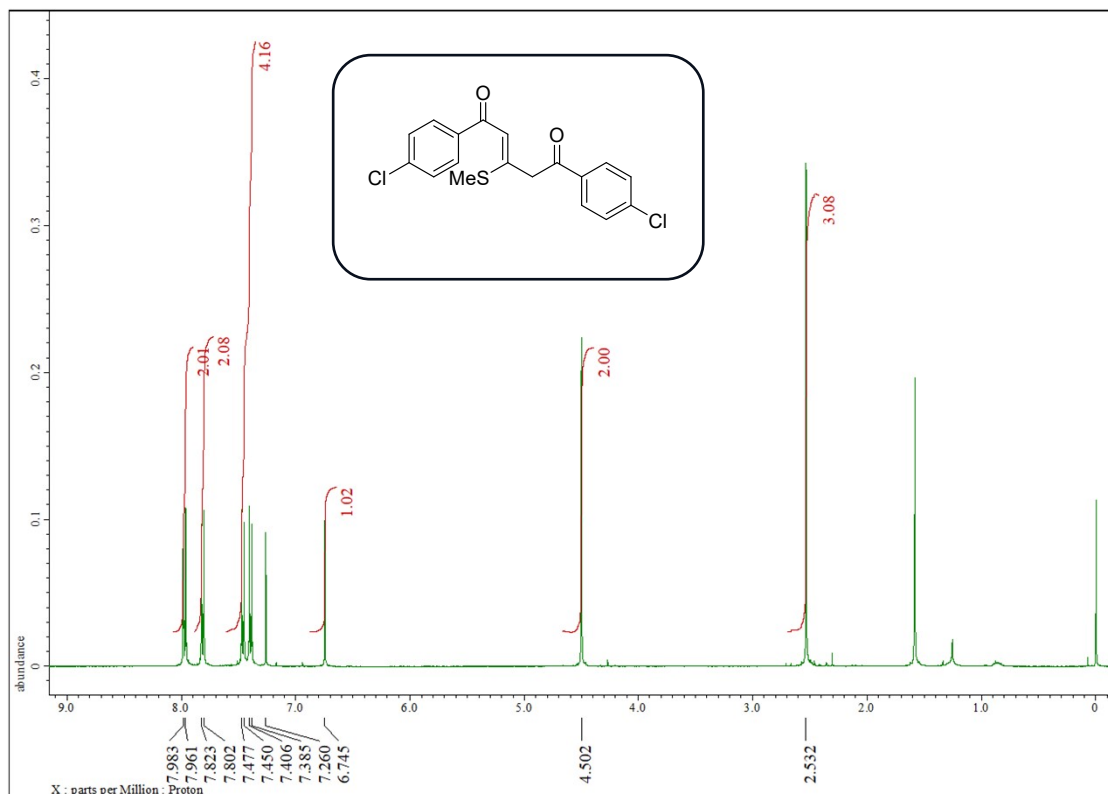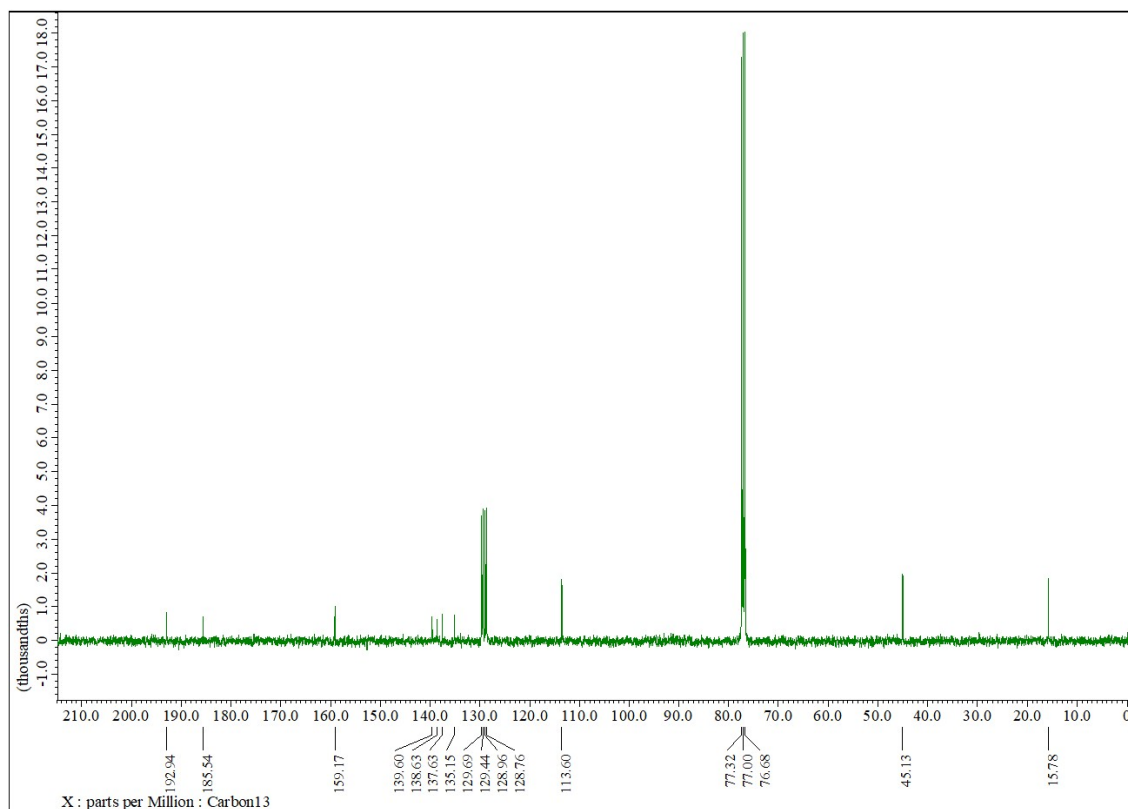

**<sup>1</sup>H NMR and <sup>13</sup>C NMR spectra of (Z)-3-(methylthio)-1,5-di(naphthalene-2-yl)-pent-2-ene-1,5-dione (1g)**

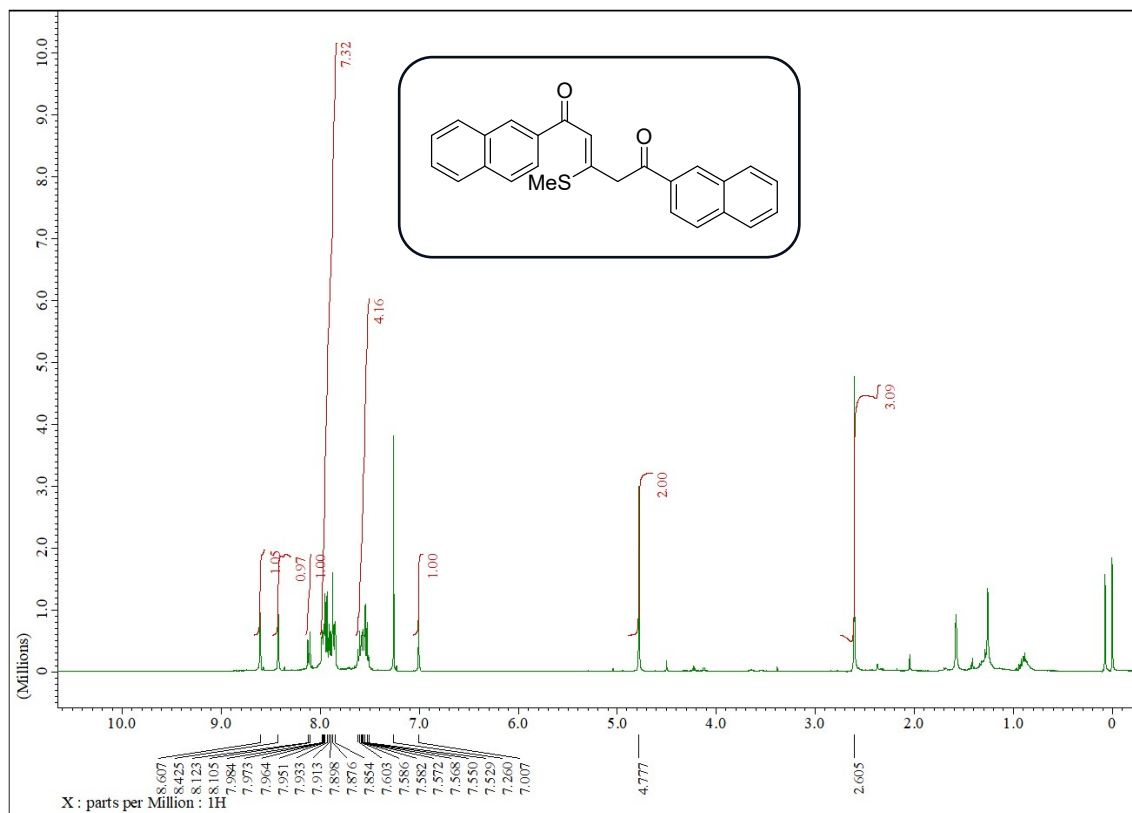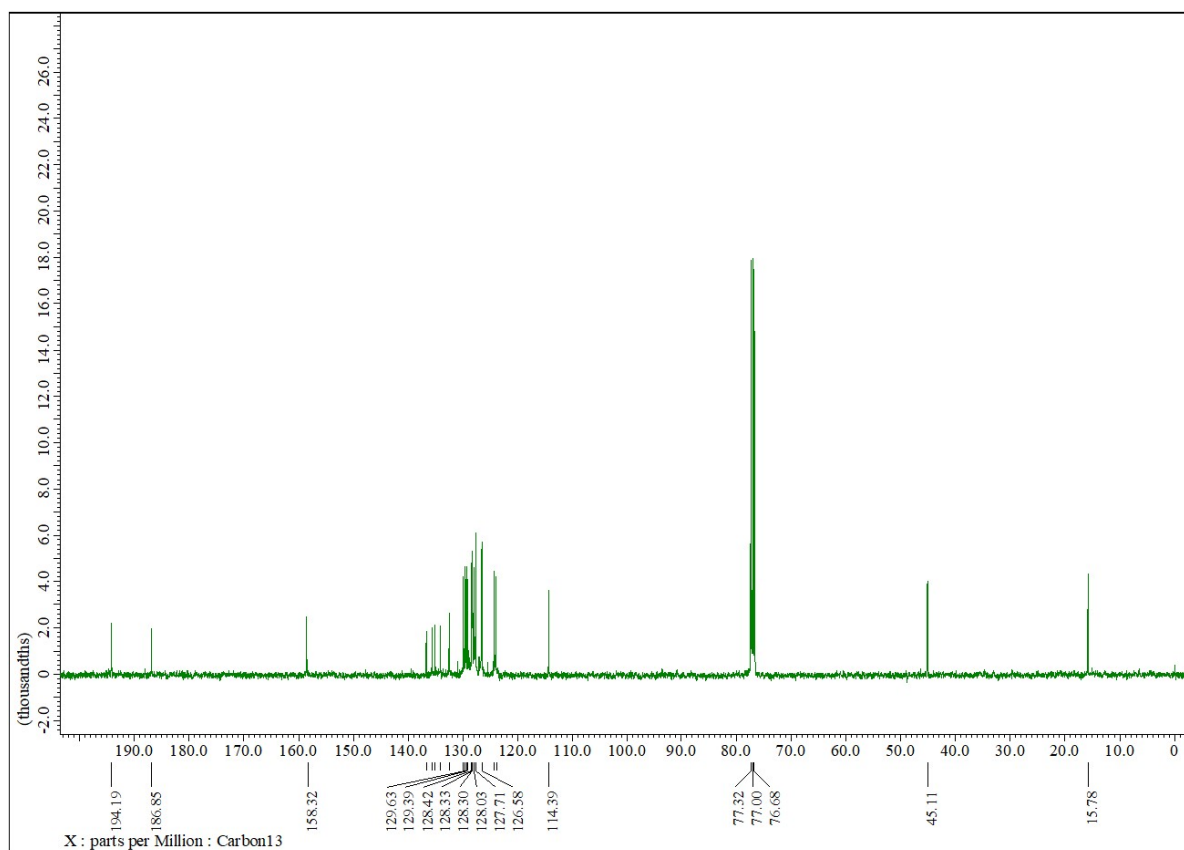

**<sup>1</sup>H NMR and <sup>13</sup>C NMR spectra of (Z)-1,5-di(furan-3-yl)-3-(methylthio)pent-2-ene-1,5-dione (1h)**

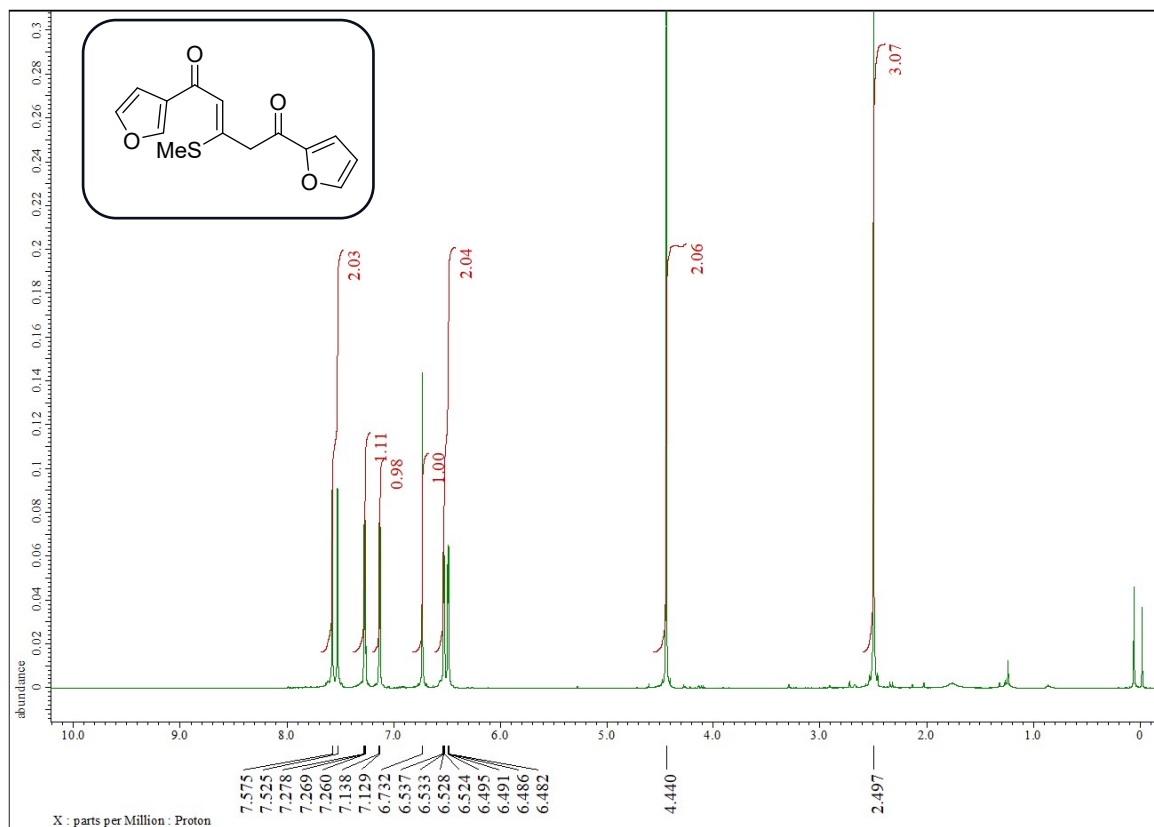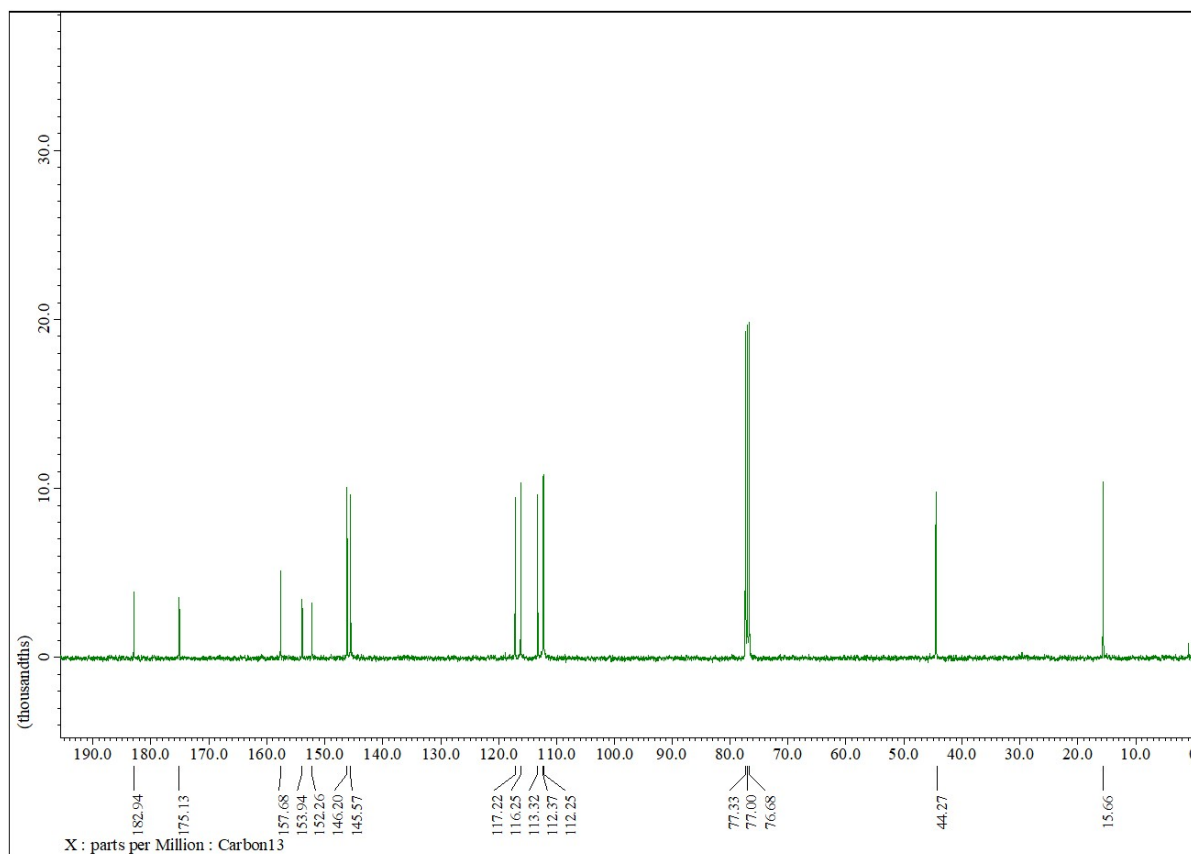



**<sup>1</sup>H NMR and <sup>13</sup>C NMR spectra of (Z)-1,5-di([1,1'-biphenyl]-4-yl)-3-(methylthio)-pent-2-ene-1,5-dione (1i)**

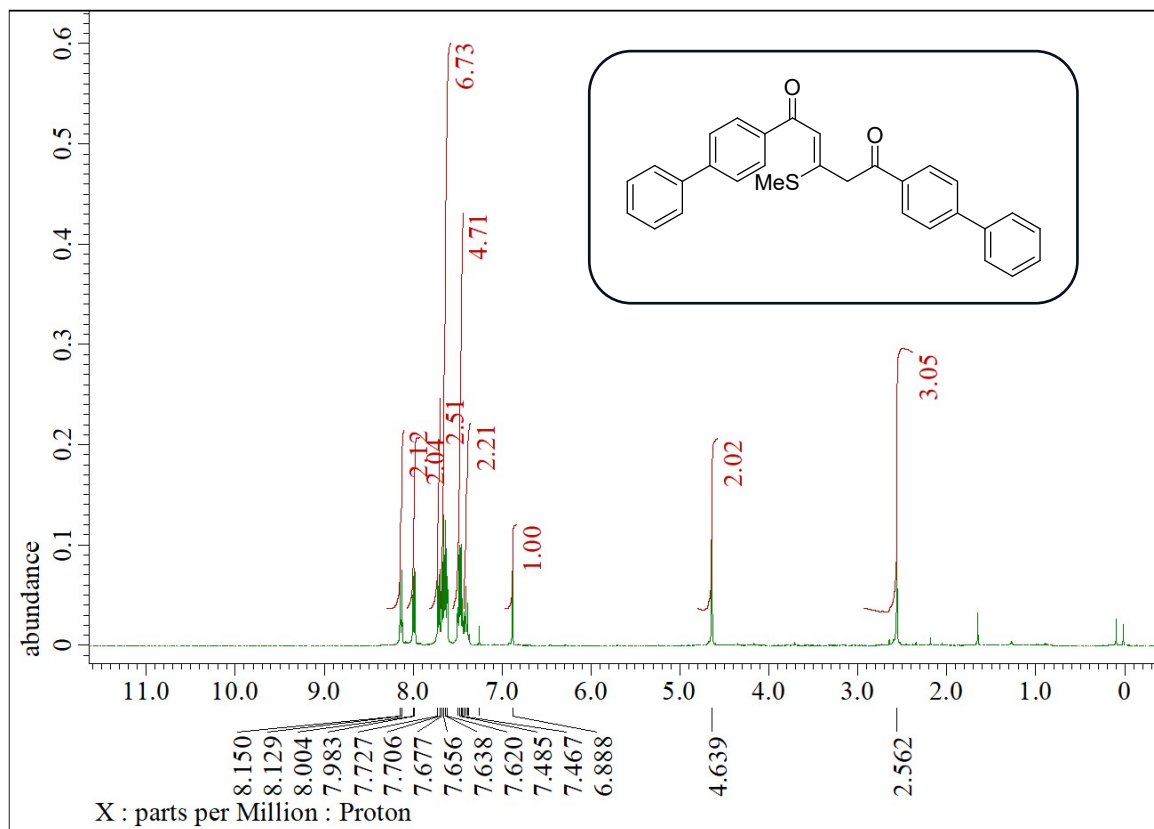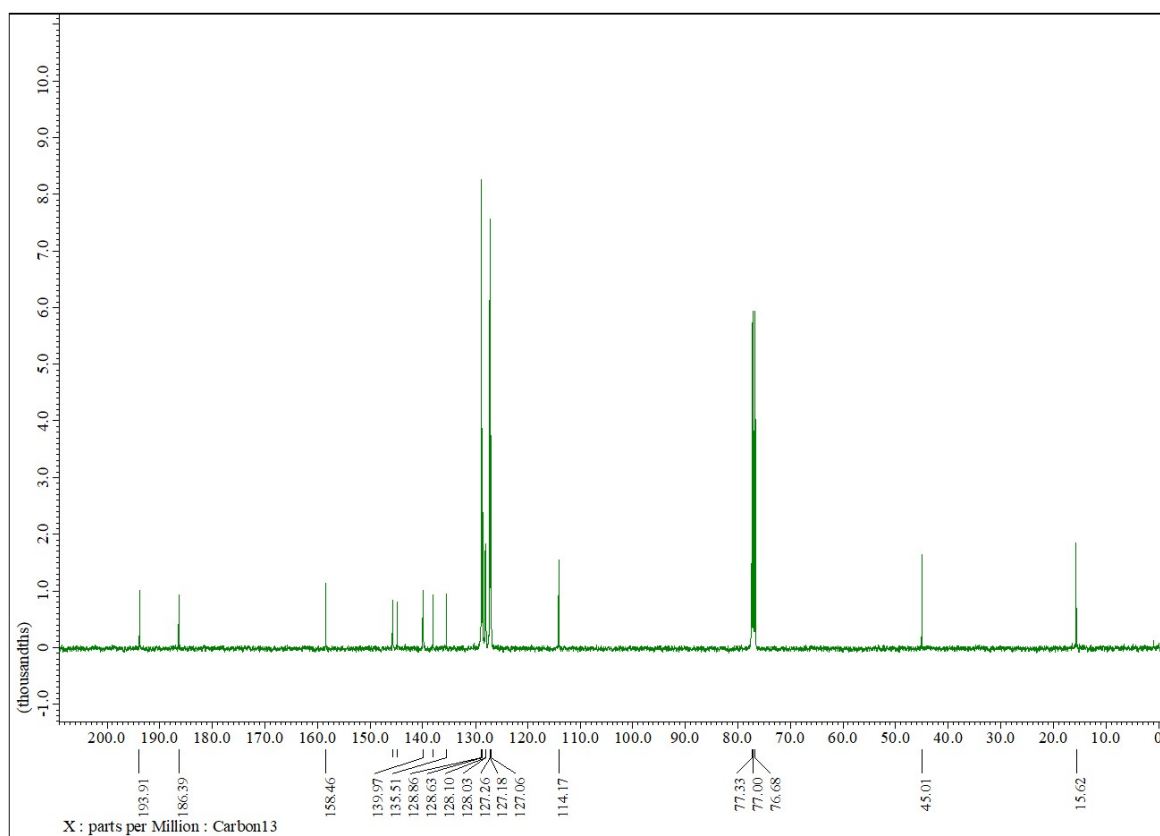

**<sup>1</sup>H NMR and <sup>13</sup>C NMR spectra of (Z)-1,5-bis(2-chlorophenyl)-3-(methylthio)pent-2-ene-1,5-dione (1j)**

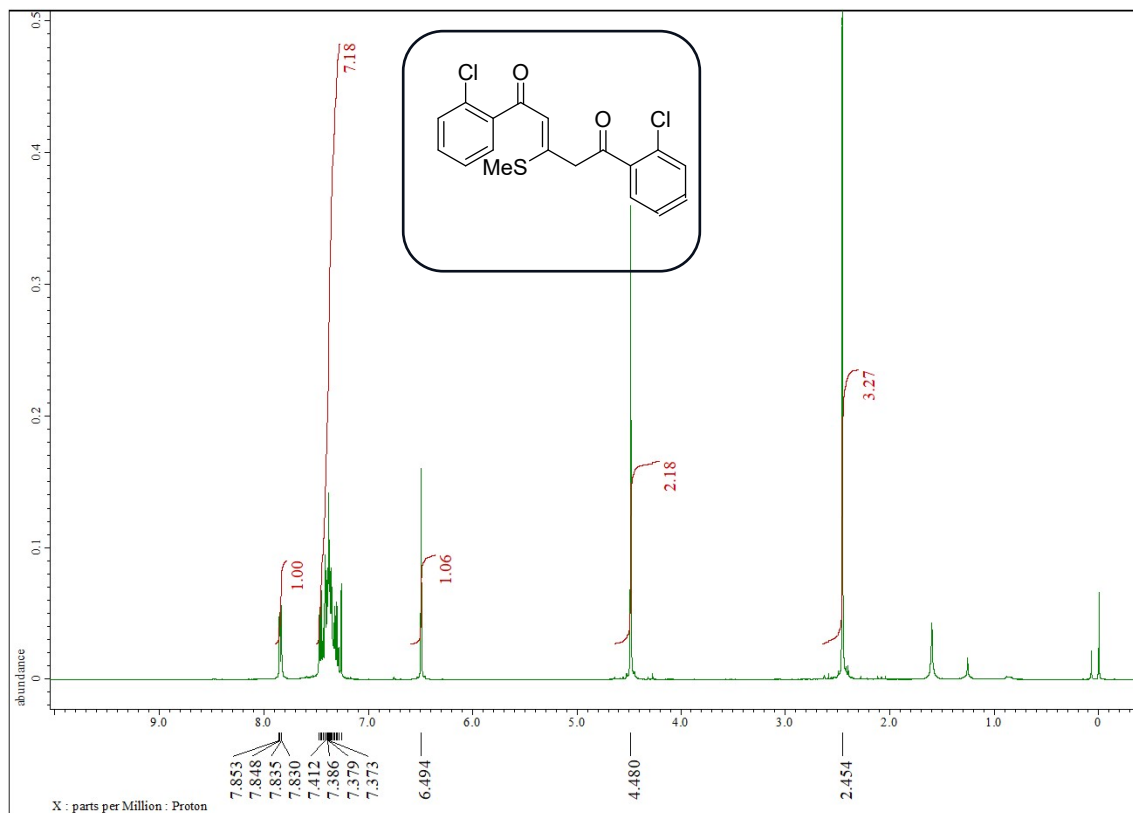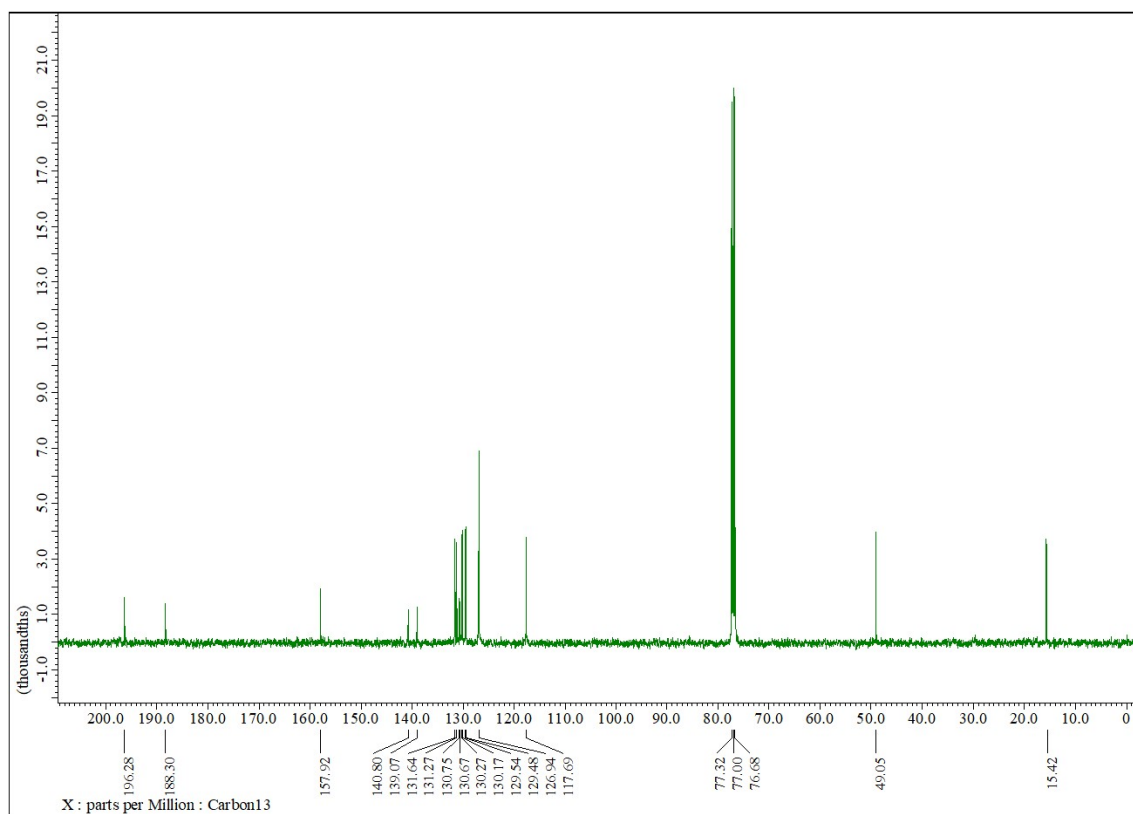

**<sup>1</sup>H NMR and <sup>13</sup>C NMR spectra of (Z)-3-(methylthio)-1,5-di(naphthalene-1-yl)-pent-2-ene-1,5-dione (1k)**

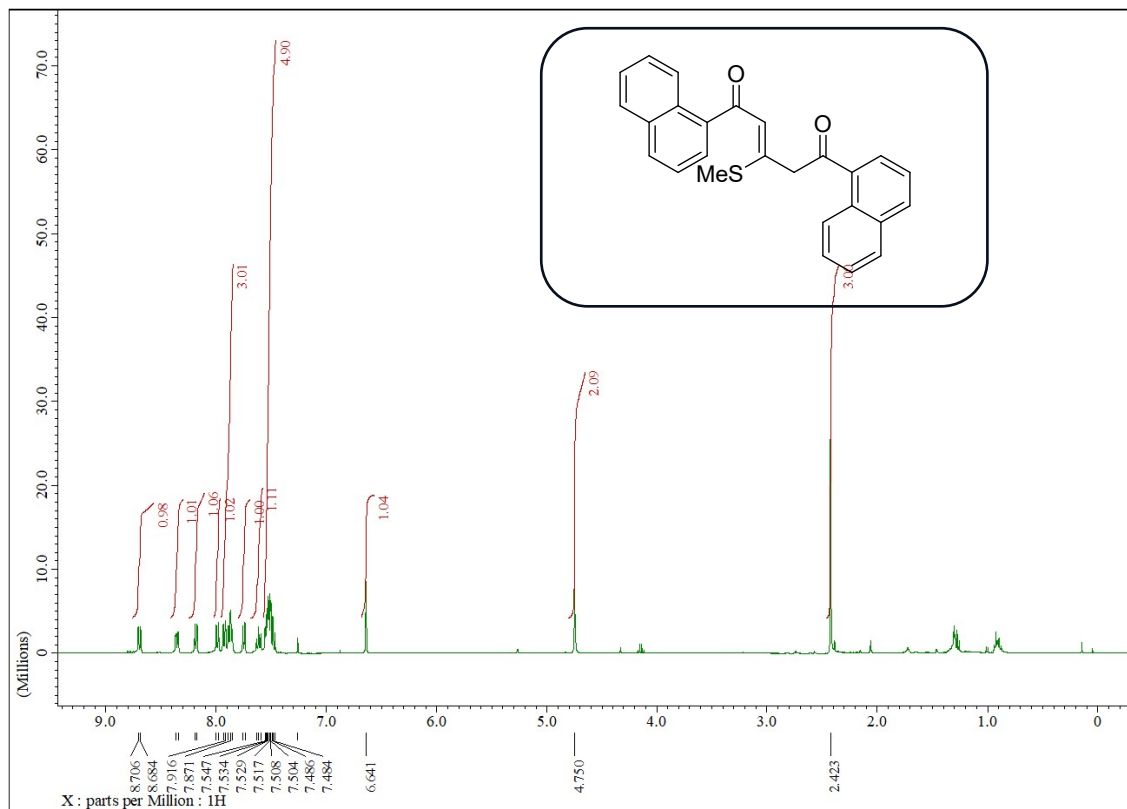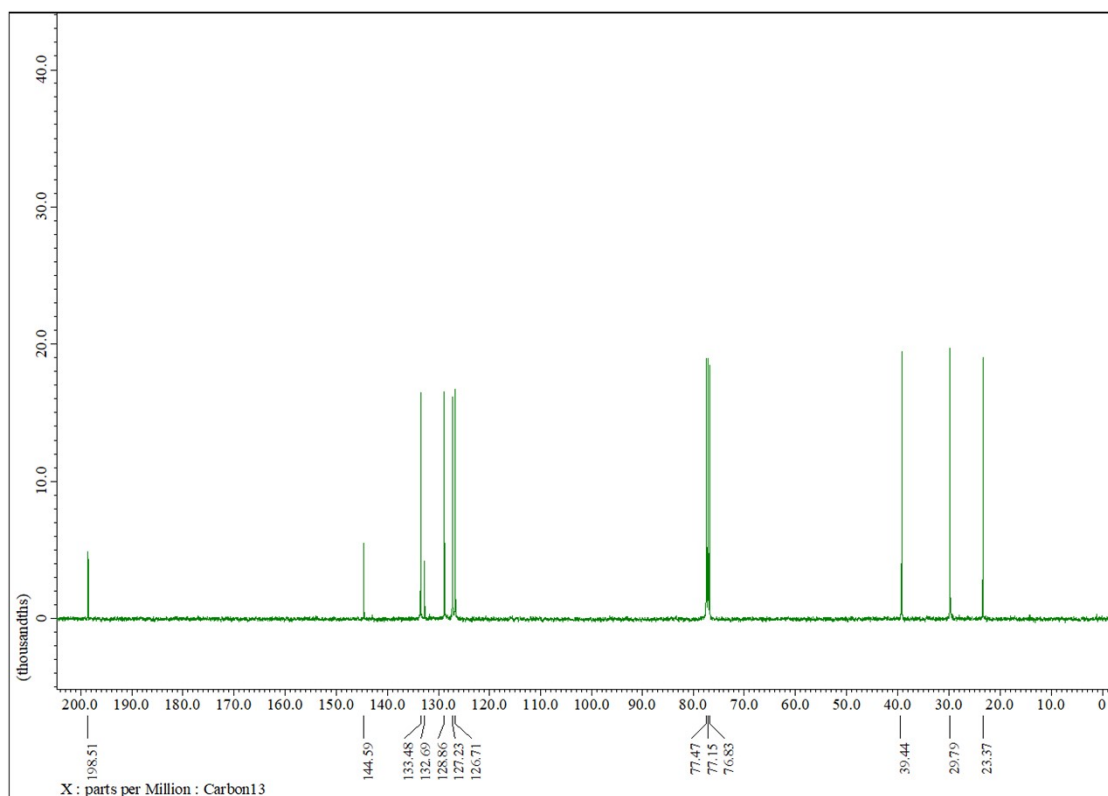

**<sup>1</sup>H NMR and <sup>13</sup>C NMR spectra of (Z)-1,5-bis(3-bromophenyl)-3-(methylthio)pent-2-ene-1,5-dione (1I)**

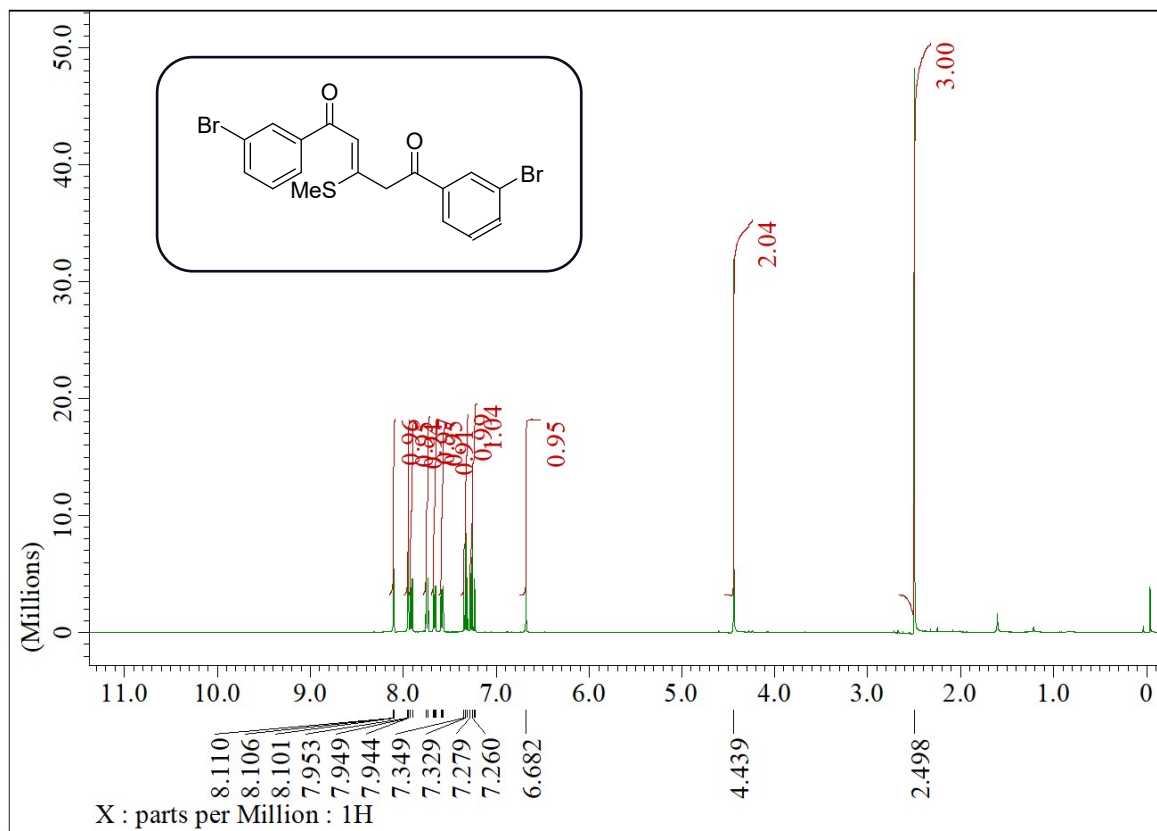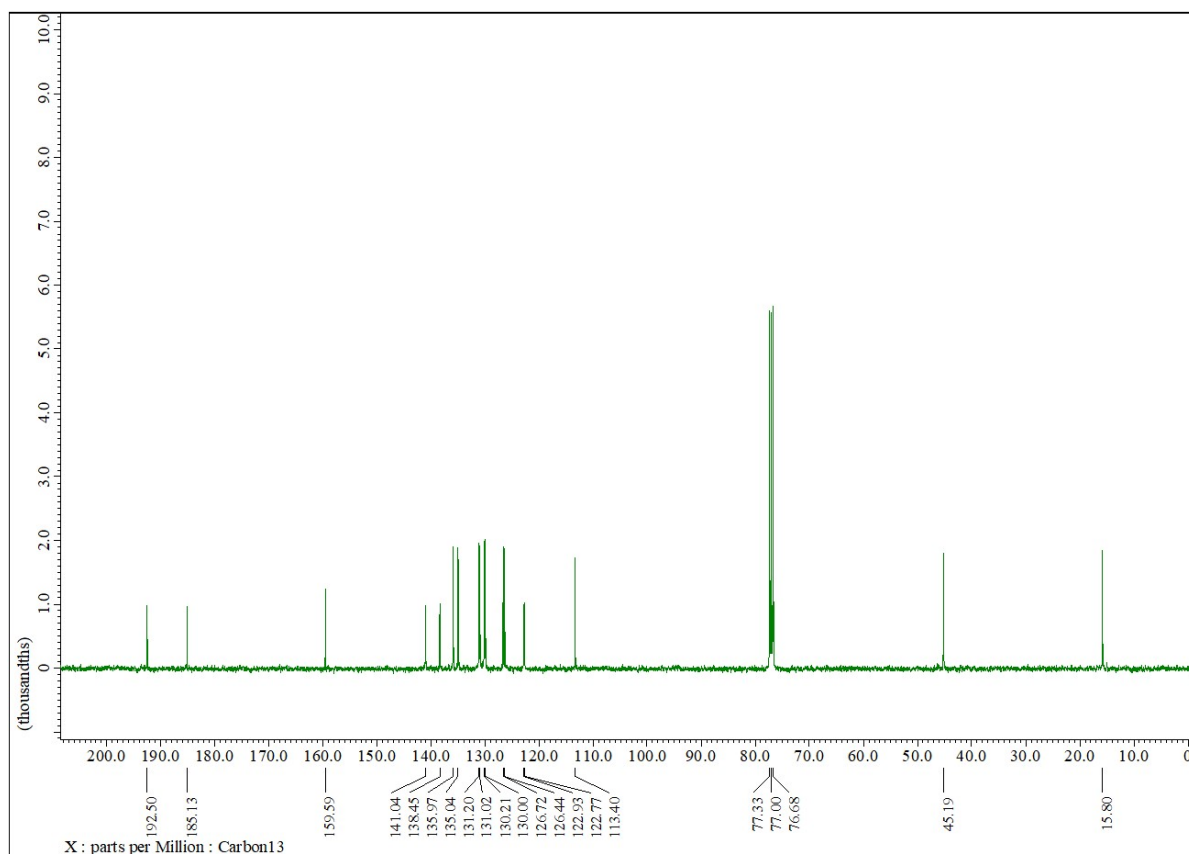

**<sup>1</sup>H NMR and <sup>13</sup>C NMR spectra of (Z)-1,5-bis(2-methoxyphenyl)-3-(methylthio)pent-2-ene-1,5-dione (1m)**

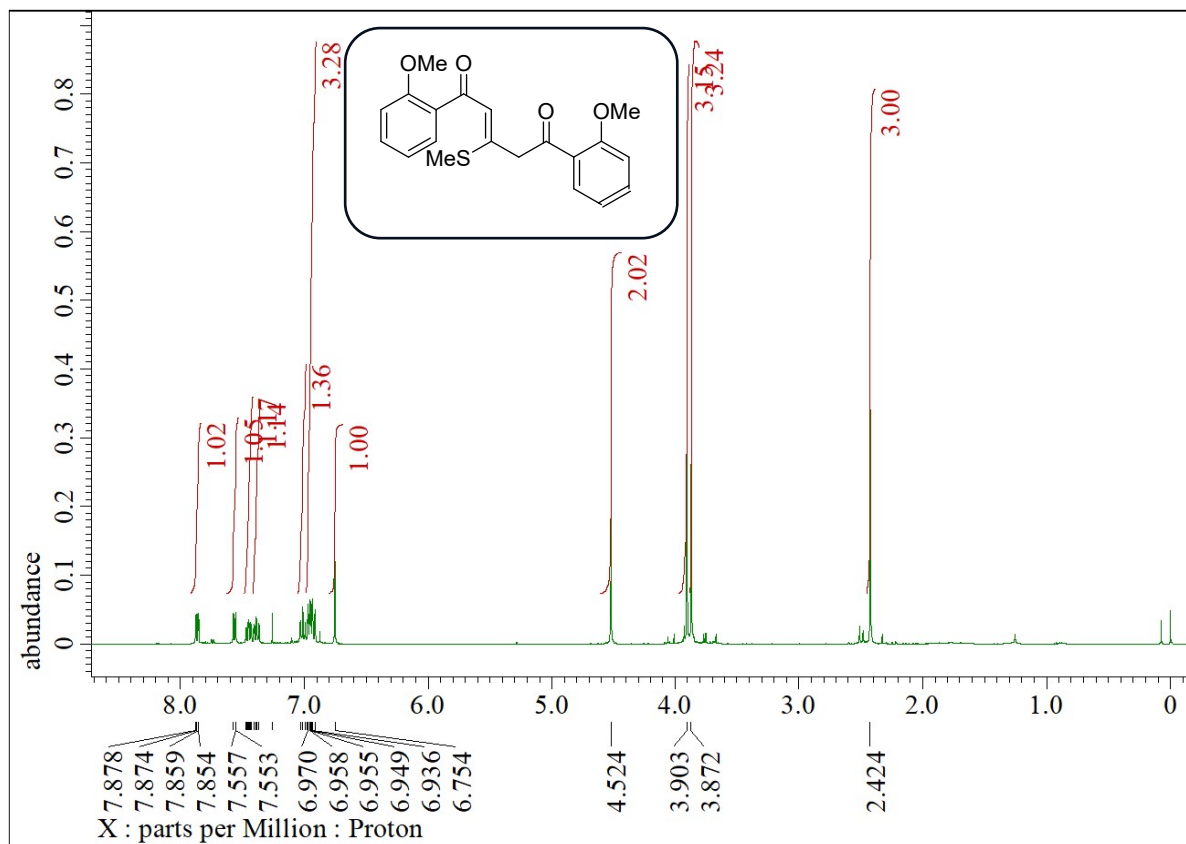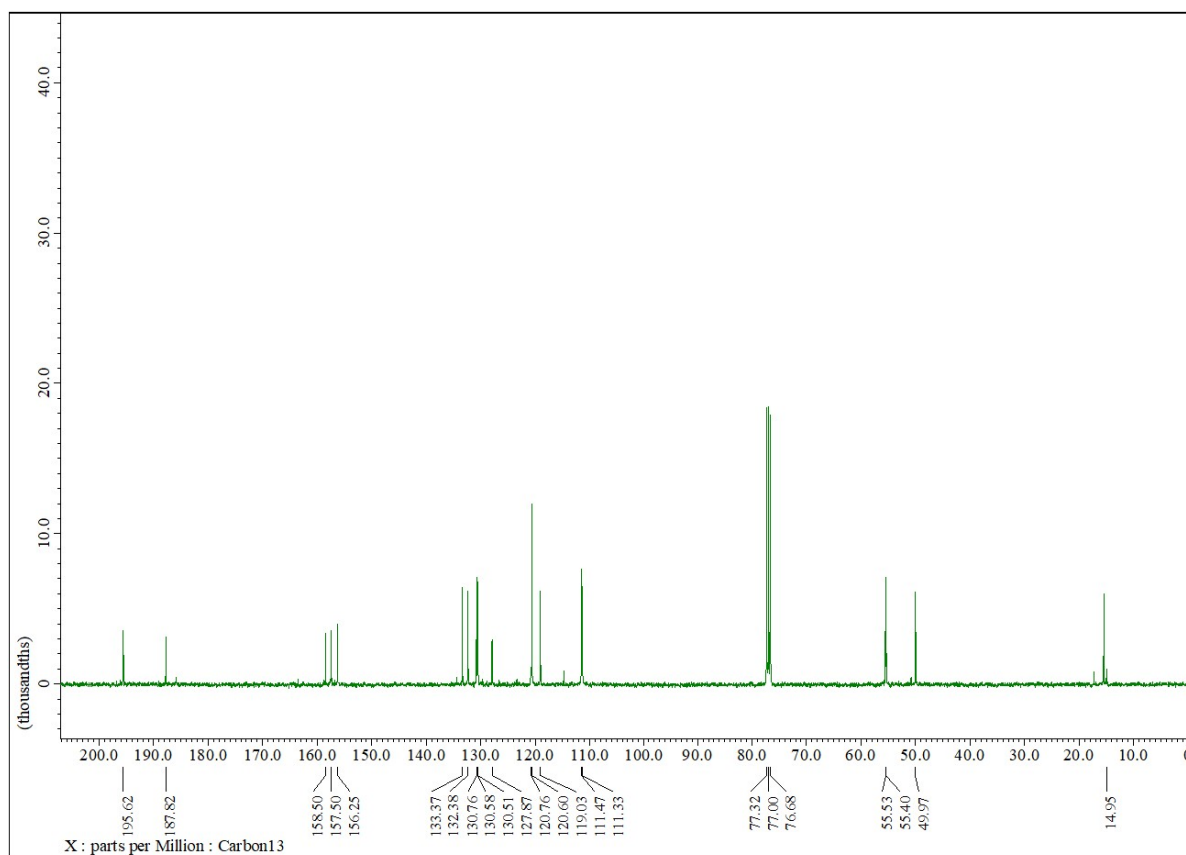

**<sup>1</sup>H NMR and <sup>13</sup>C NMR spectra of Z-5-(4-methoxyphenyl)-3-(methylthio)-1-phenylpent-2-ene-1,5-dione (1n)**

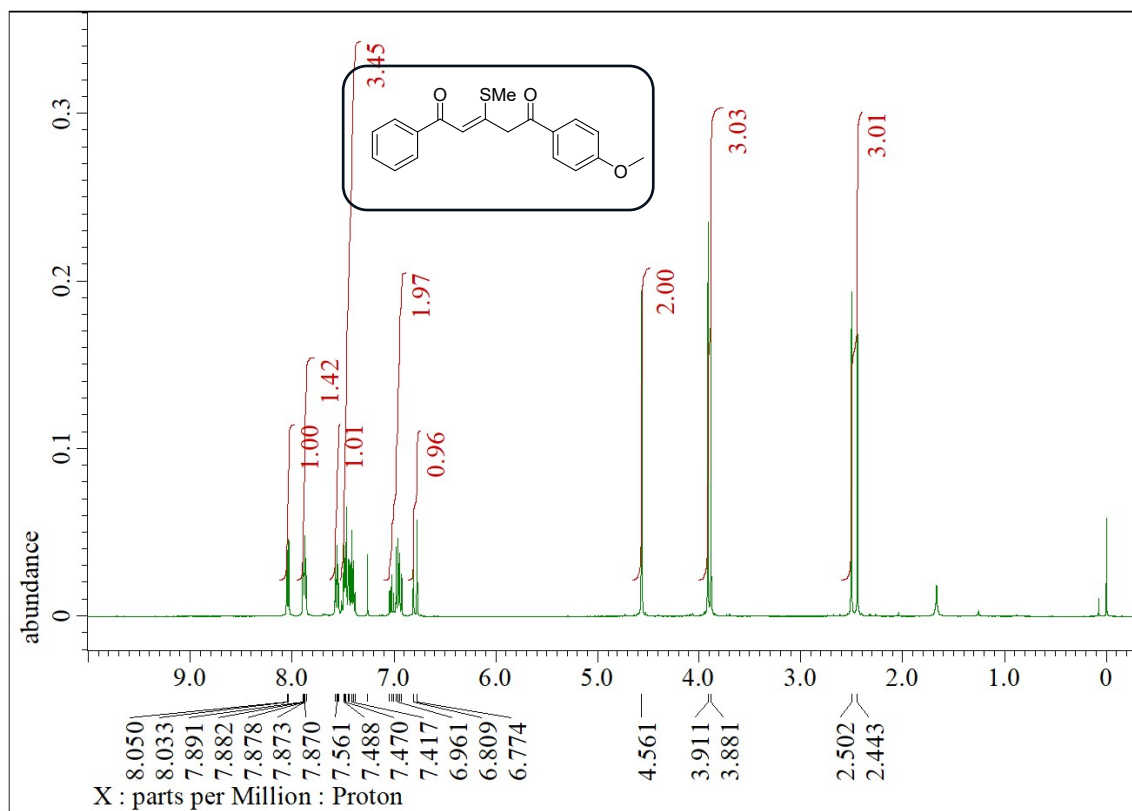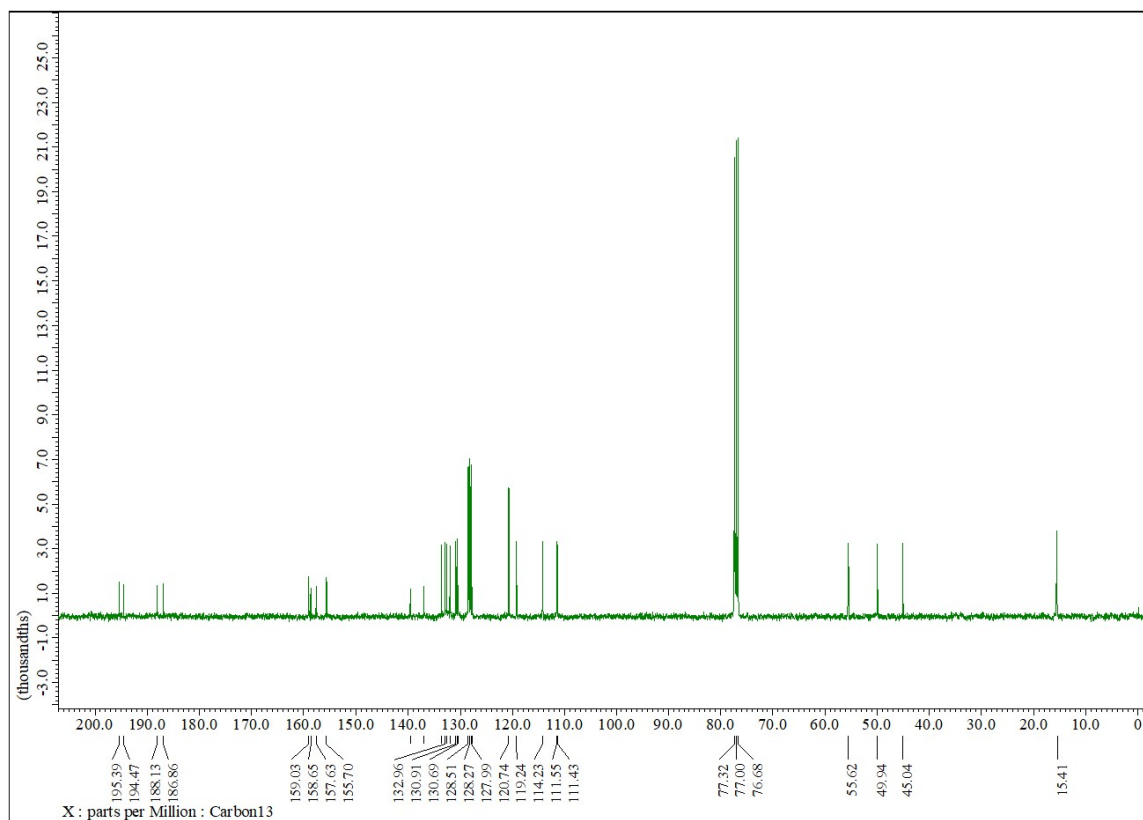

# <sup>1</sup>H NMR and <sup>13</sup>C NMR spectra of 1-(phenyl)-2-(3-(phenyl-1H-pyrazol-5-yl) ethan-1-one

(2a)

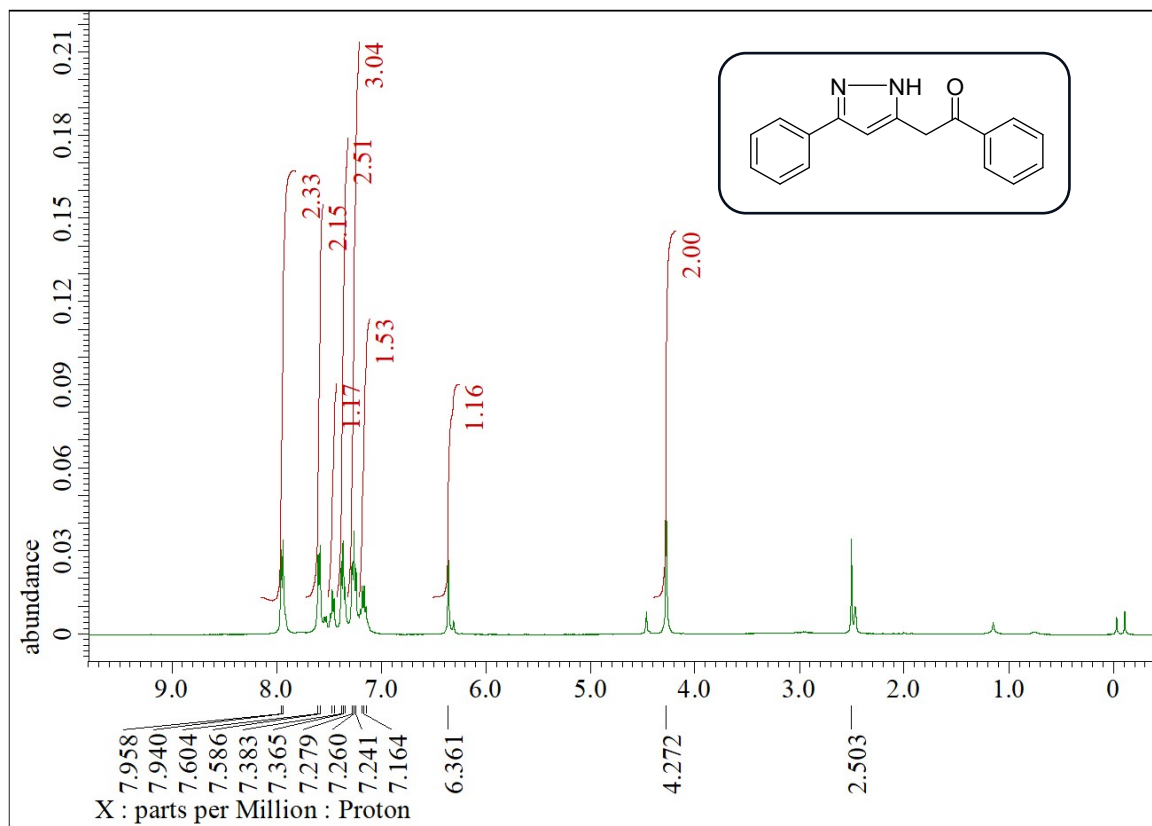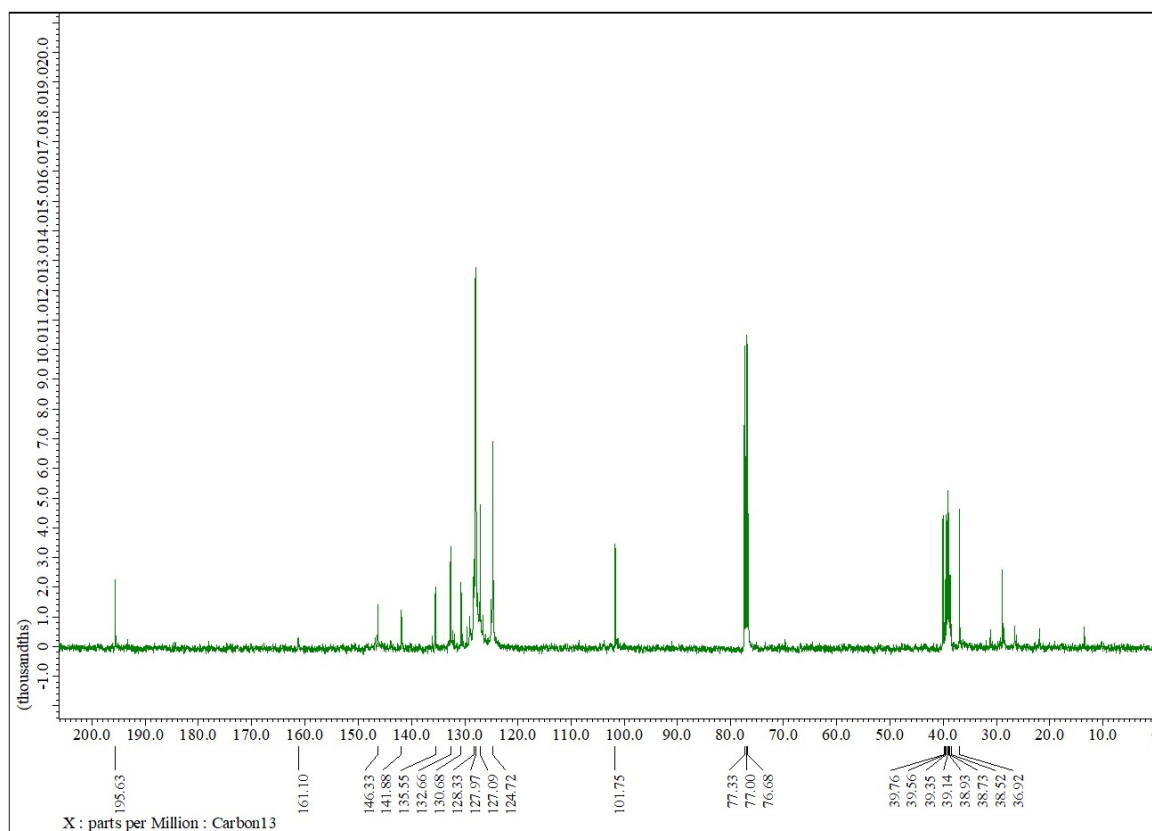

**<sup>1</sup>H NMR and <sup>13</sup>C NMR spectra of 1-(4-bromophenyl)-2-(3-4-bromophenyl)-1*H*-pyrazol-5-yl ethan-1-one (2b)**

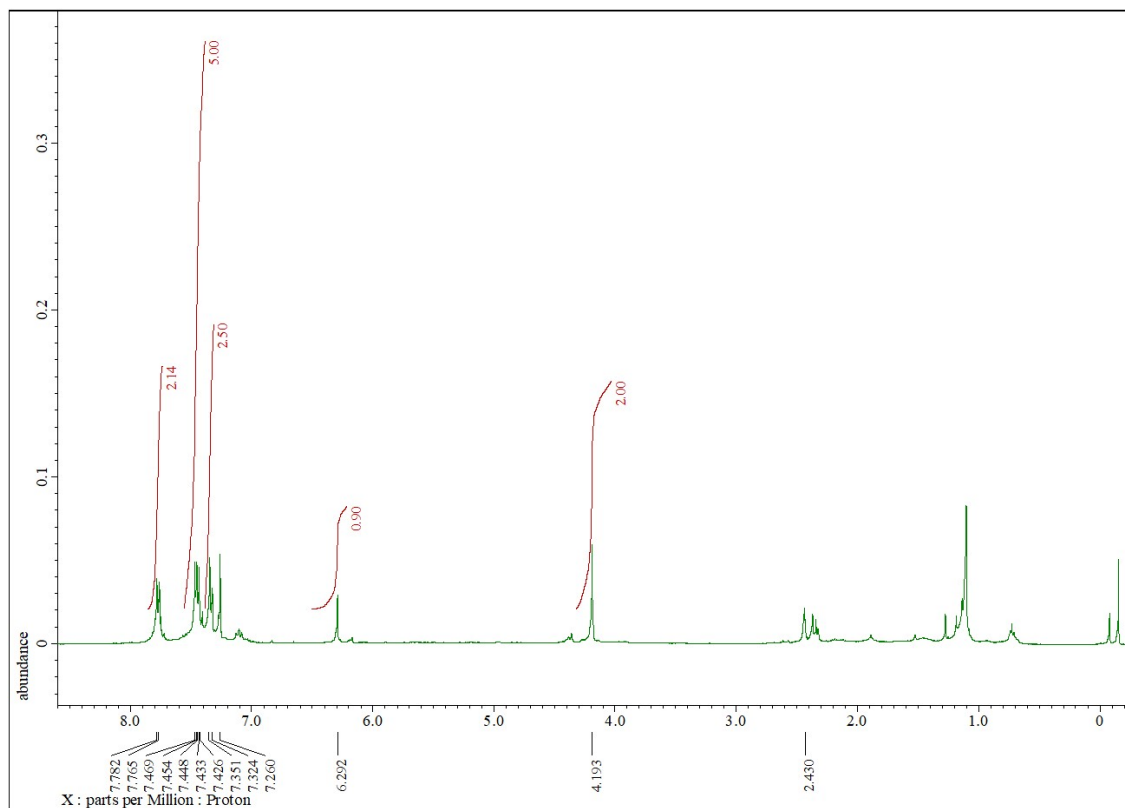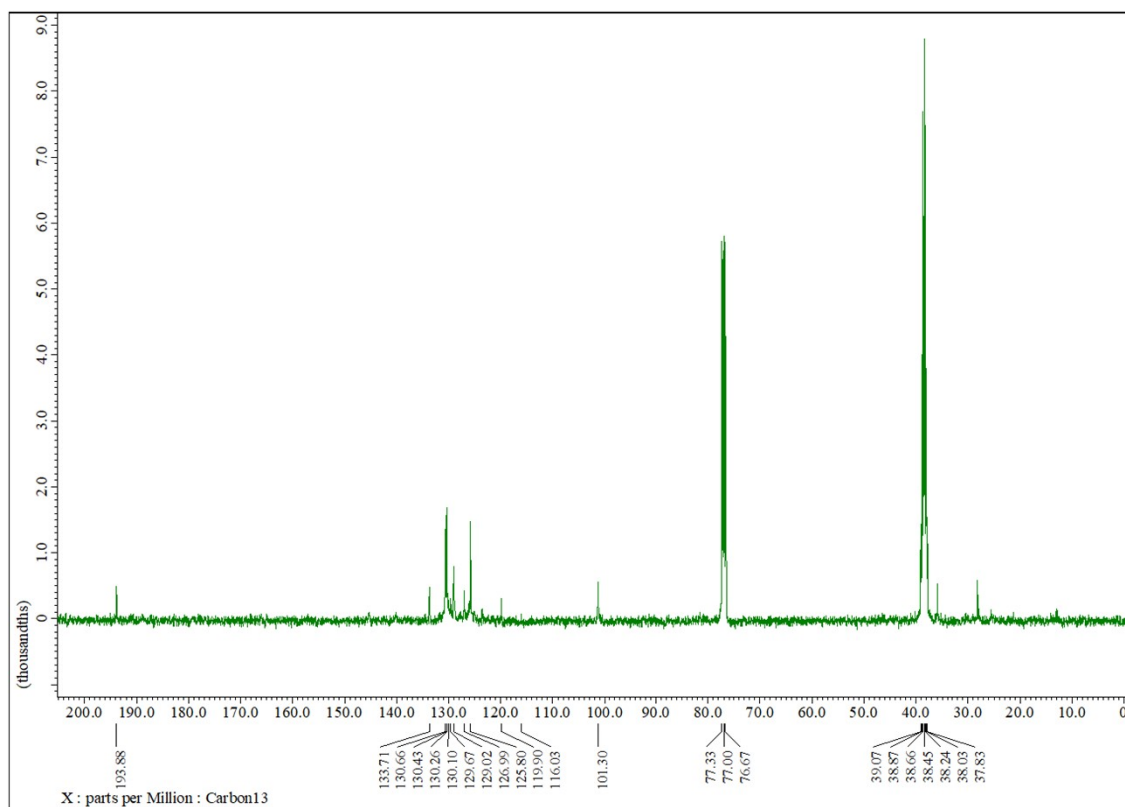



<sup>1</sup>H NMR and <sup>13</sup>C NMR spectra of 1-(*p*-tolyl)-2-(3-(*p*-tolyl)-1*H*-pyrazol-5-yl) ethan-1-one  
(2c)

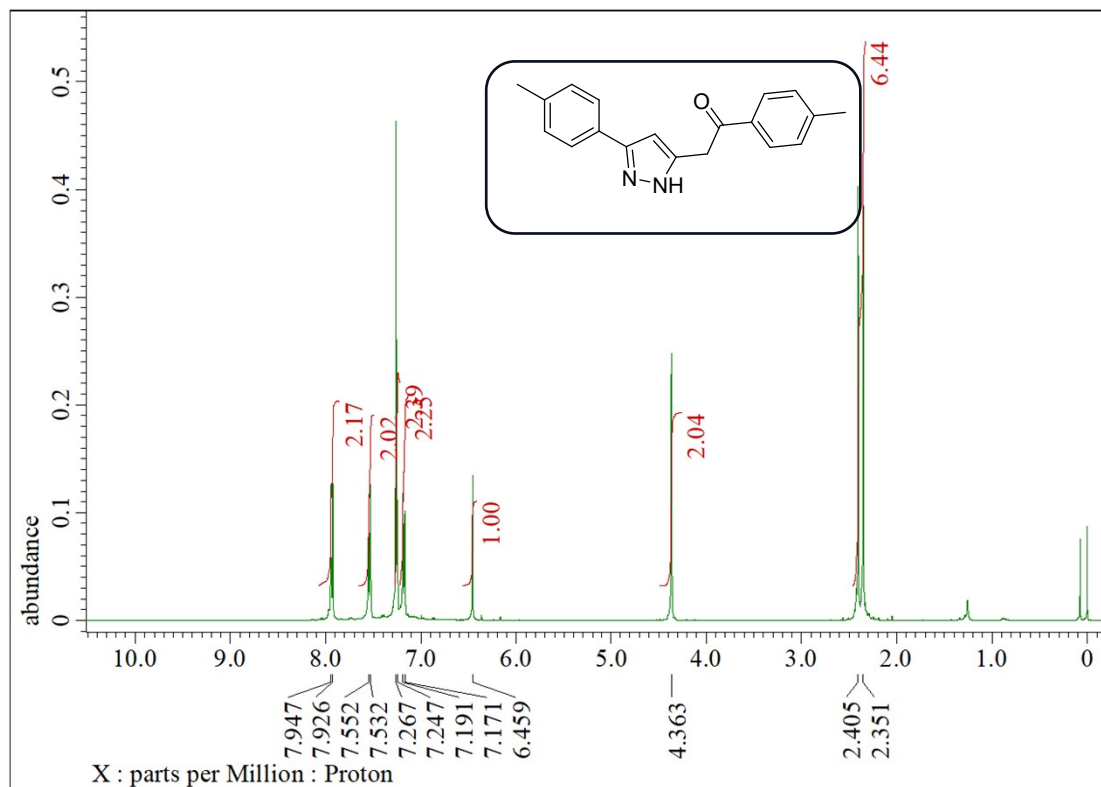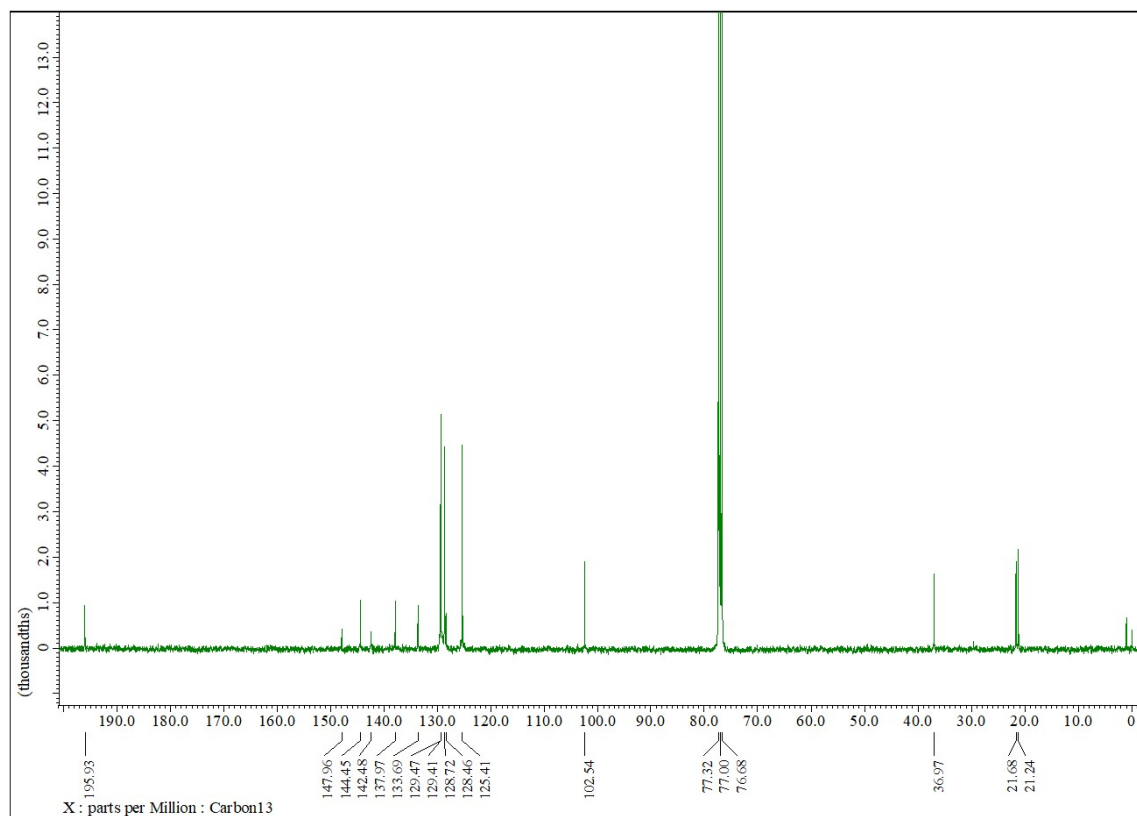

**<sup>1</sup>H NMR and <sup>13</sup>C NMR spectra of 1-(4-fluorophenyl)-2-(3-(4-fluorophenyl)-1H-pyrazol-5-yl) ethan-1-one (2d)**

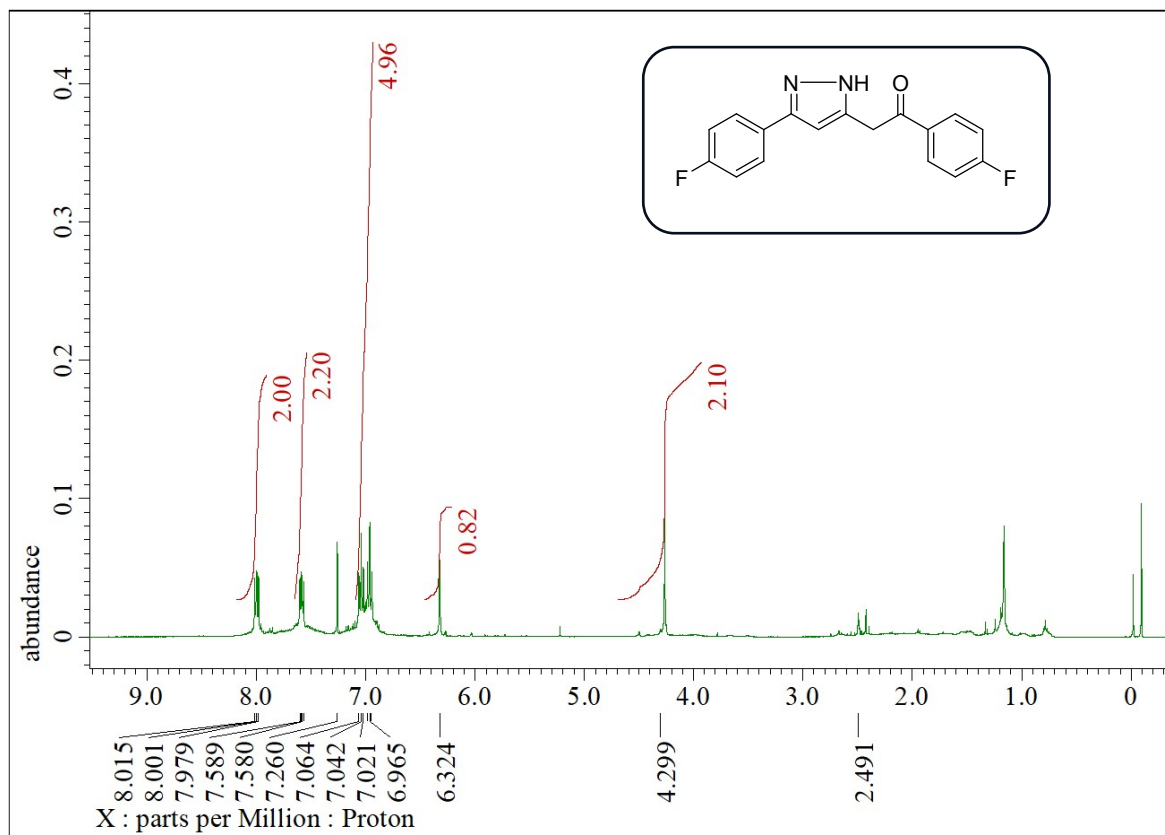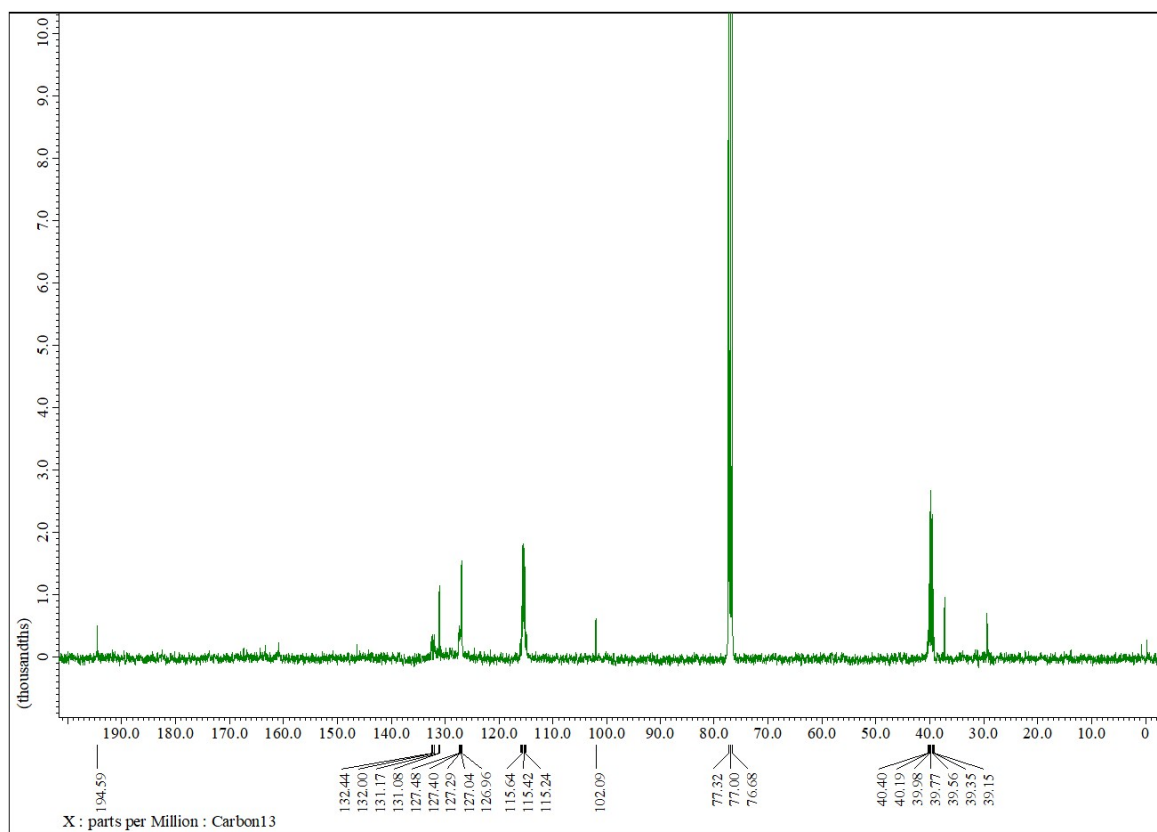

**<sup>1</sup>H NMR and <sup>13</sup>C NMR spectra of 1-(4-methoxyphenyl)-2-(3-(4-methoxyphenyl)-1H-pyrazol-5-yl) ethan-1-one (2e)**

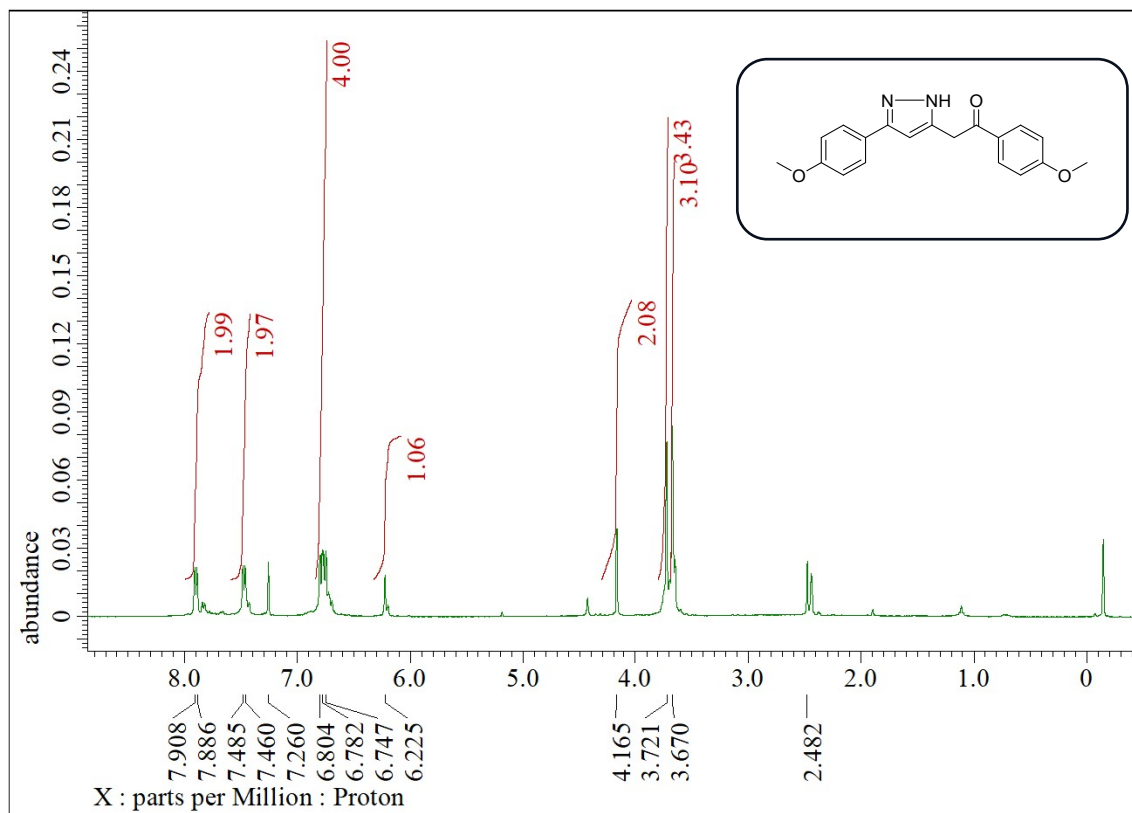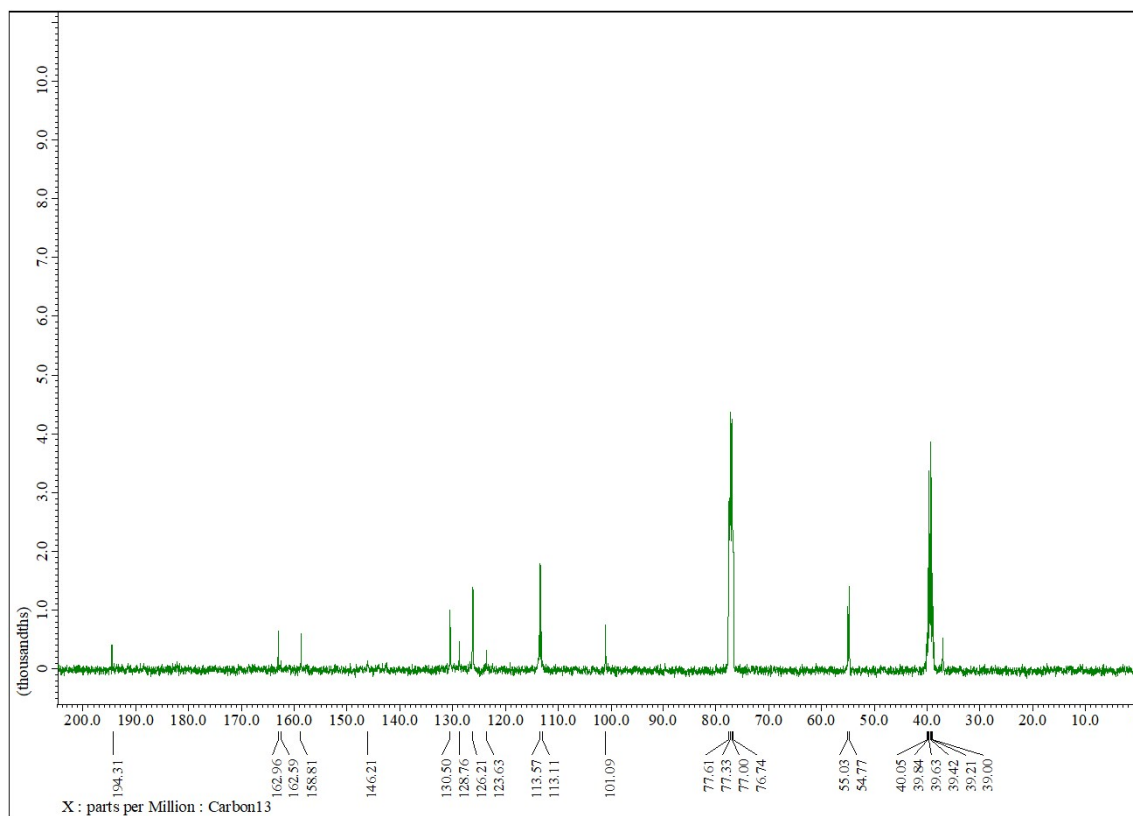

**<sup>1</sup>H NMR and <sup>13</sup>C NMR spectra of 1-(4-chlorophenyl)-2-(3-(4-chlorophenyl)-1H-pyrazol-5-yl) ethan-1-one (2f)**

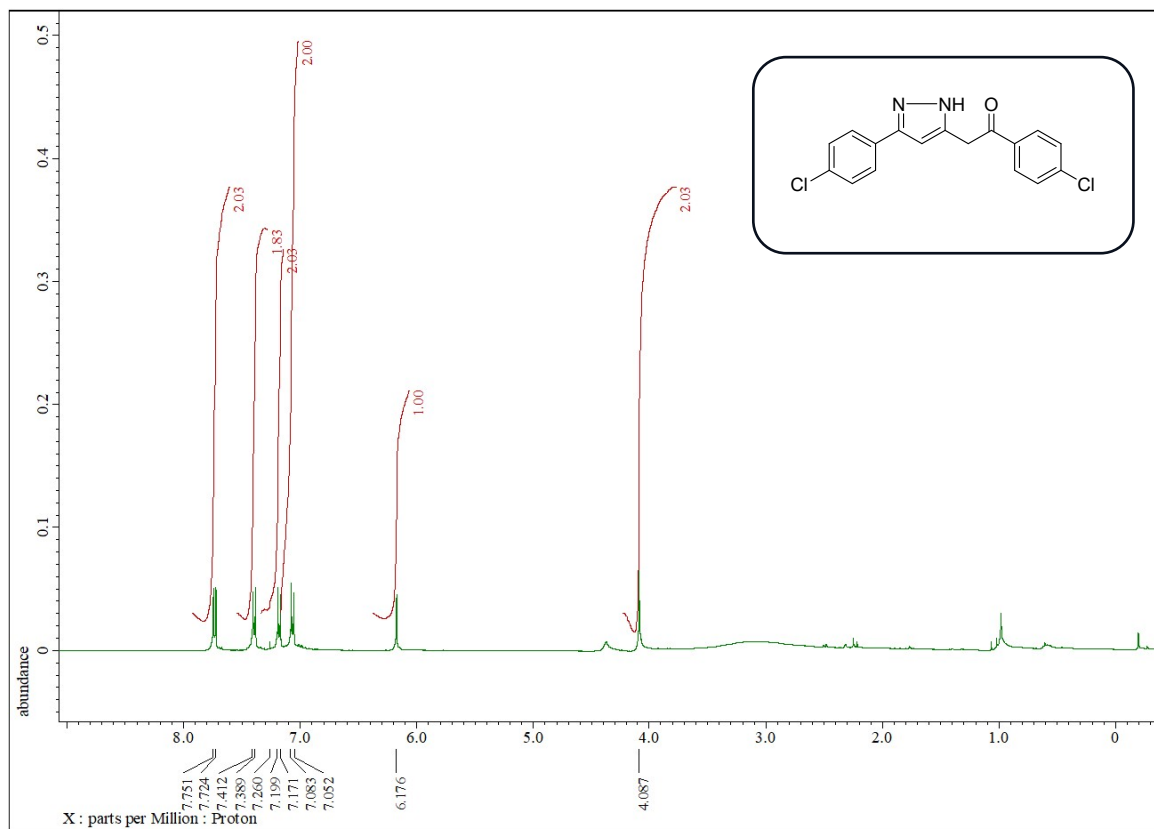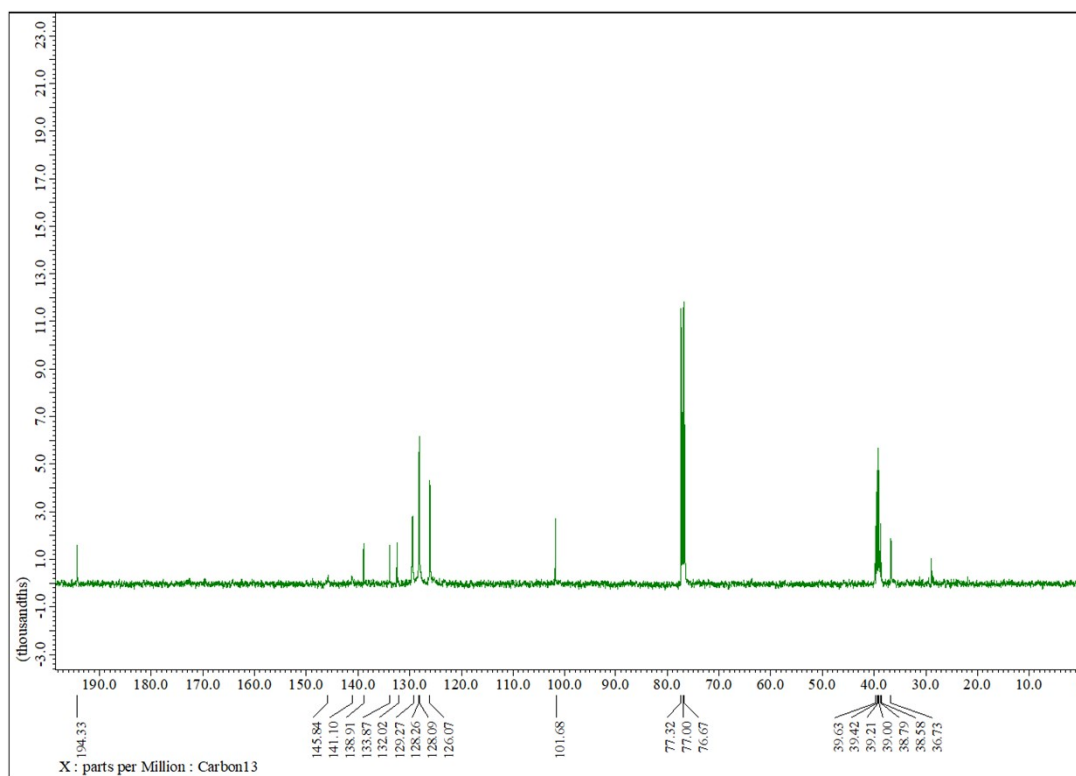

**<sup>1</sup>H NMR and <sup>13</sup>C NMR spectra of 1-(3-bromophenyl)-2-(3-3-bromophenyl)-1*H*-pyrazol-5-yl) ethan-1-one (2g)**

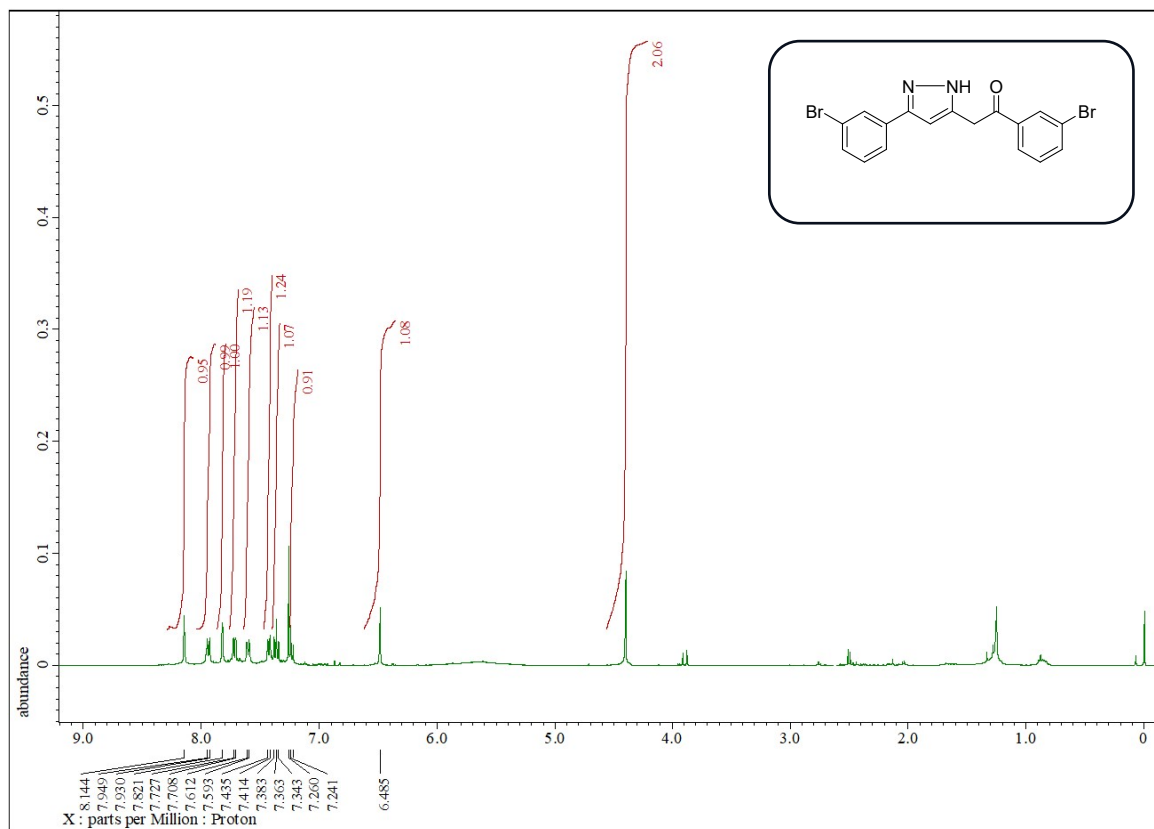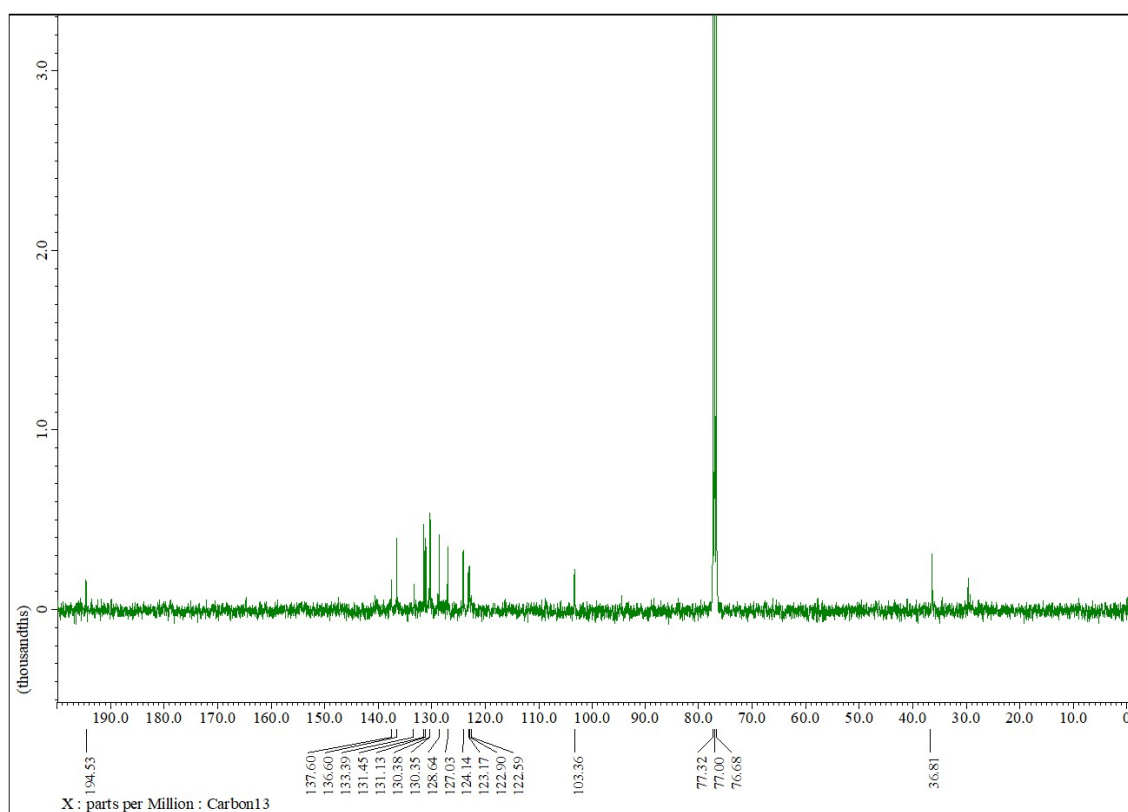

**<sup>1</sup>H NMR and <sup>13</sup>C NMR spectra of 1-(2-methoxyphenyl)-2-(3-(2-methoxyphenyl)-1H-pyrazol-5-yl) ethan-1-one (2h)**

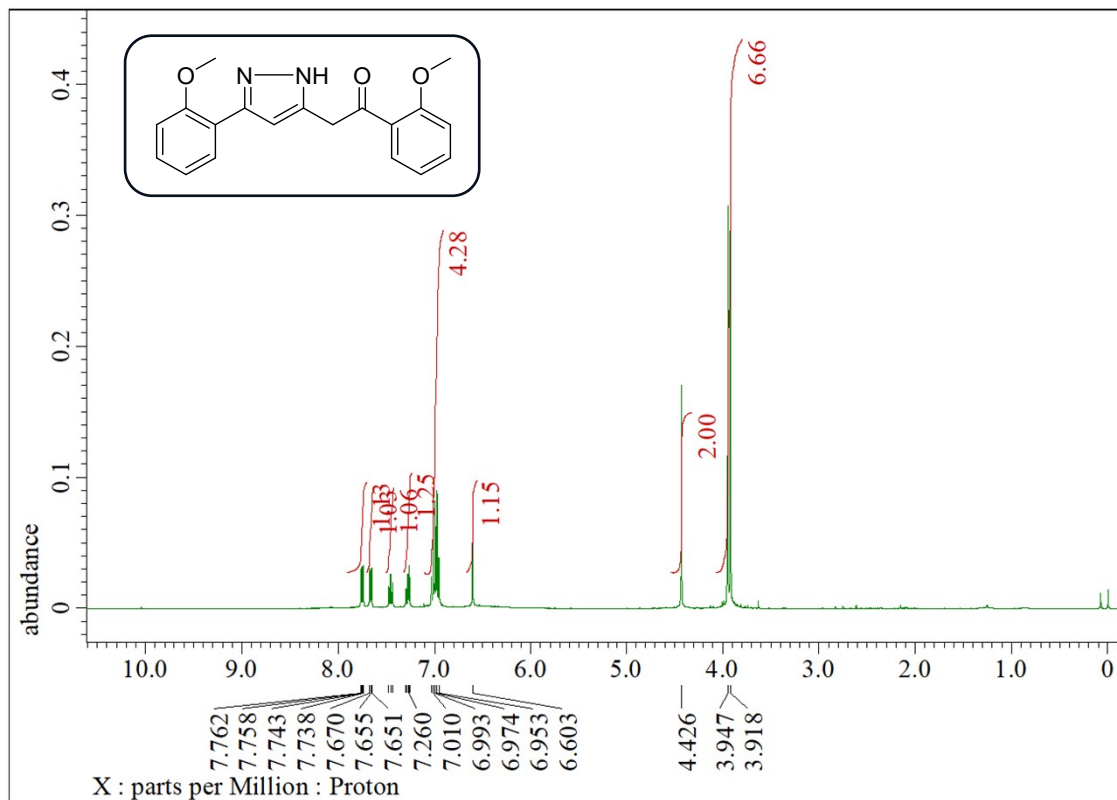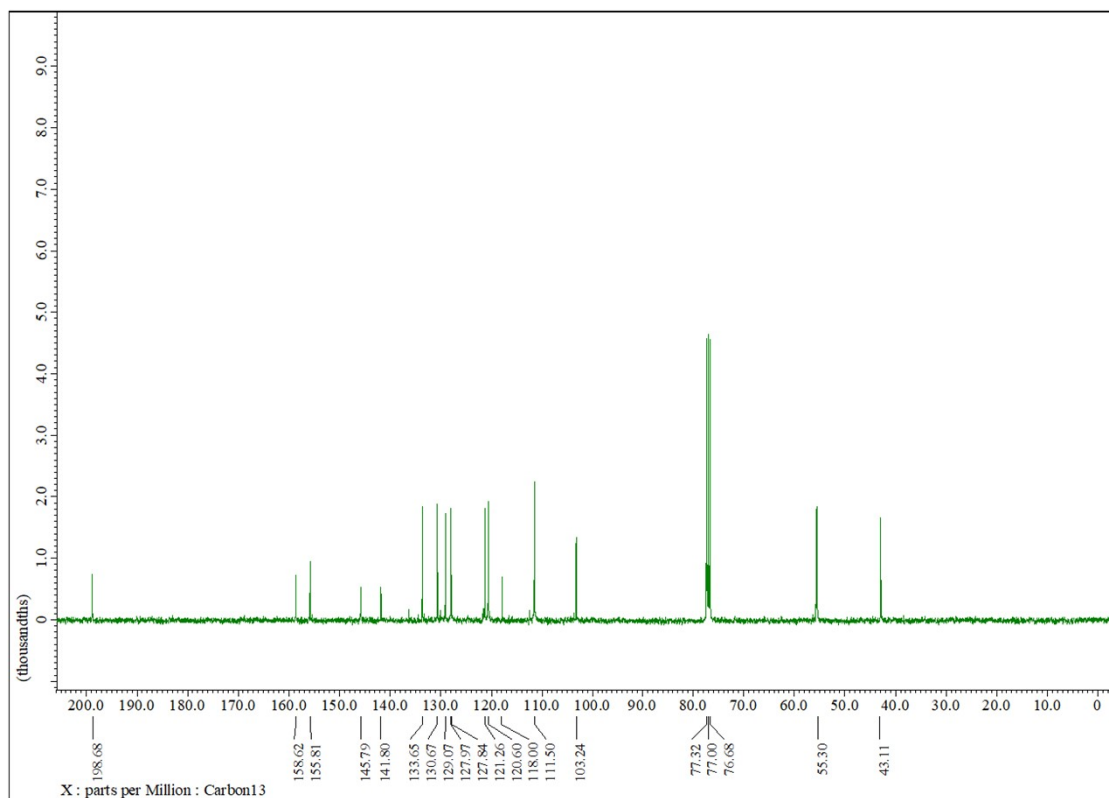

**<sup>1</sup>H NMR and <sup>13</sup>C NMR spectra of 1-phenyl-2-(3-phenyl-1*H*-pyrazol-5-yl)ethane-1,2-dione (3a)**

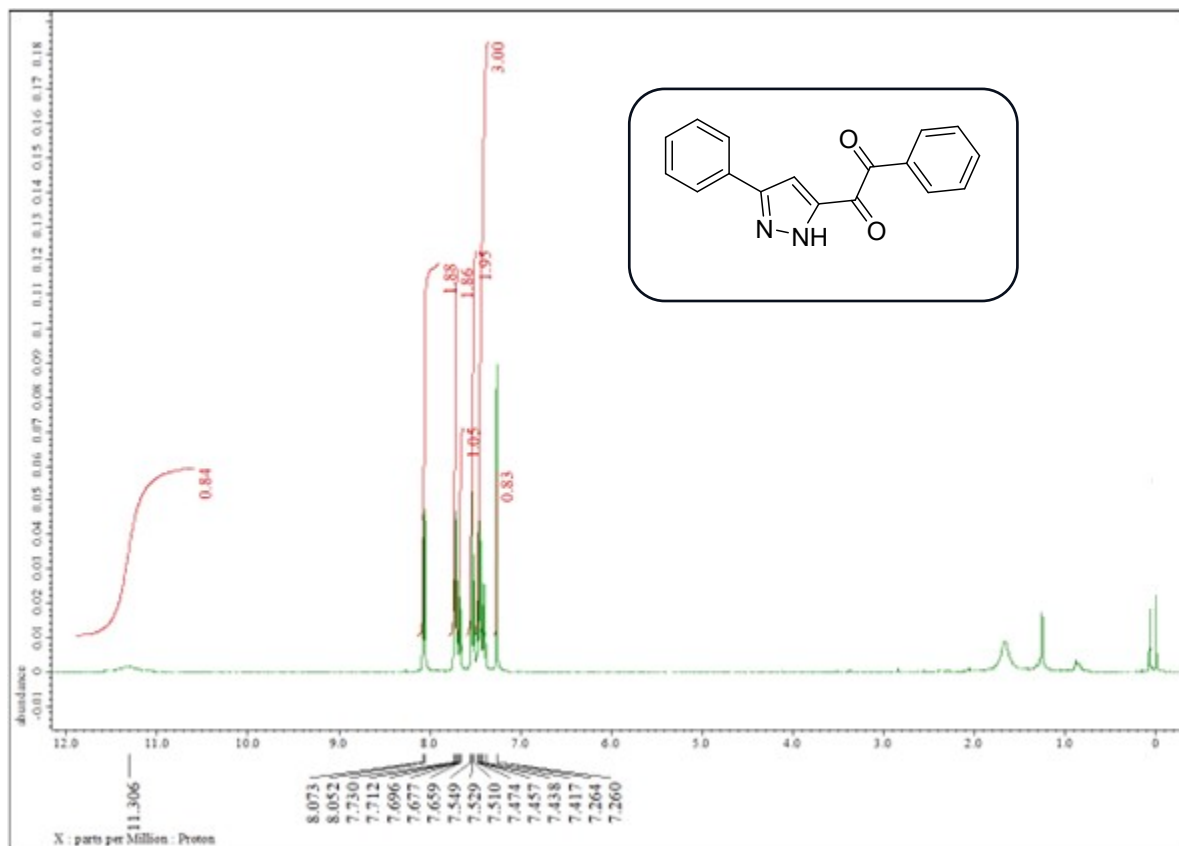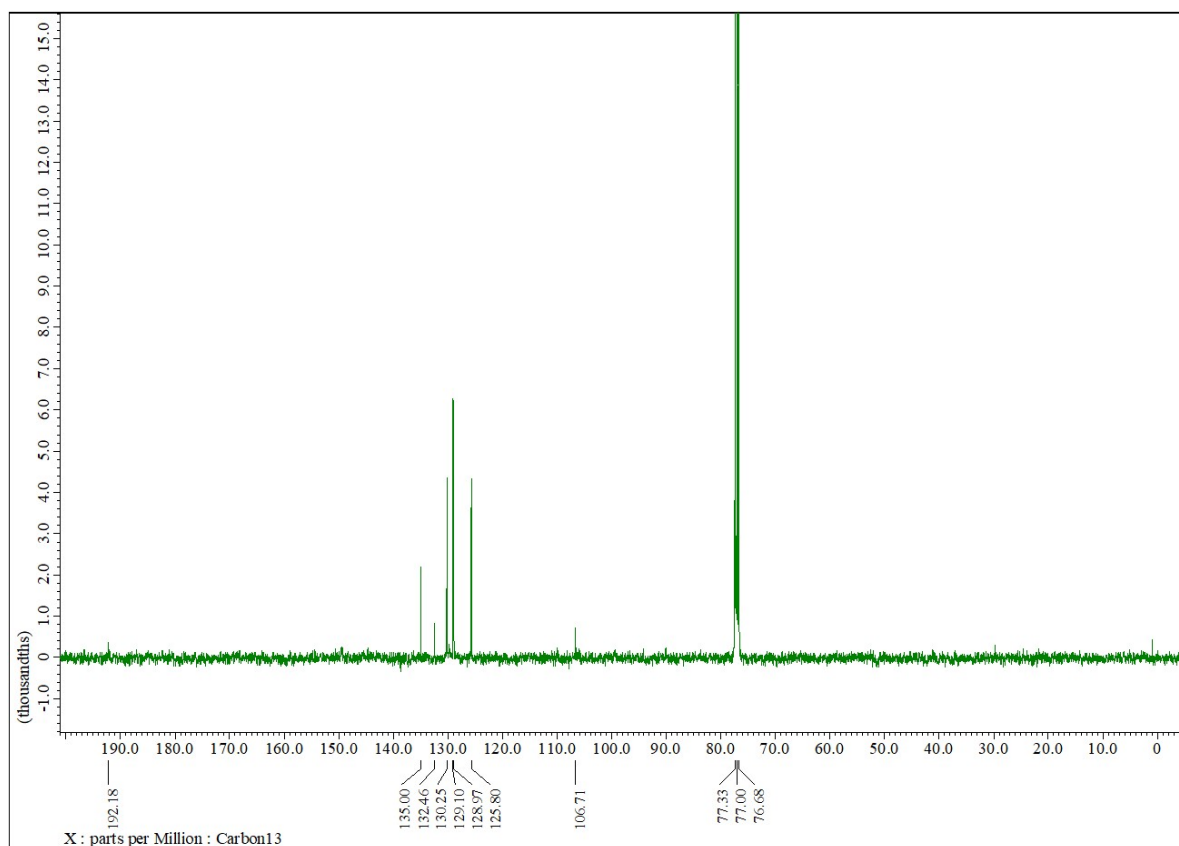

**<sup>1</sup>H NMR and <sup>13</sup>C NMR spectra of 1-(4-bromophenyl)-2-(3-(4-bromophenyl)-1H-pyrazol-5-yl)ethane-1,2-dione (3b)**

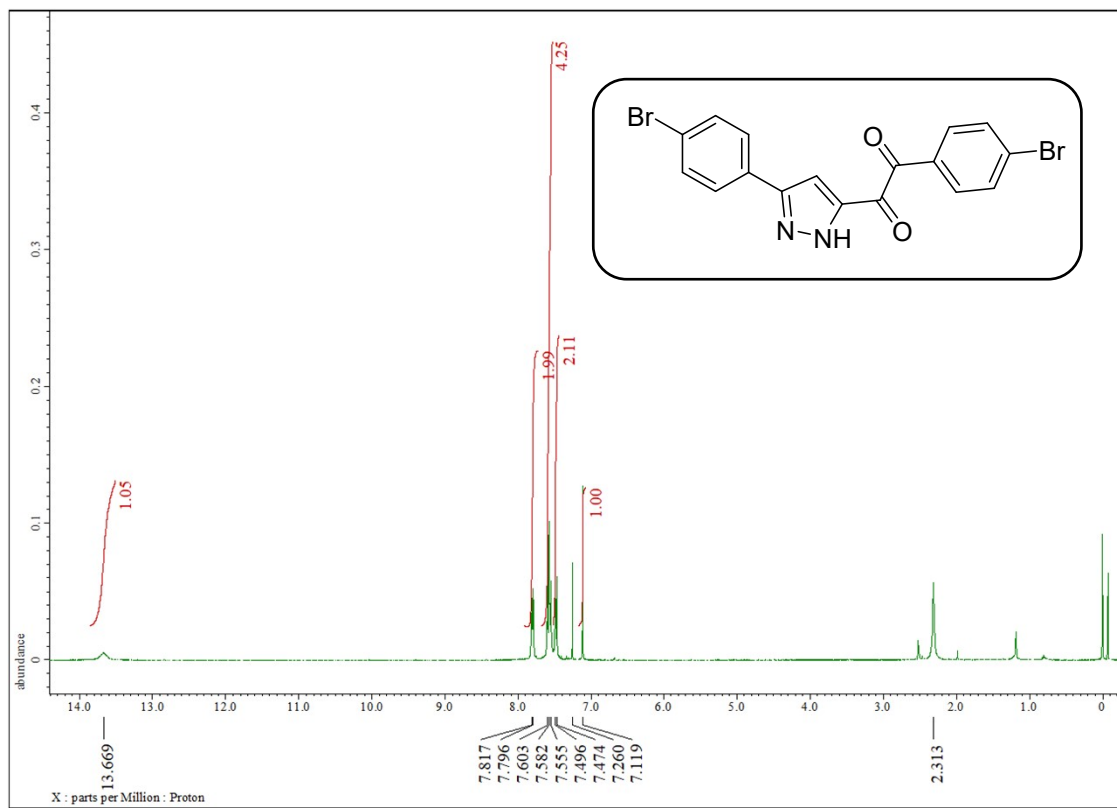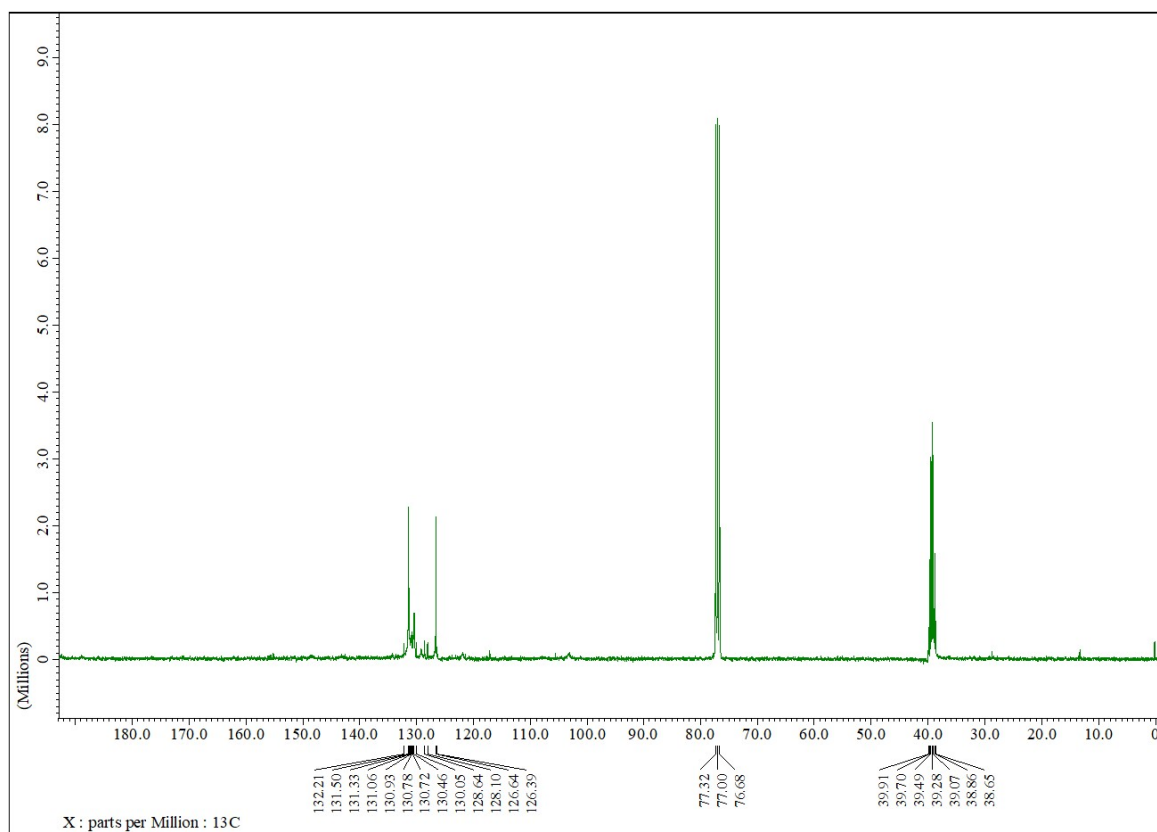



**<sup>1</sup>H NMR and <sup>13</sup>C NMR spectra of 1-(*p*-tolyl)-2-(3-(*p*-tolyl)-1*H*-pyrazol-5-yl)ethane-1,2-dione (3c)**

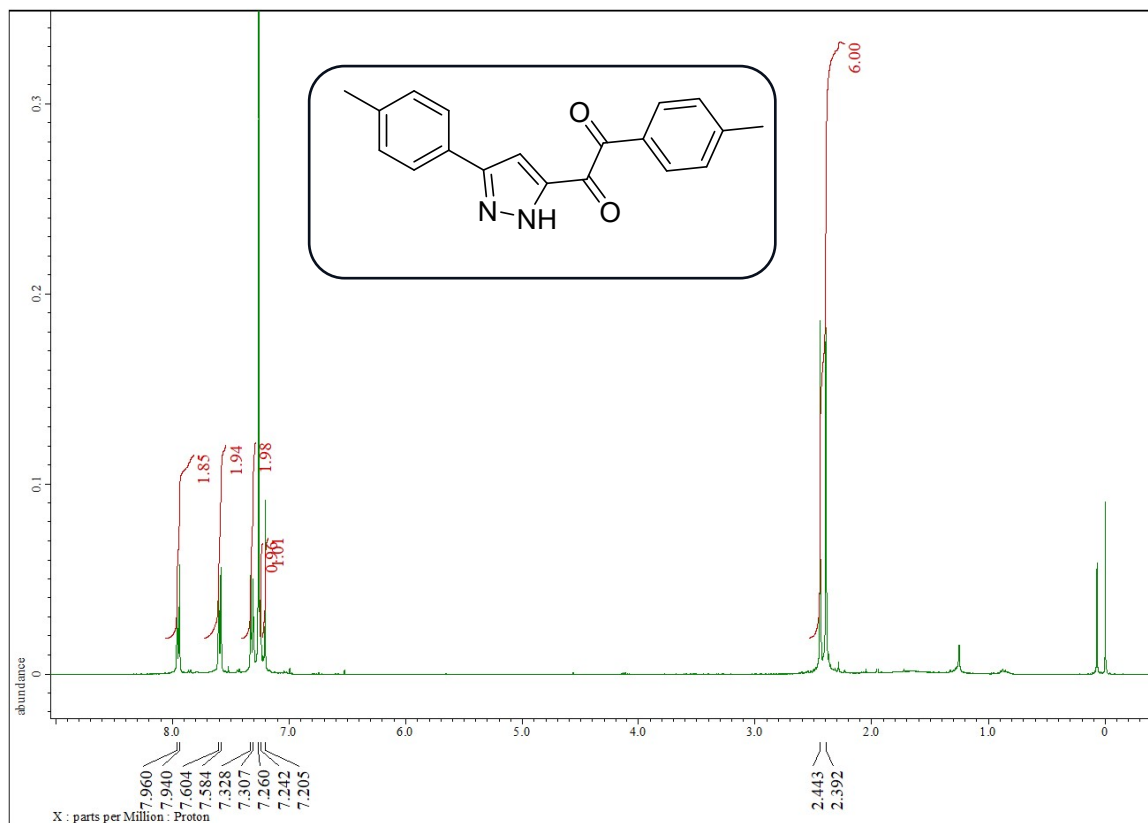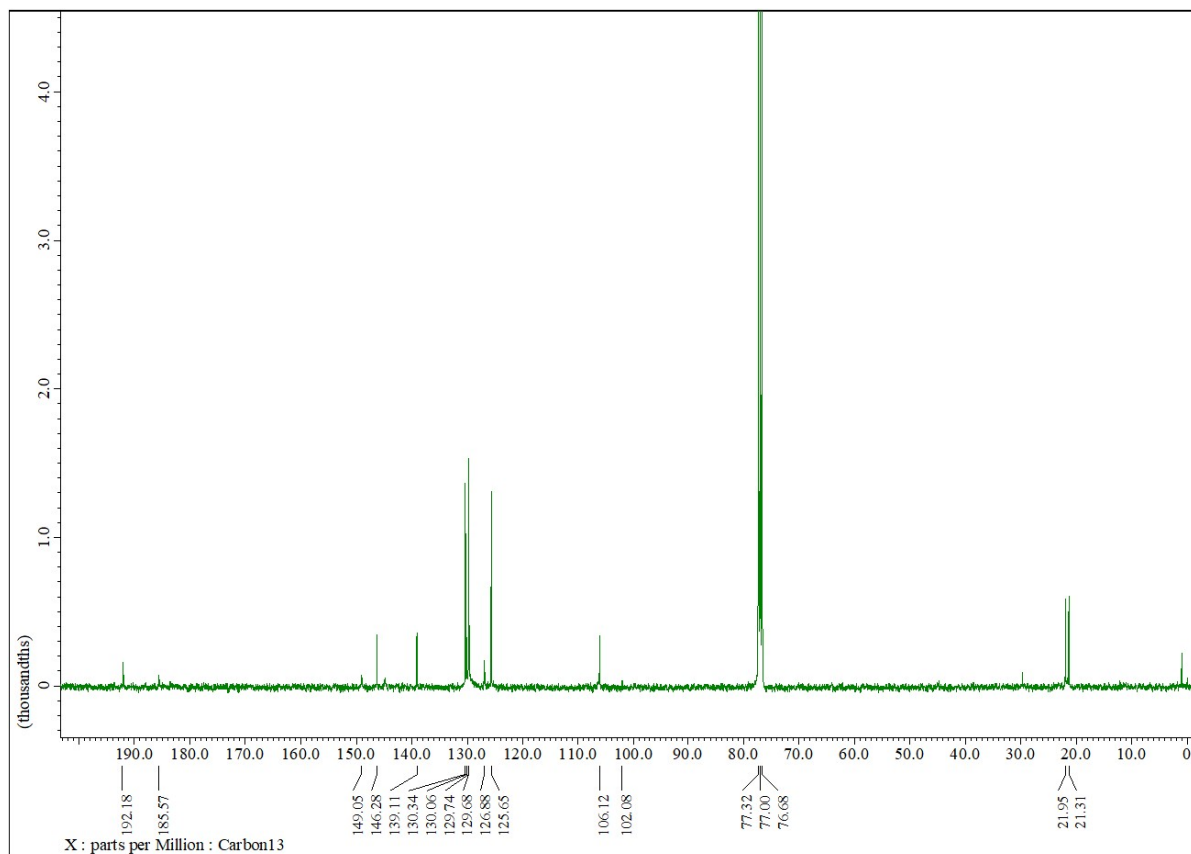

**<sup>1</sup>H NMR and <sup>13</sup>C NMR spectra of 1-(4-fluorophenyl)-2-(3-(4-fluorophenyl)-1H-pyrazol-5-yl)ethane-1,2-dione (3d)**

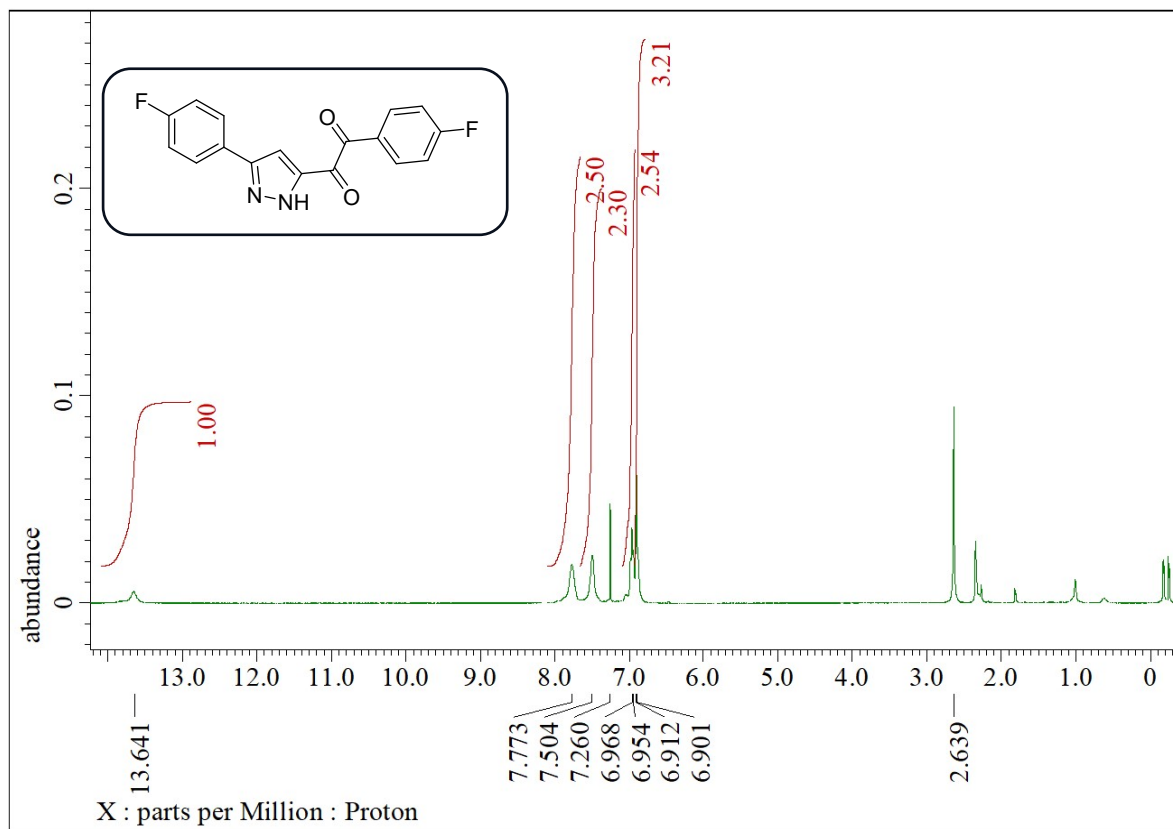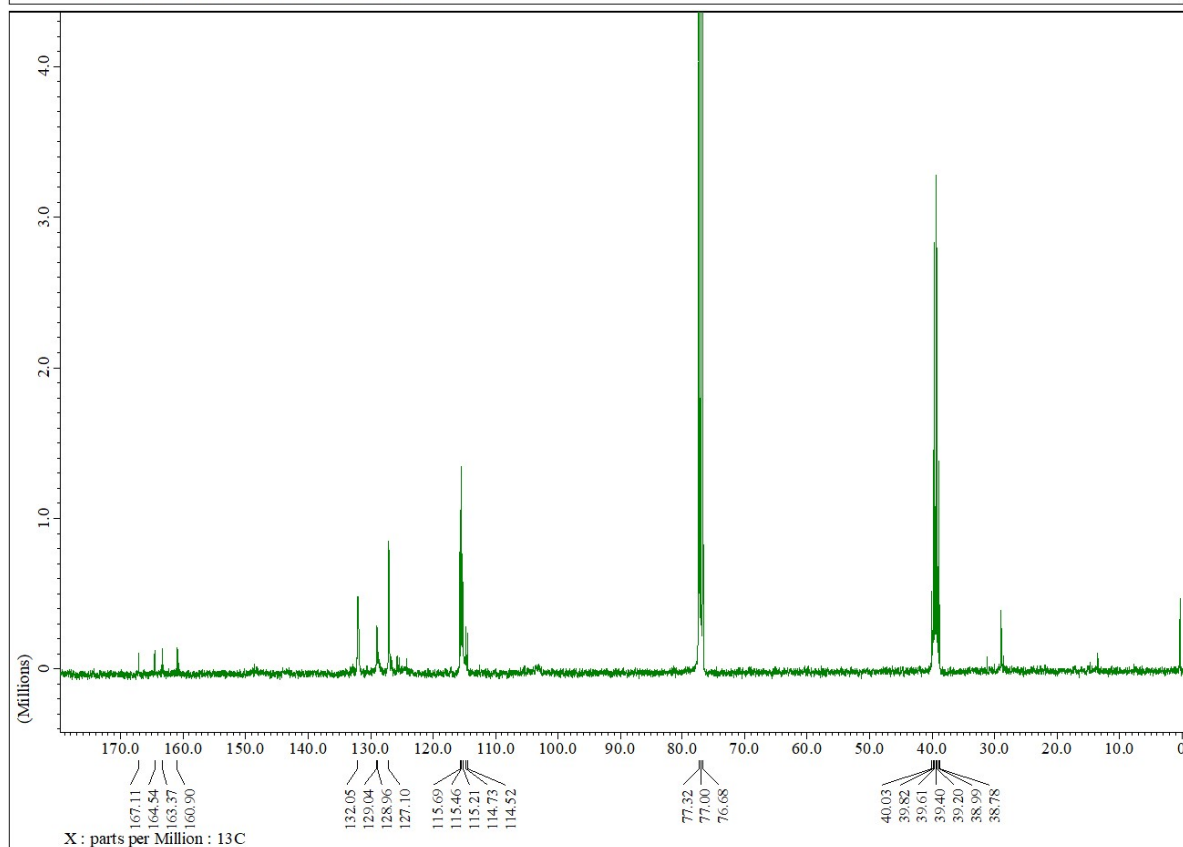

**<sup>1</sup>H NMR and <sup>13</sup>C NMR spectra of 1-(4-methoxyphenyl)-2-(3-(4-methoxyphenyl)-1H-pyrazol-5-yl) ethane-1,2-dione (3e)**

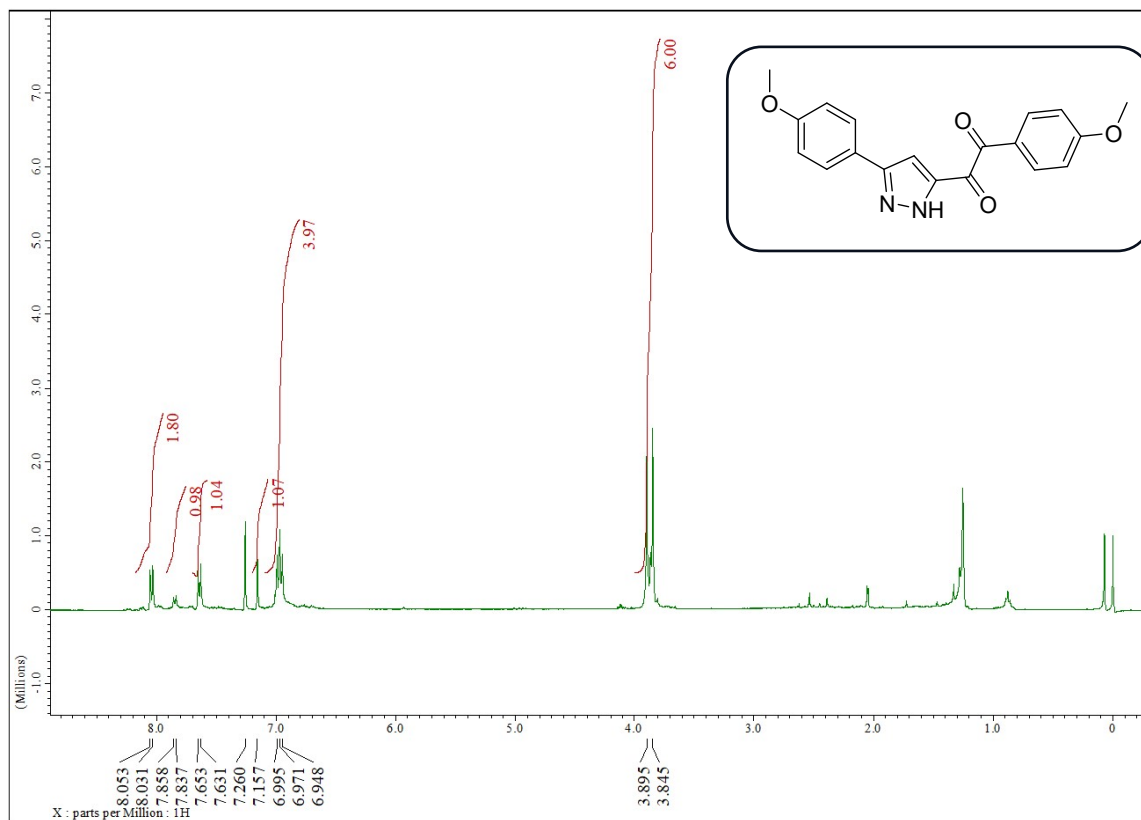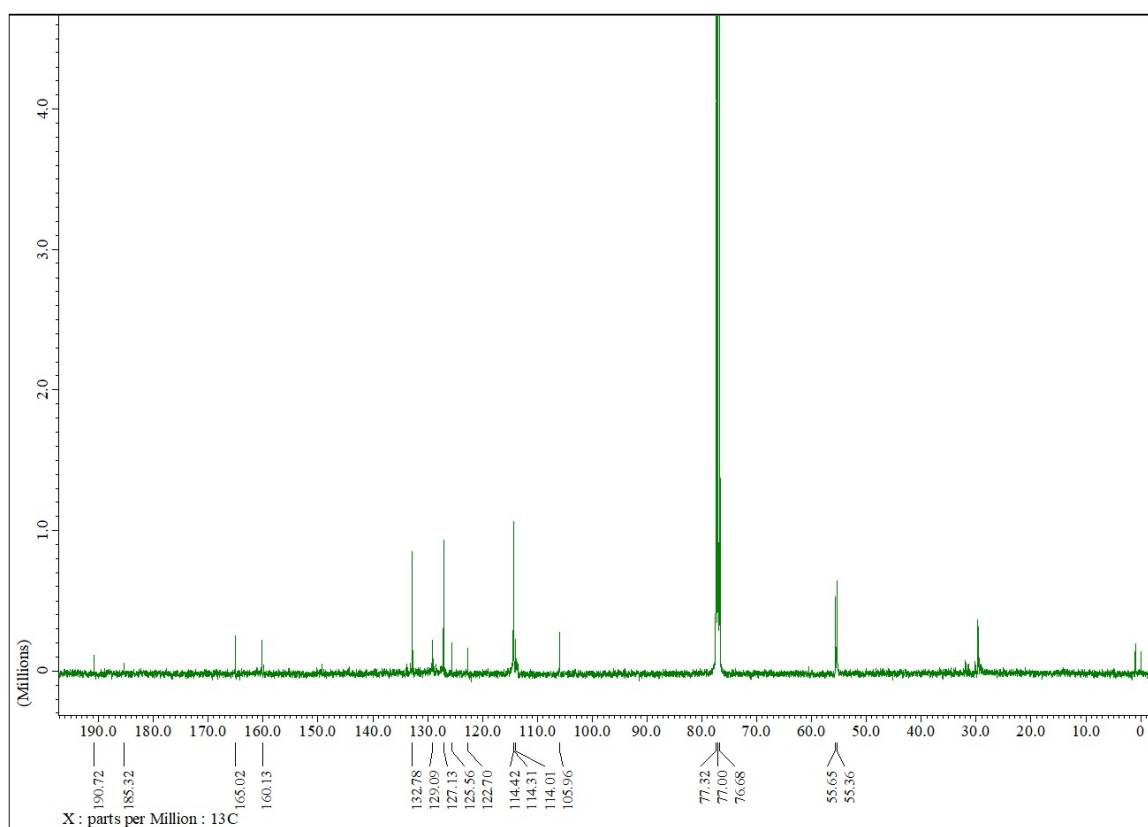

**<sup>1</sup>H NMR and <sup>13</sup>C NMR spectra of 1-(4-chlorophenyl)-2-(3-(4-chlorophenyl)-1H-pyrazol-5-yl)ethane-1,2-dione (3f)**

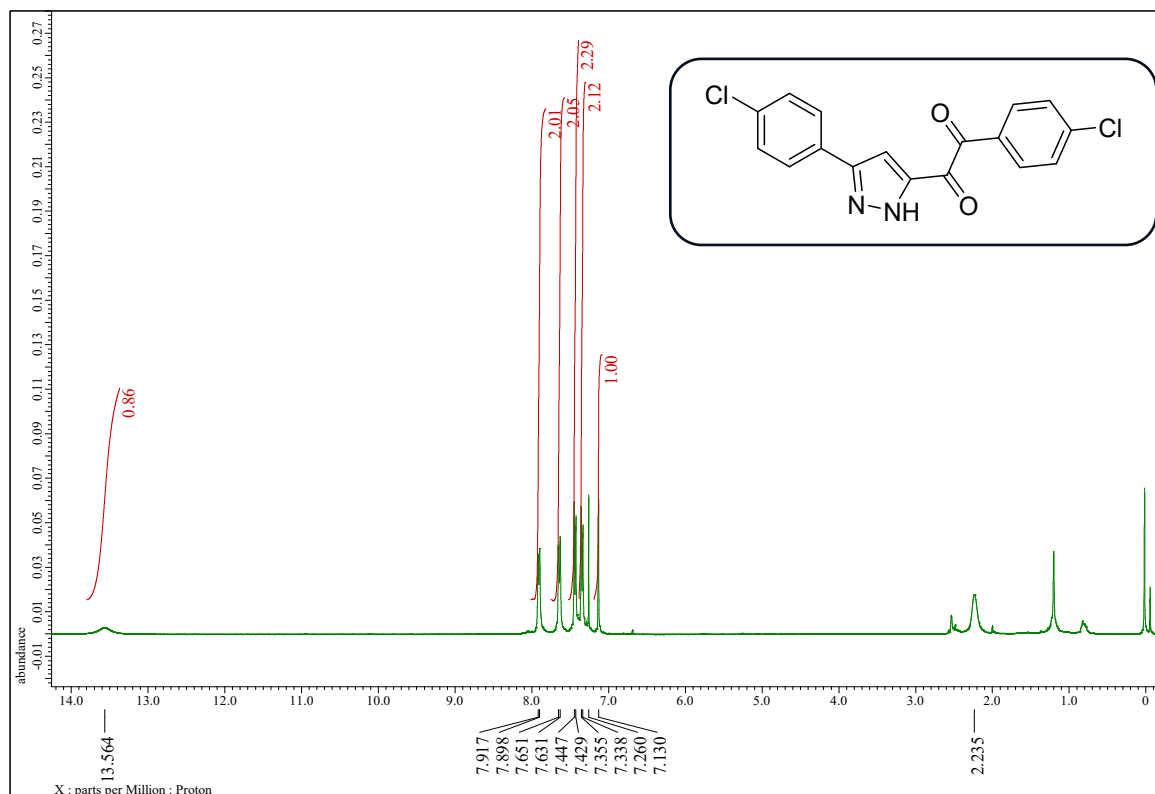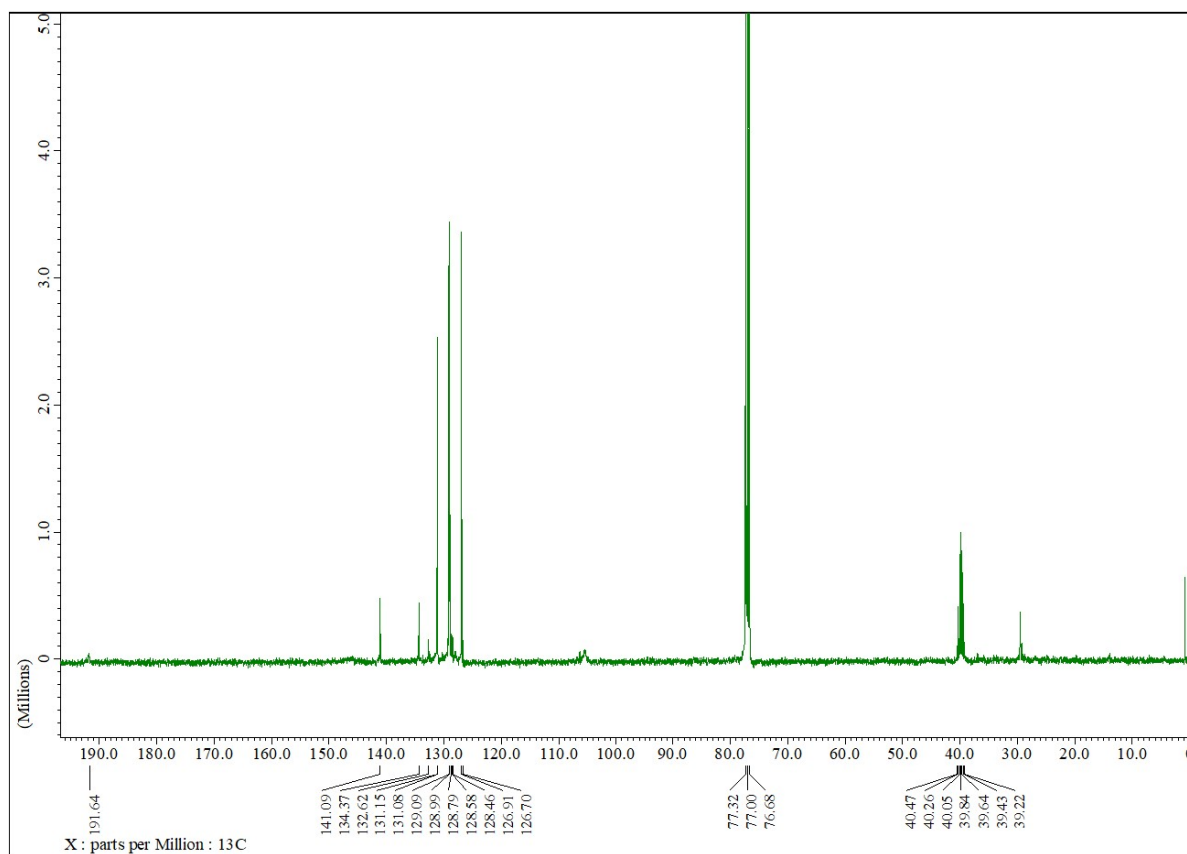

**<sup>1</sup>H NMR and <sup>13</sup>C NMR spectra of 1-(naphthalene-2-yl)-2-(3-(naphthalen-2-yl)-1H-pyrazol-5-yl)ethane-1,2-dione (3g)**

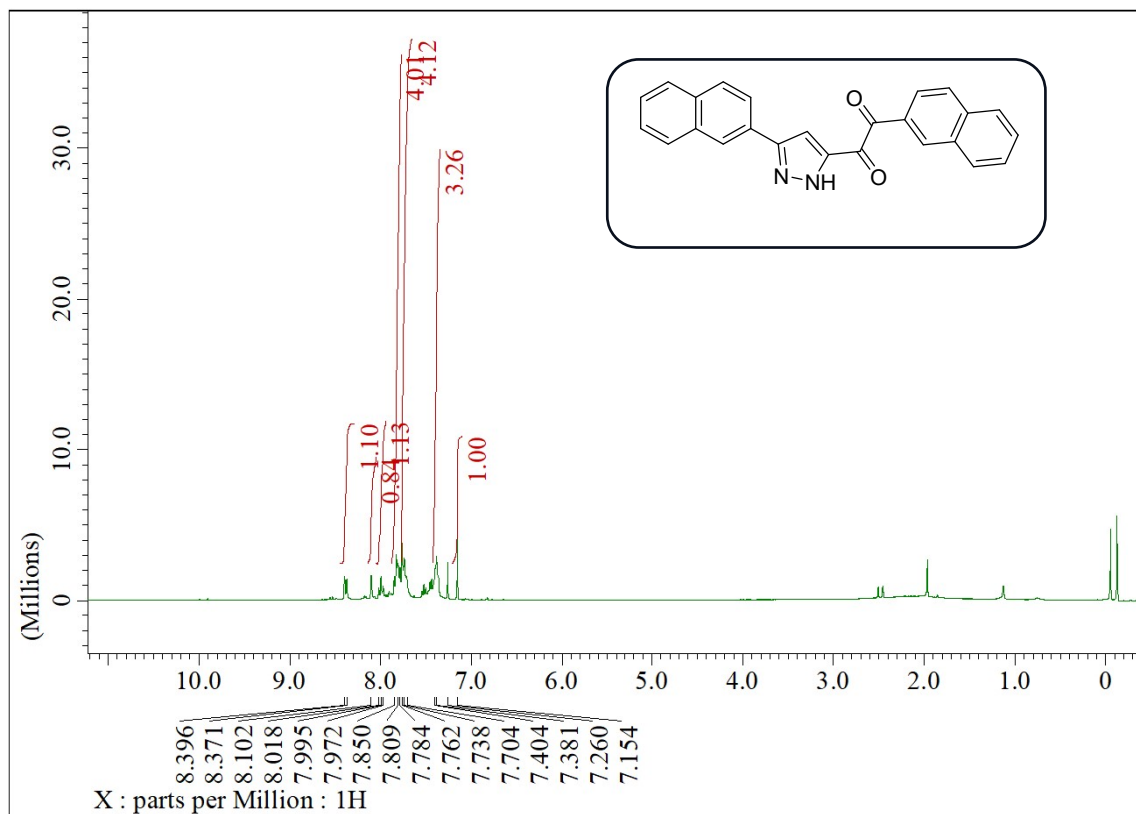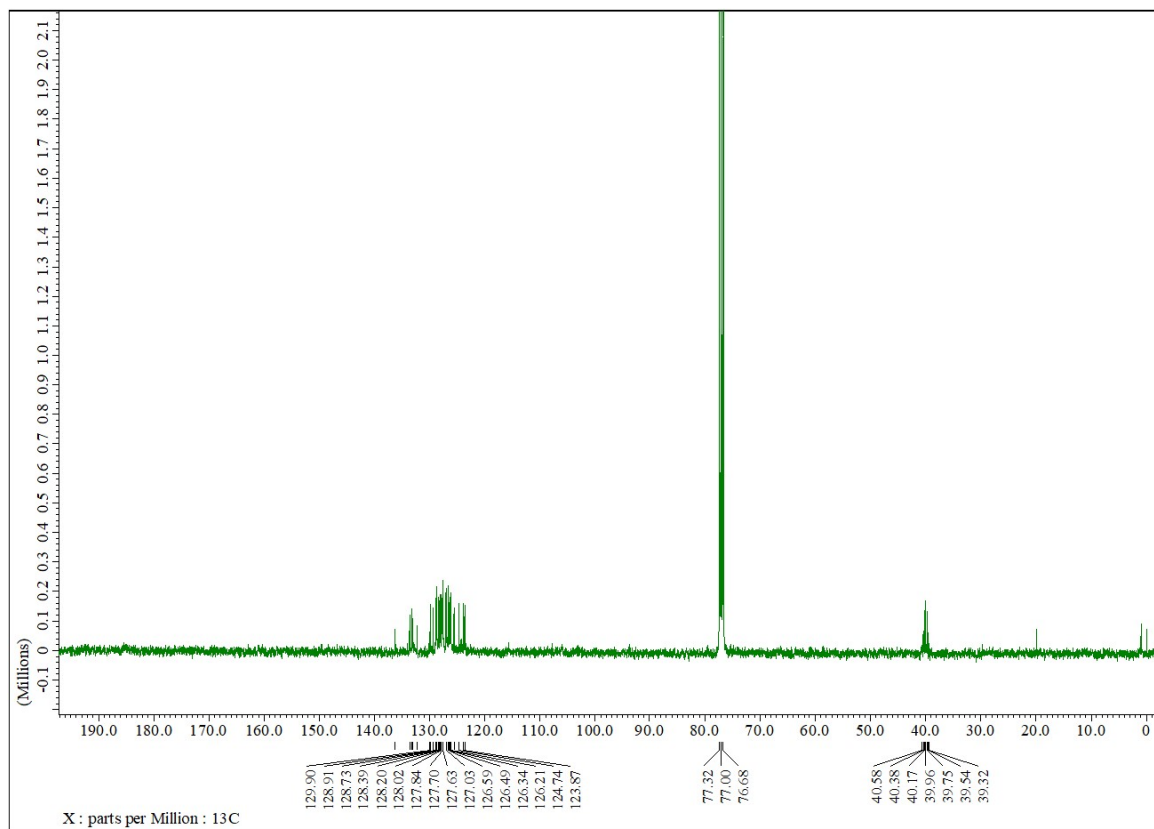

**<sup>1</sup>H NMR and <sup>13</sup>C NMR spectra of 1-(furan-2-yl)-2-(3-(furan-2-yl)-1H-pyrazol-5-yl) ethane-1,2-dione (3h)**

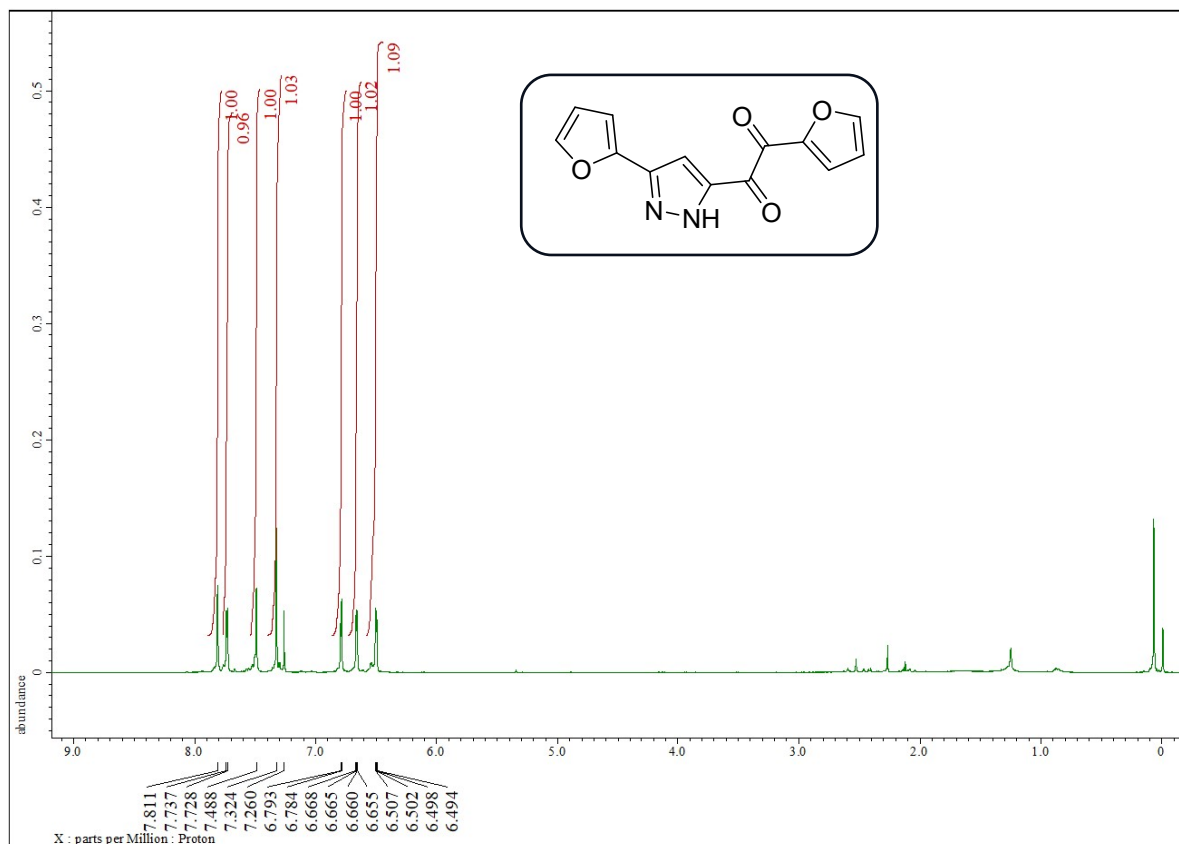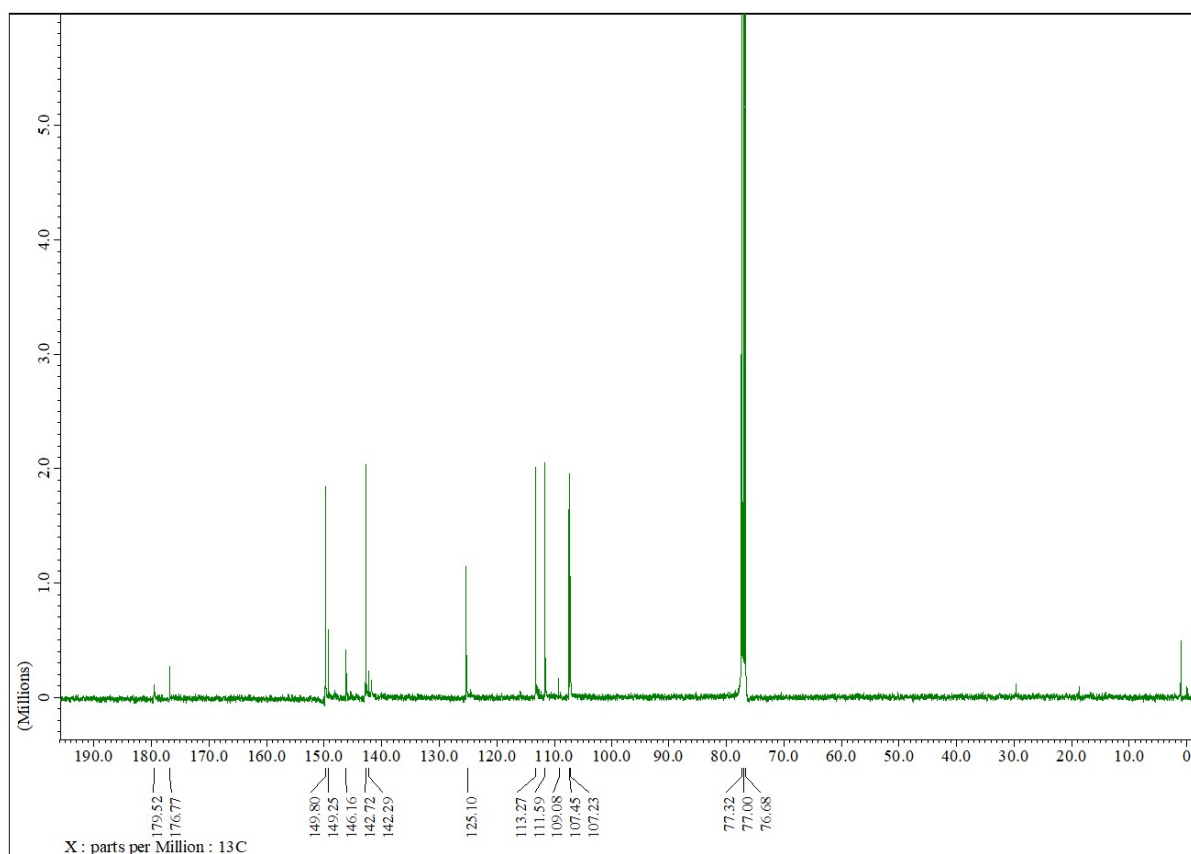

**<sup>1</sup>H NMR and <sup>13</sup>C NMR spectra of 1-([1,1-biphenyl]-4-yl)-2-(3-([1,1-biphenyl]-4-yl)-1H-pyrazol-5-yl)ethane-1,2-dione (3i)**

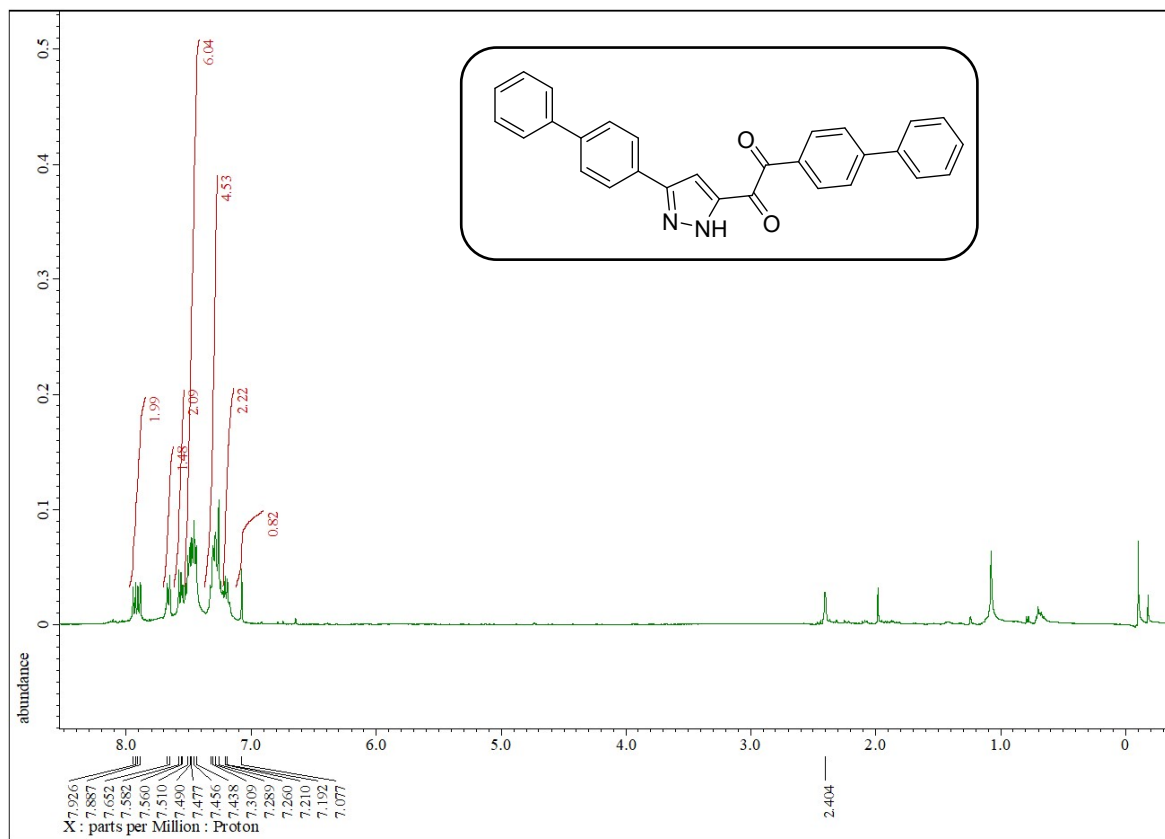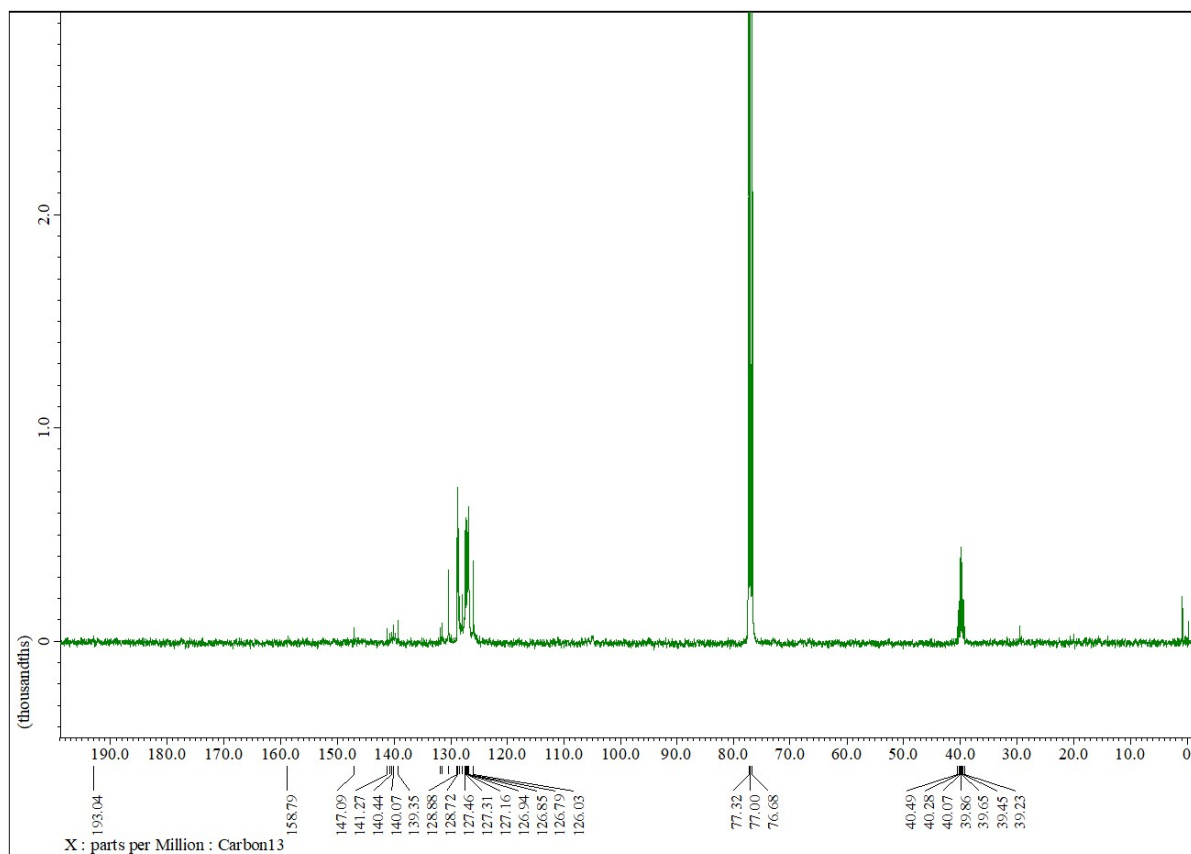

**<sup>1</sup>H NMR and <sup>13</sup>C NMR spectra of 1-(2-chlorophenyl)-2-(3-(2-chlorophenyl)-1H-pyrazol-5-yl)ethane-1,2-dione (3j)**

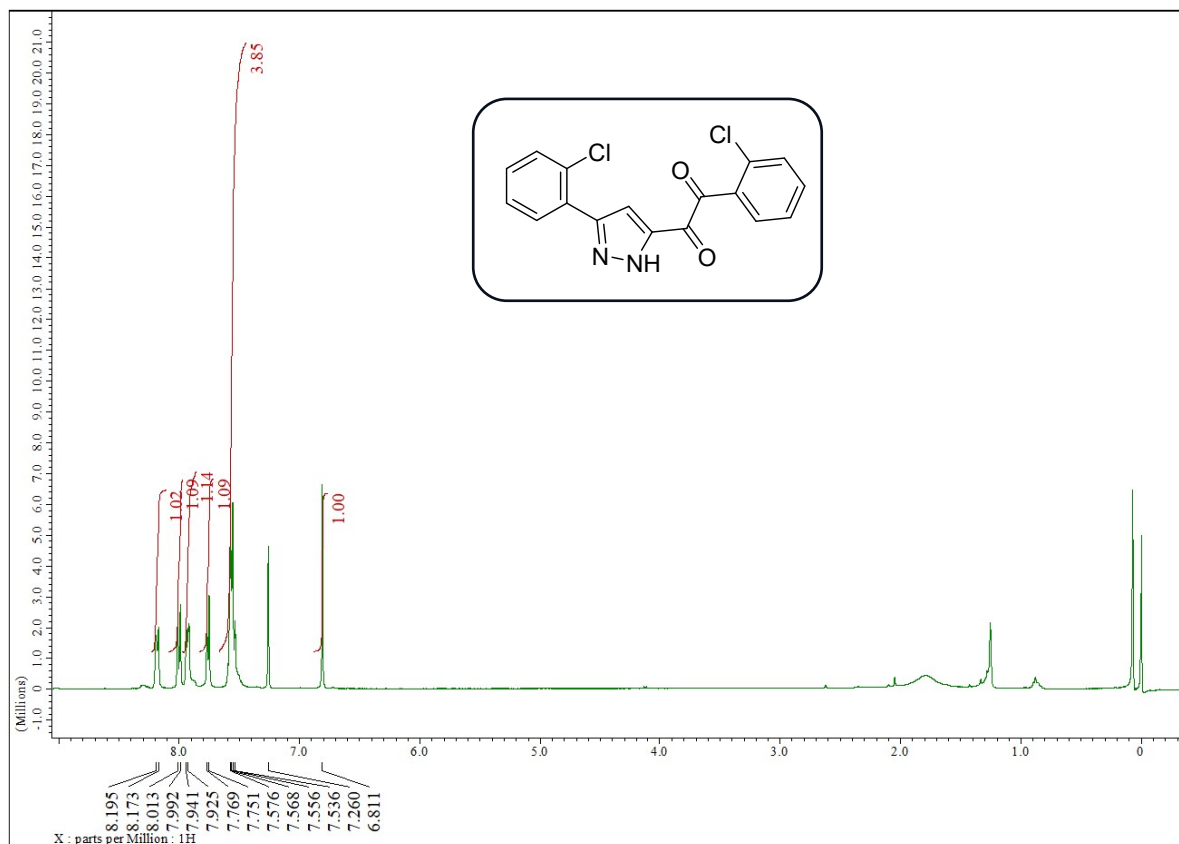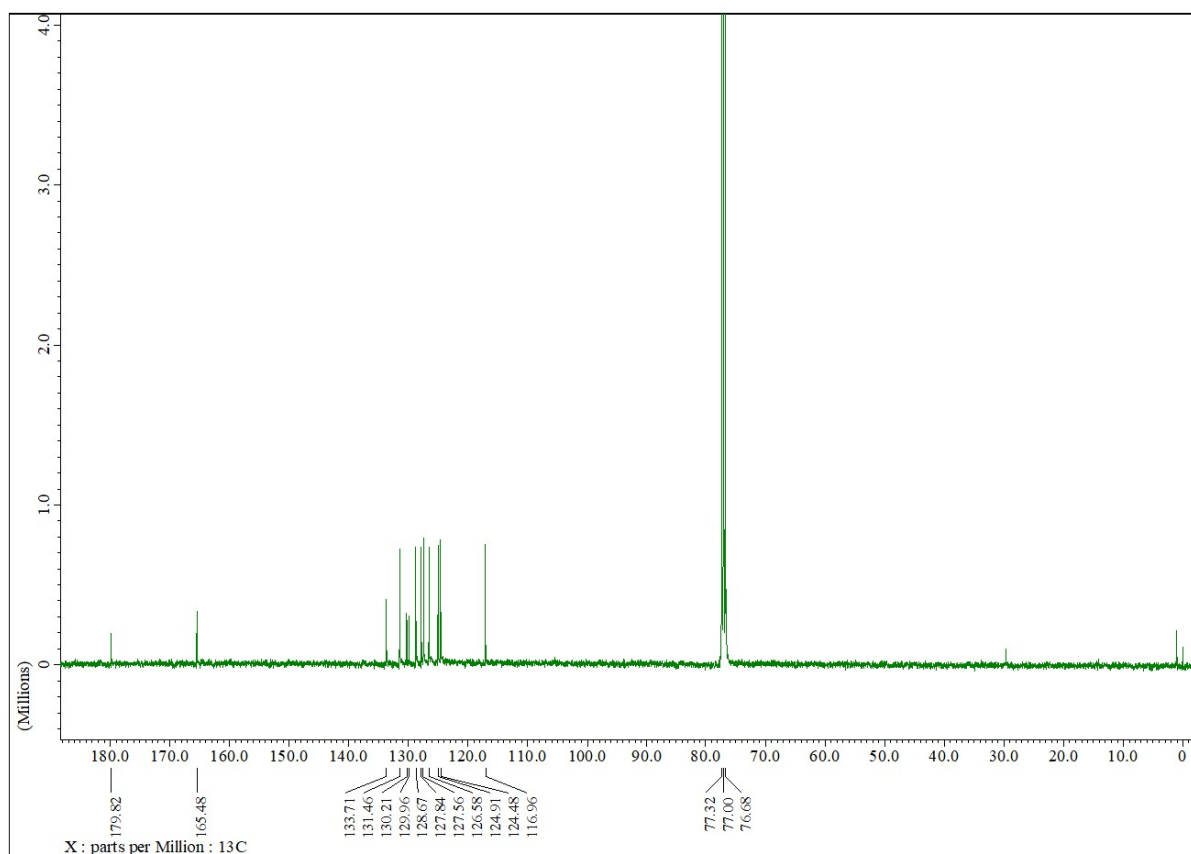



**<sup>1</sup>H NMR and <sup>13</sup>C NMR spectra of 1-(naphthalene-1-yl)-2-(3-(naphthalen-1-yl)-1H-pyrazol-5-yl)ethane-1,2-dione (3k)**

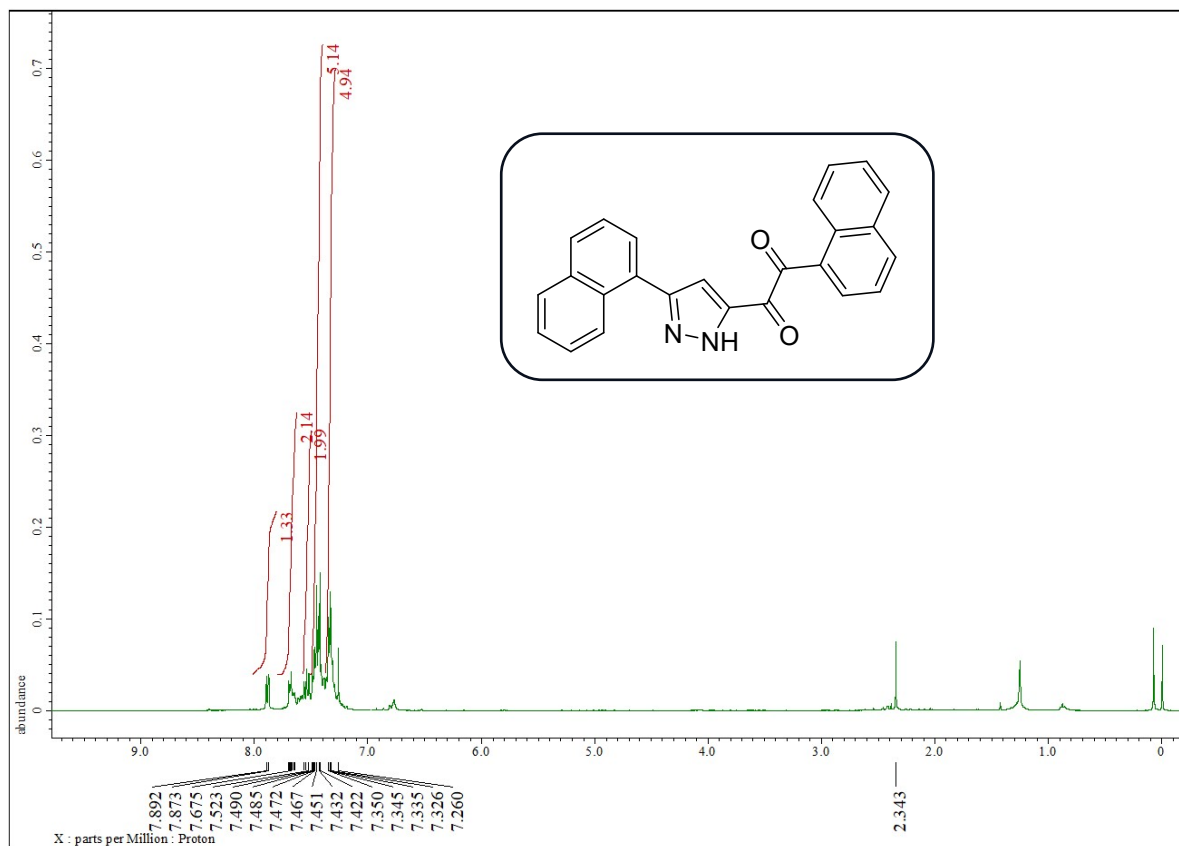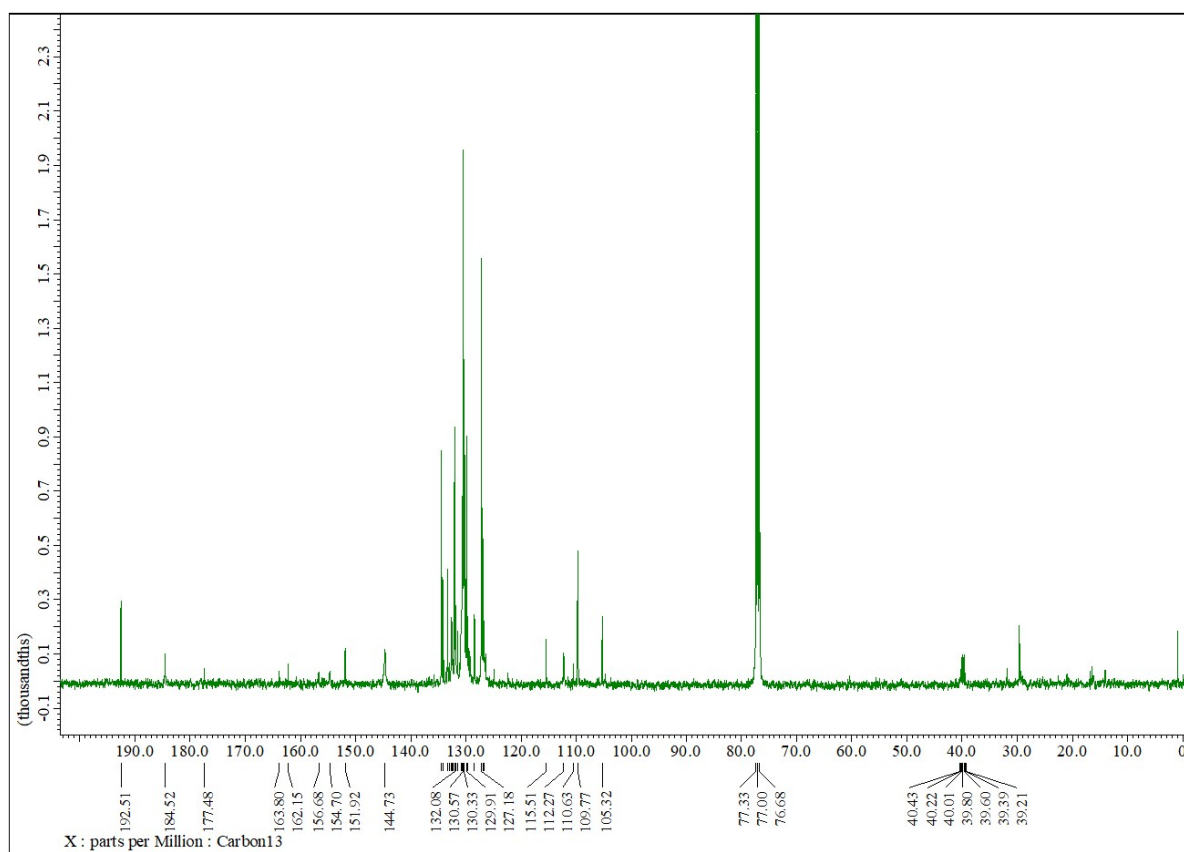

**<sup>1</sup>H NMR and <sup>13</sup>C NMR spectra of 1-(3-bromophenyl)-2-(3-(3-bromophenyl)-1H-pyrazol-5-yl)ethane-1,2-dione (3l)**

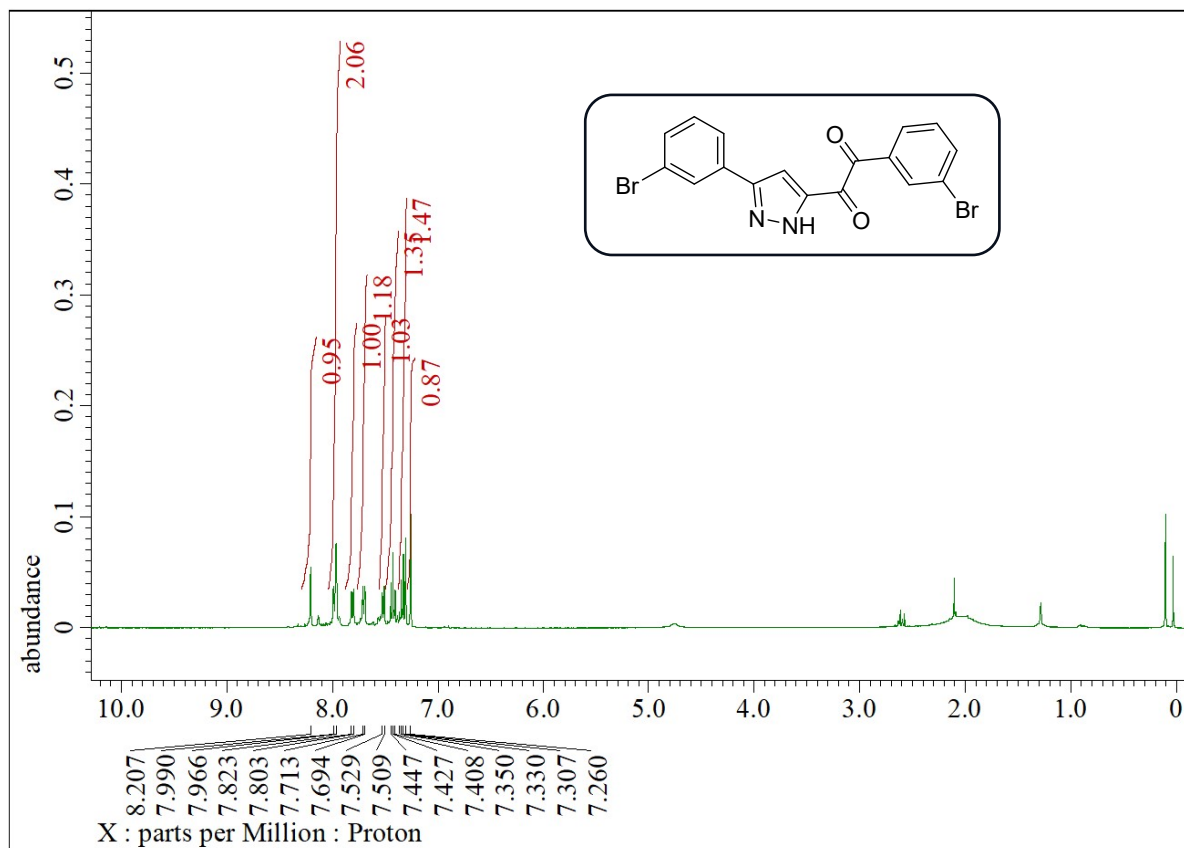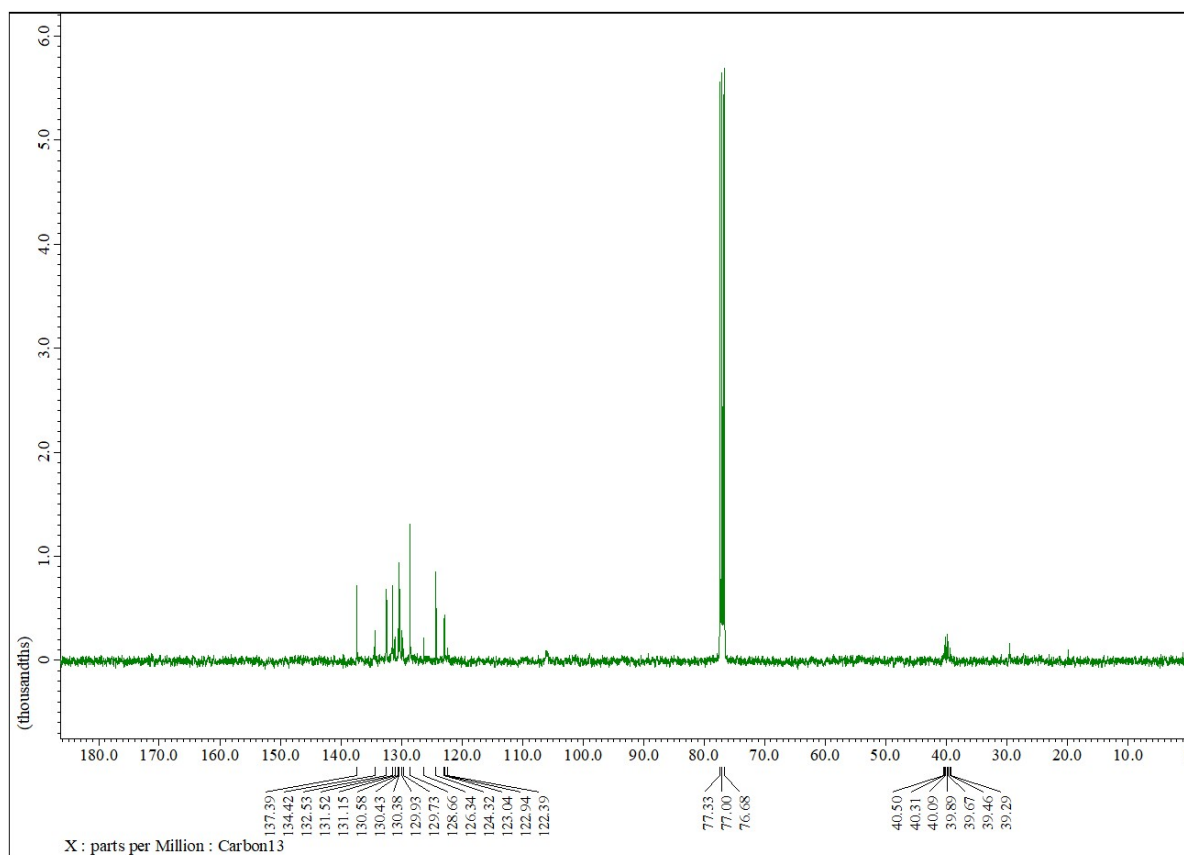

**<sup>1</sup>H NMR and <sup>13</sup>C NMR spectra of 1-(2-methoxyphenyl)-2-(3-(2-methoxyphenyl)-1H-pyrazol-5-yl)ethane-1,2-dione (3m)**

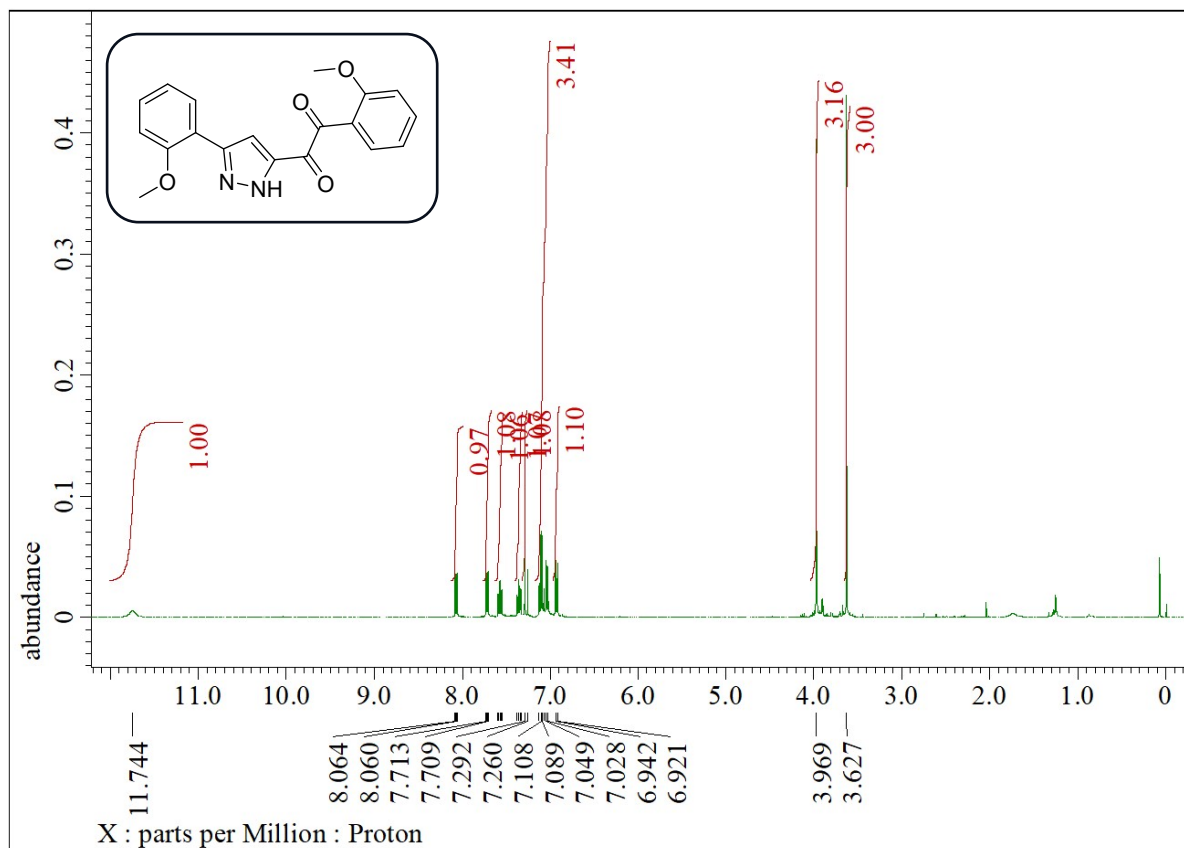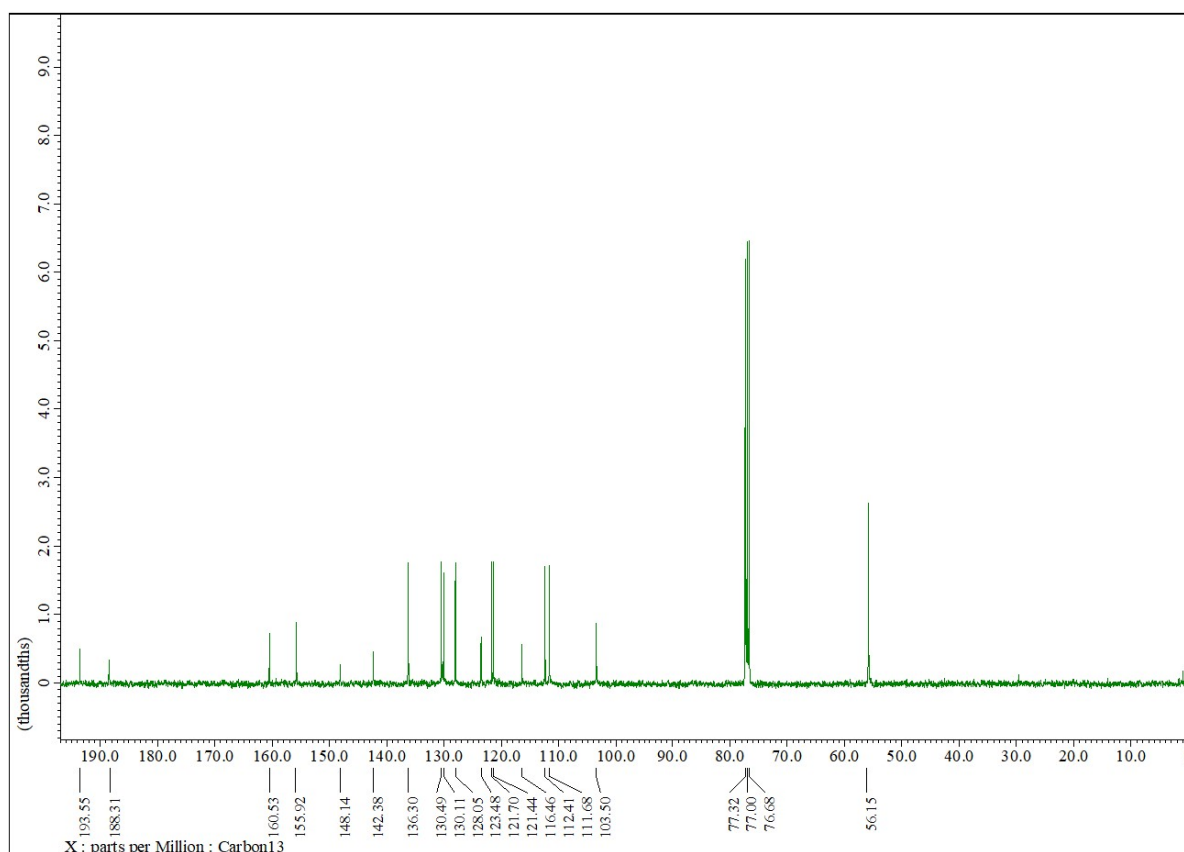

**<sup>1</sup>H NMR and <sup>13</sup>C NMR spectra of 1-(1-phenyl-3-(*p*-tolyl)-1*H*-pyrazol-5-yl)-2-(*p*-tolyl)ethane-1,2-dione (4a)**

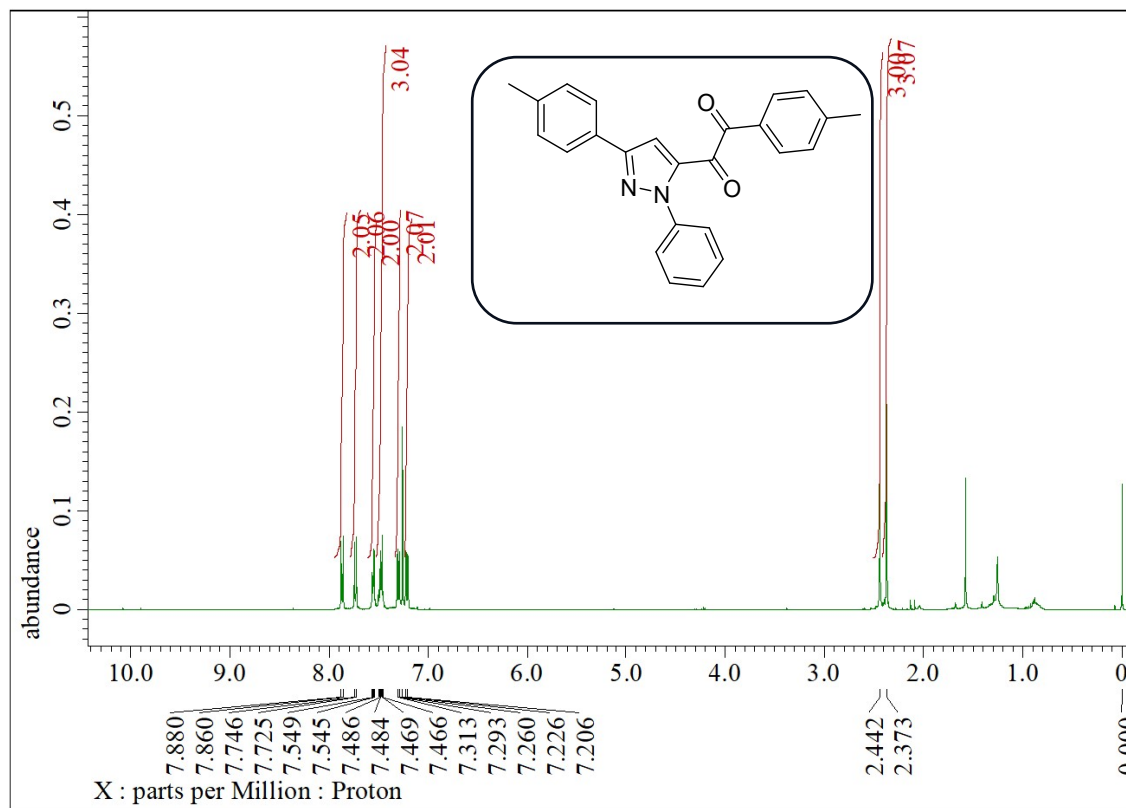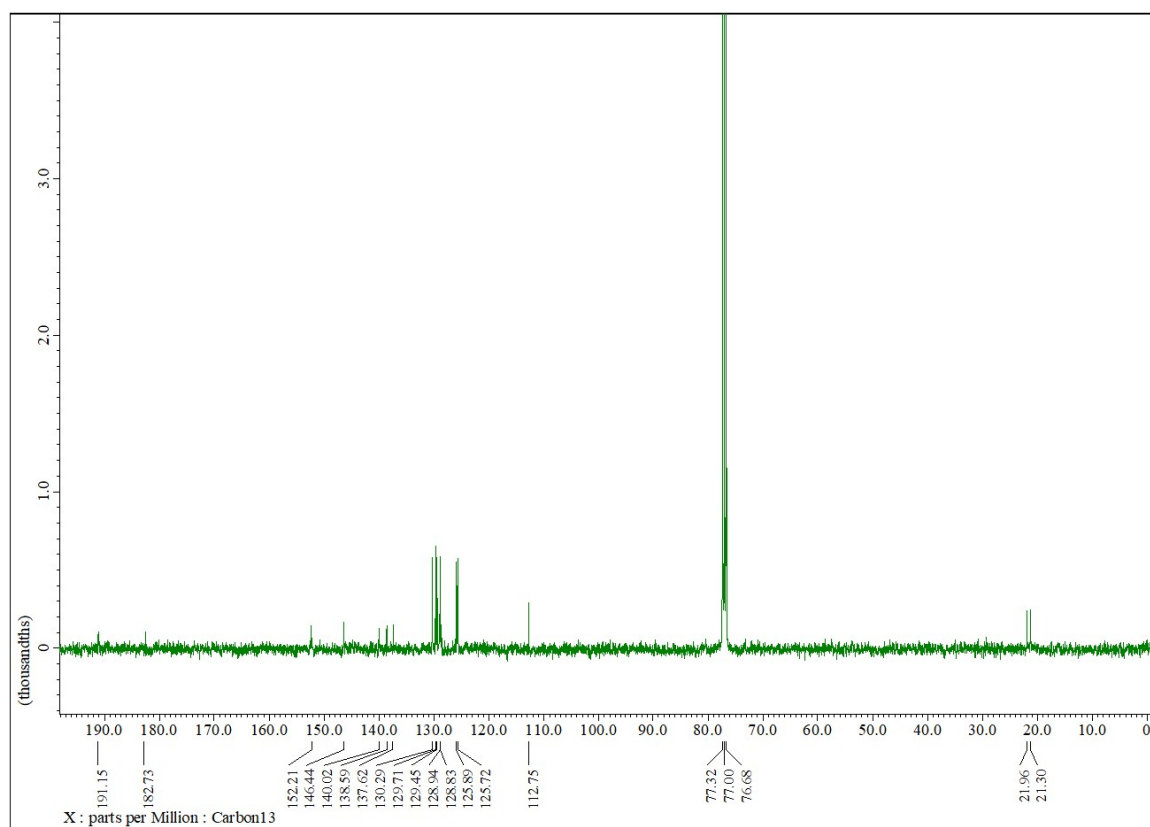

**<sup>1</sup>H NMR and <sup>13</sup>C NMR spectra of 1-(1-phenyl-3-(*p*-chlorophenyl)-1*H*-pyrazol-5-yl)-2-(*p*-chlorophenyl)ethane-1,2-dione (4b)**

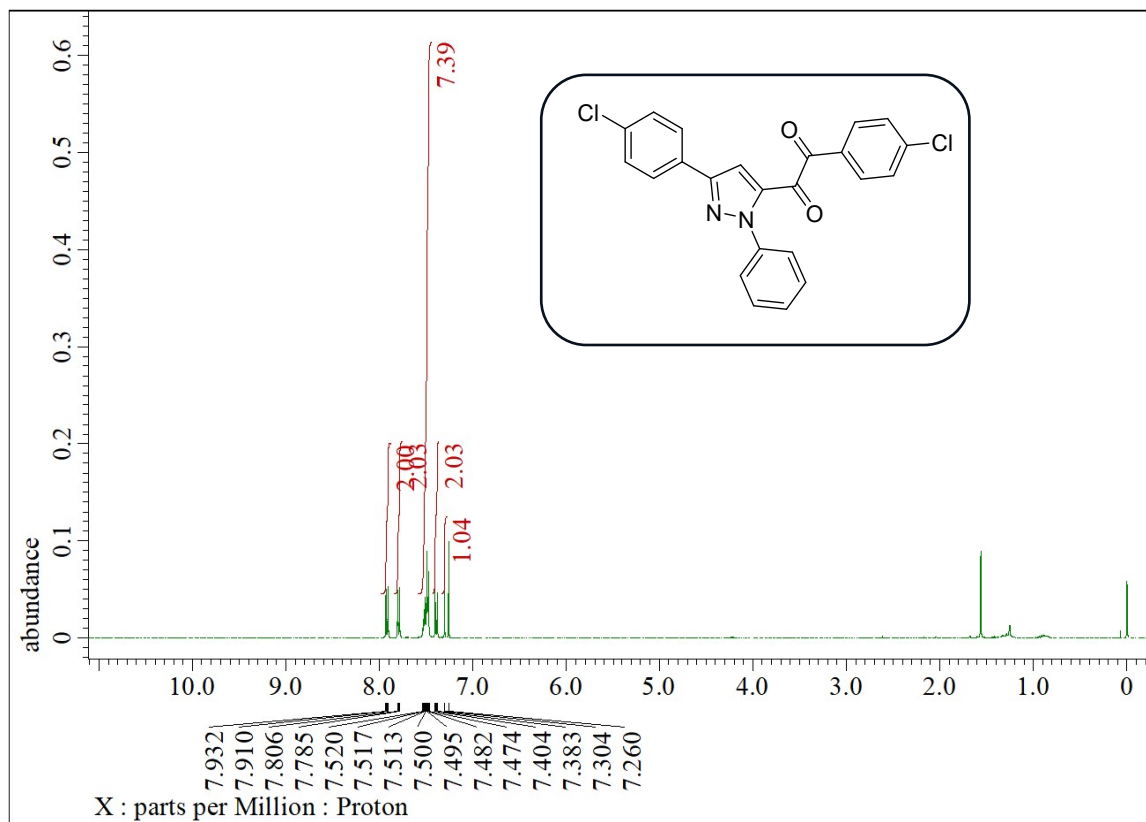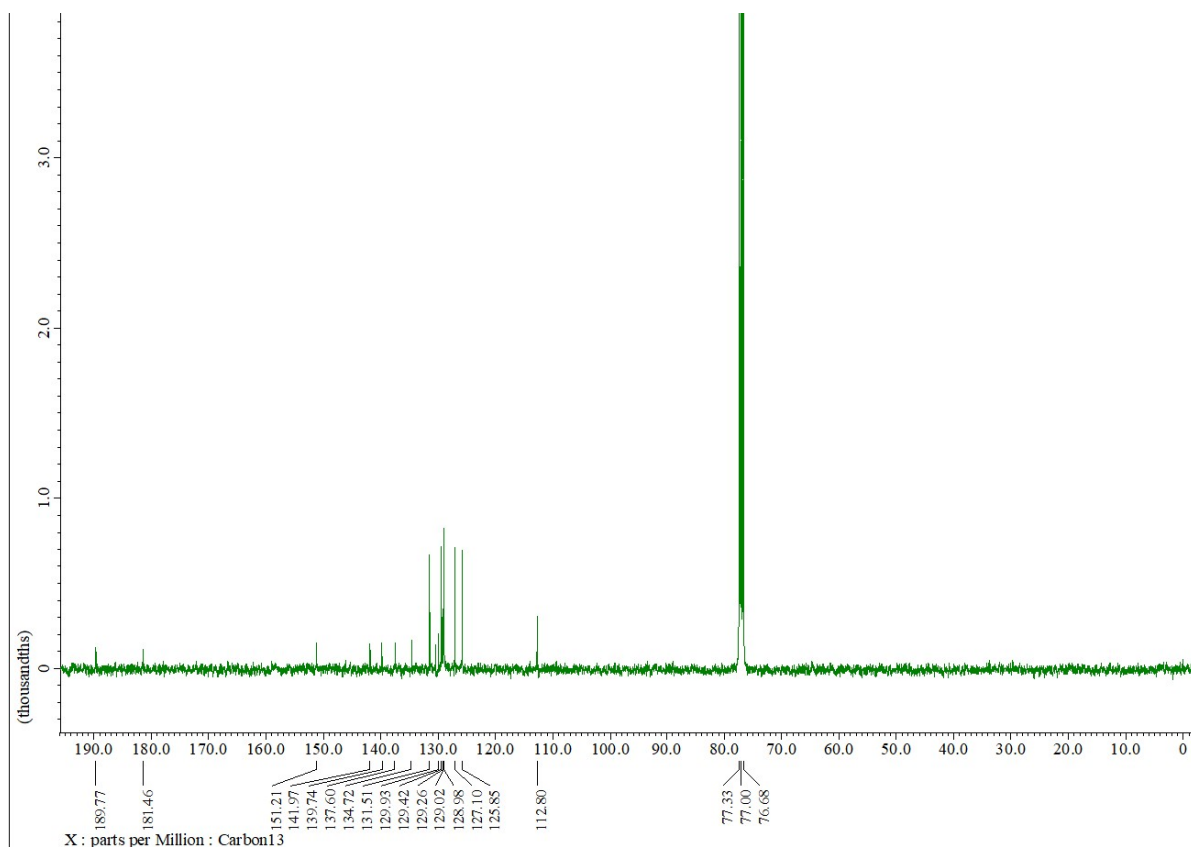

**<sup>1</sup>H NMR and <sup>13</sup>C NMR spectra of 1-(naphthalen-2-yl)-2-(3-naphthalen-2-yl)-1-phenyl-1H-pyrazol-5-yl)ethane-1,2-dione(4c)**

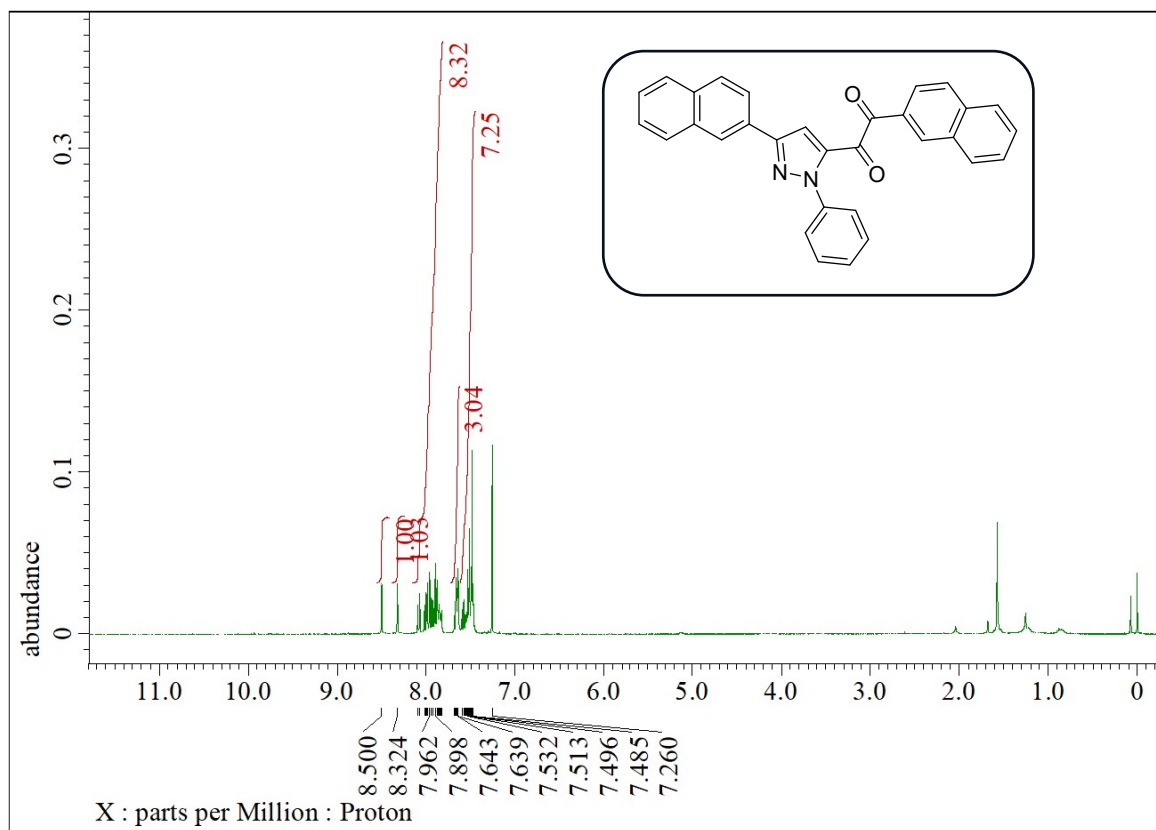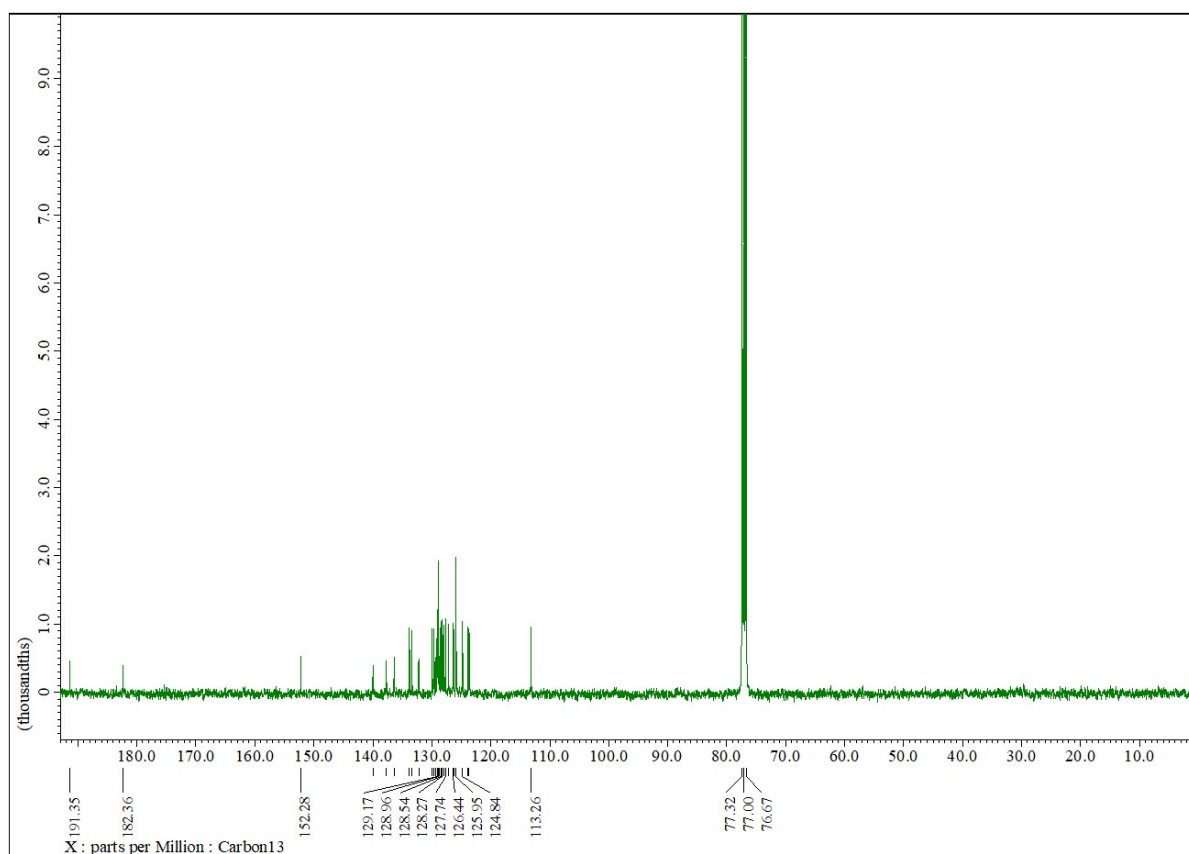

**<sup>1</sup>H NMR and <sup>13</sup>C NMR spectra of 1-([1,1-biphenyl]-4-yl)-2-(3-([1,1-biphenyl]-4-yl)-1-phenyl-1*H*-pyrazol-5-yl)ethane-1,2-dione (4d)**

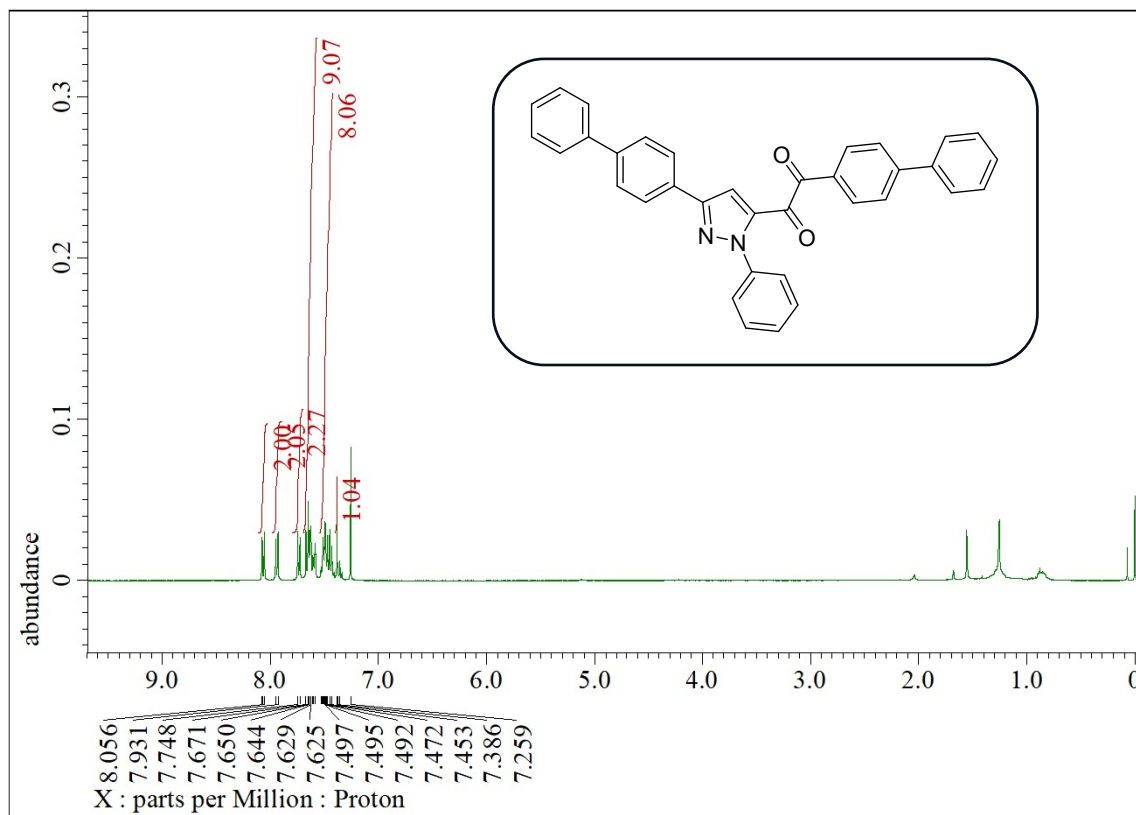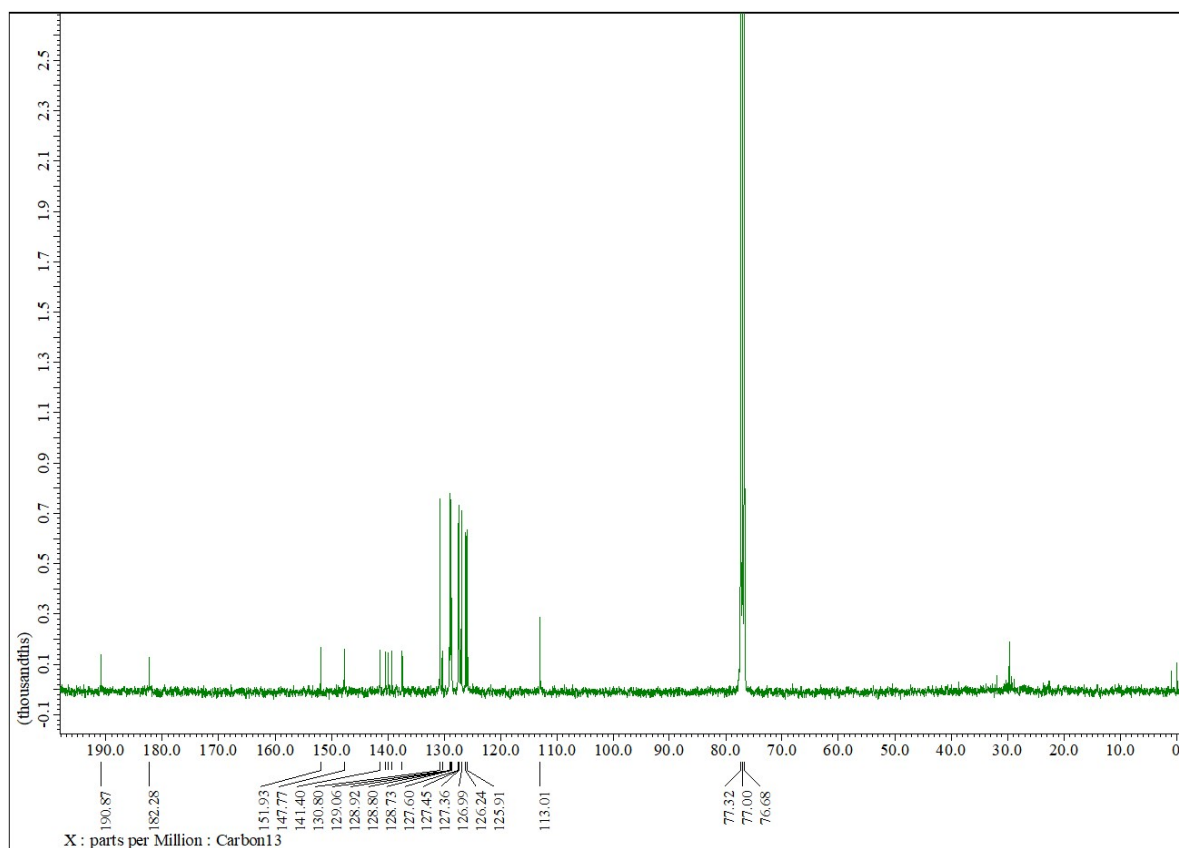

**<sup>1</sup>H NMR and <sup>13</sup>C NMR spectra of 1-(4-chlorophenyl)-2-(3-(4-chlorophenyl)-1-methyl-1H-pyrazol-5-yl)ethane-1,2-dione (4e)**

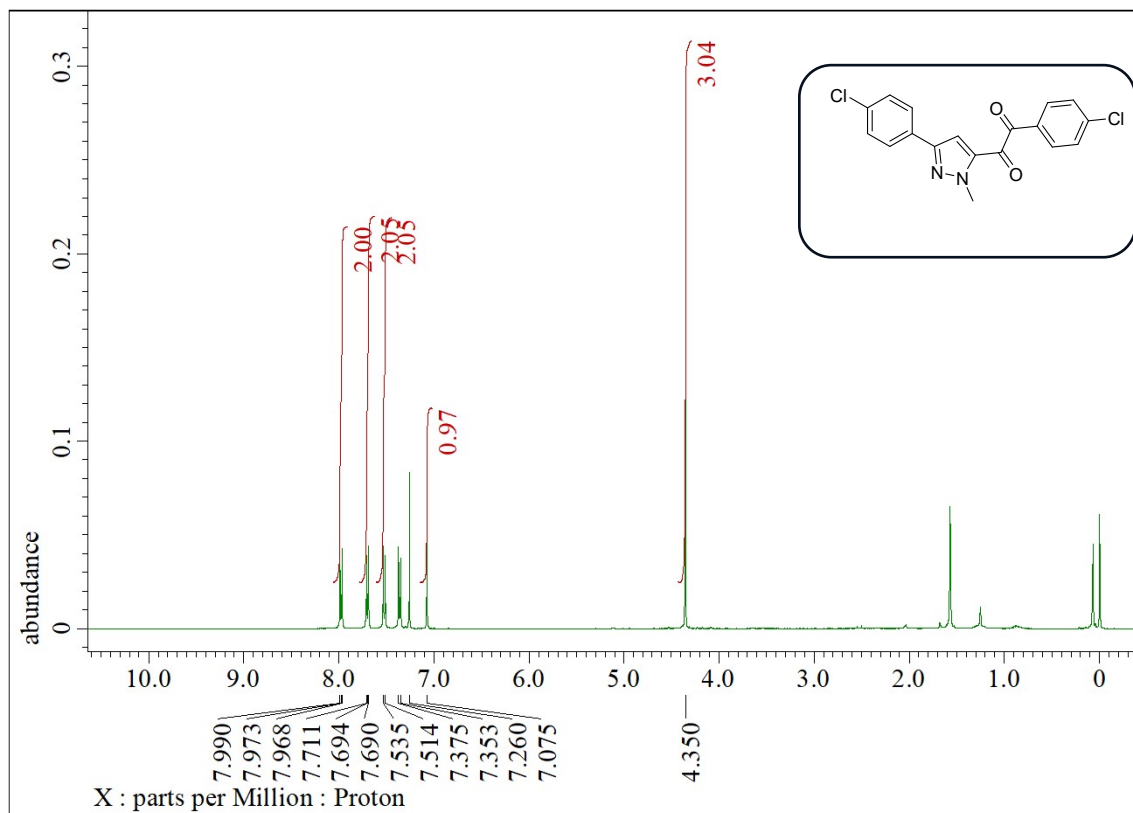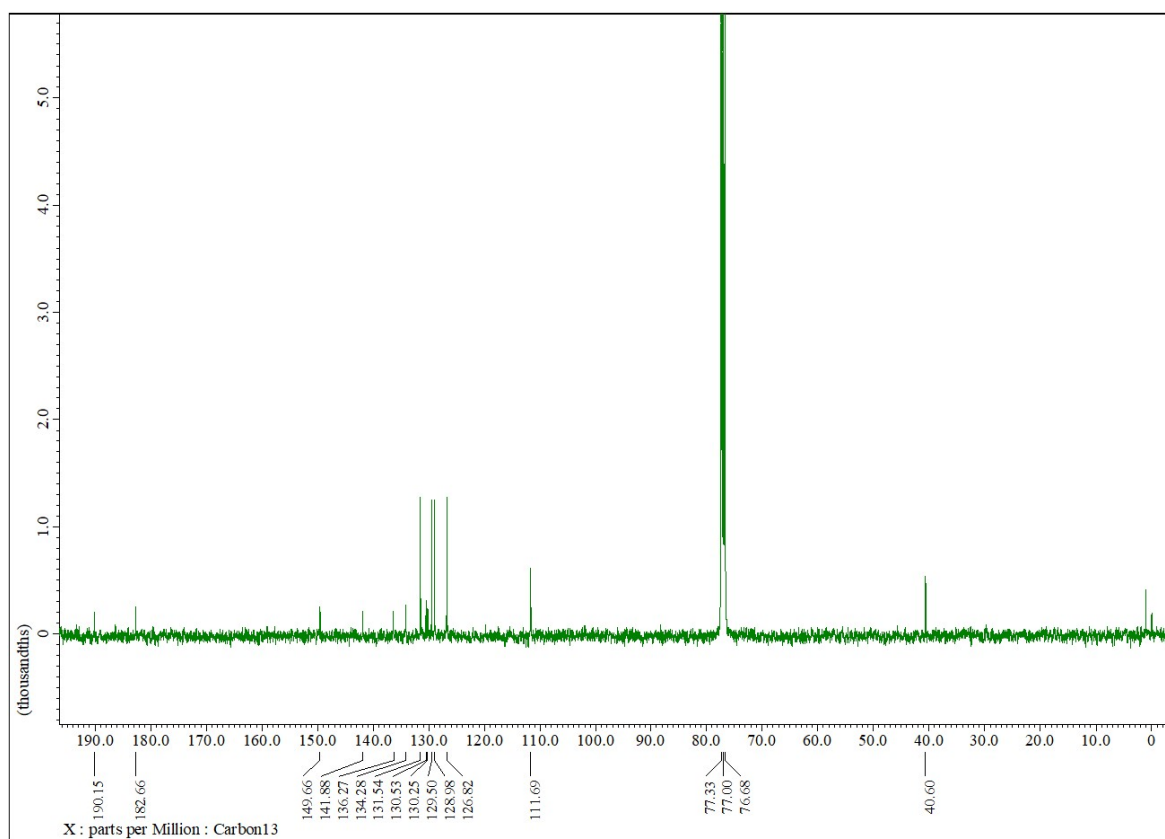



**<sup>1</sup>H NMR and <sup>13</sup>C NMR spectra of 1-(1-methyl-3-(naphthalen-2-yl)-1H-pyrazol-5-yl)-2-(naphthalen-2-yl)ethane-1,2-dione (4f)**

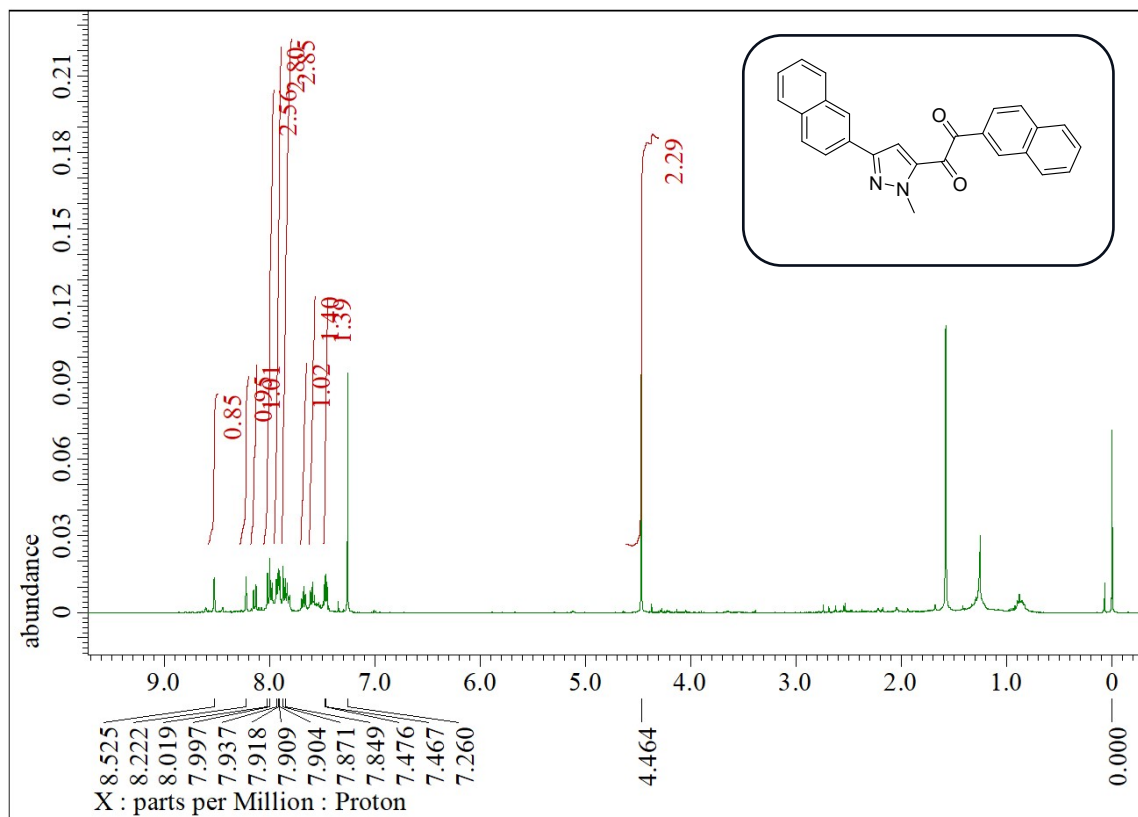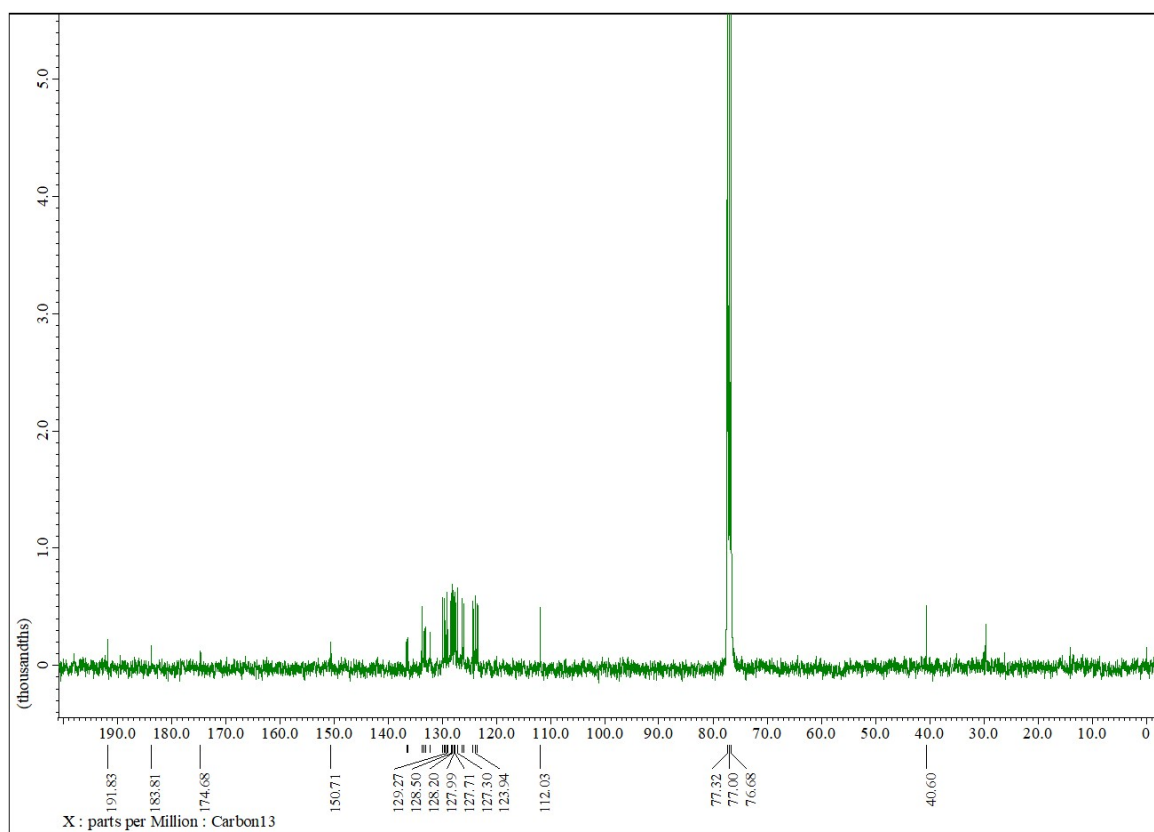

**<sup>1</sup>H NMR and <sup>13</sup>C NMR spectra of 2-phenyl-3-(3-phenyl-1H-pyrazol-5-yl) quinoxaline (5a)**

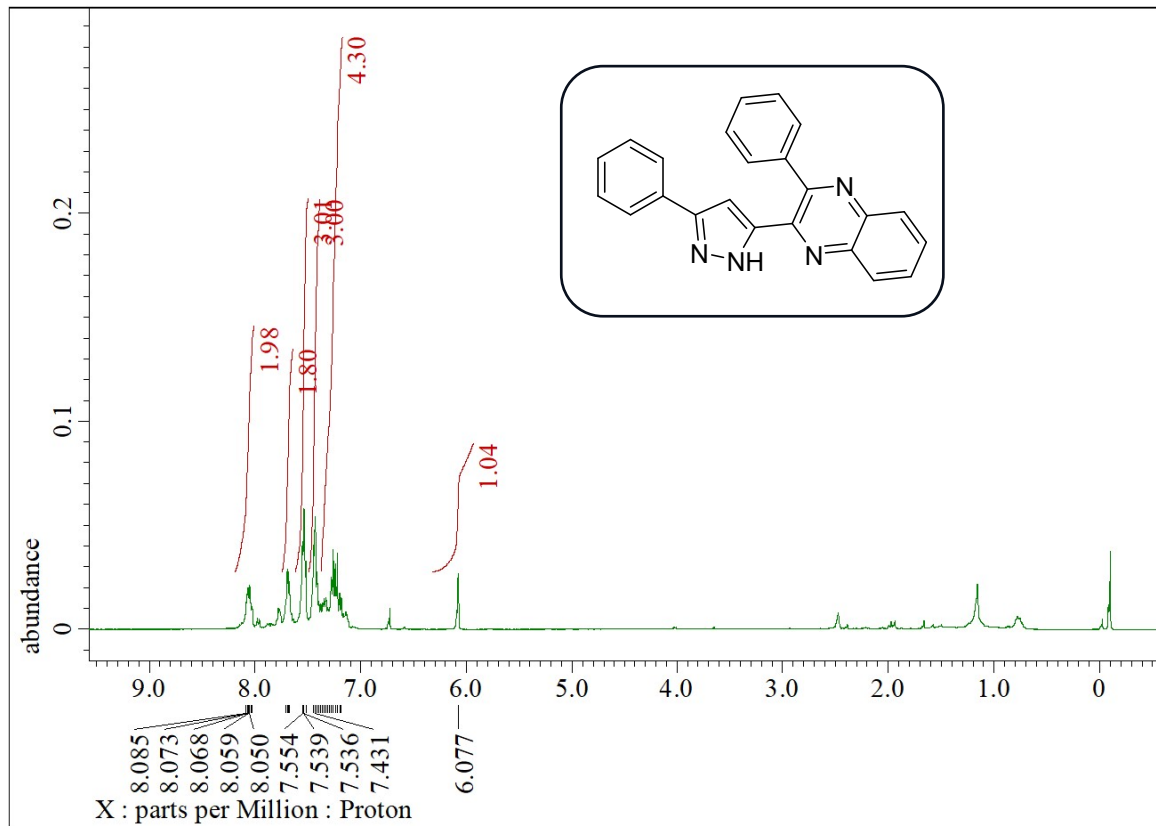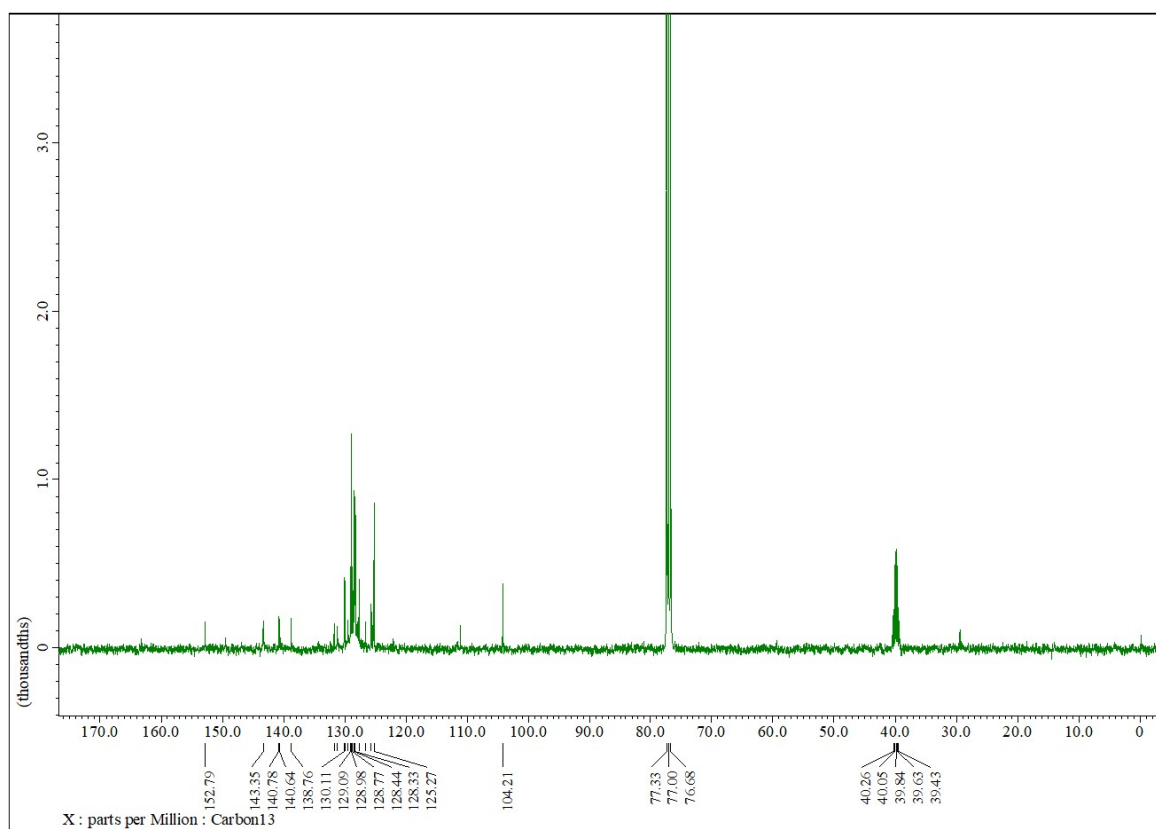

**<sup>1</sup>H NMR and <sup>13</sup>C NMR spectra of 2-(4-bromophenyl)-3-(3-(4-bromophenyl)-1H-pyrazol-5-yl)quinoxaline (5b)**

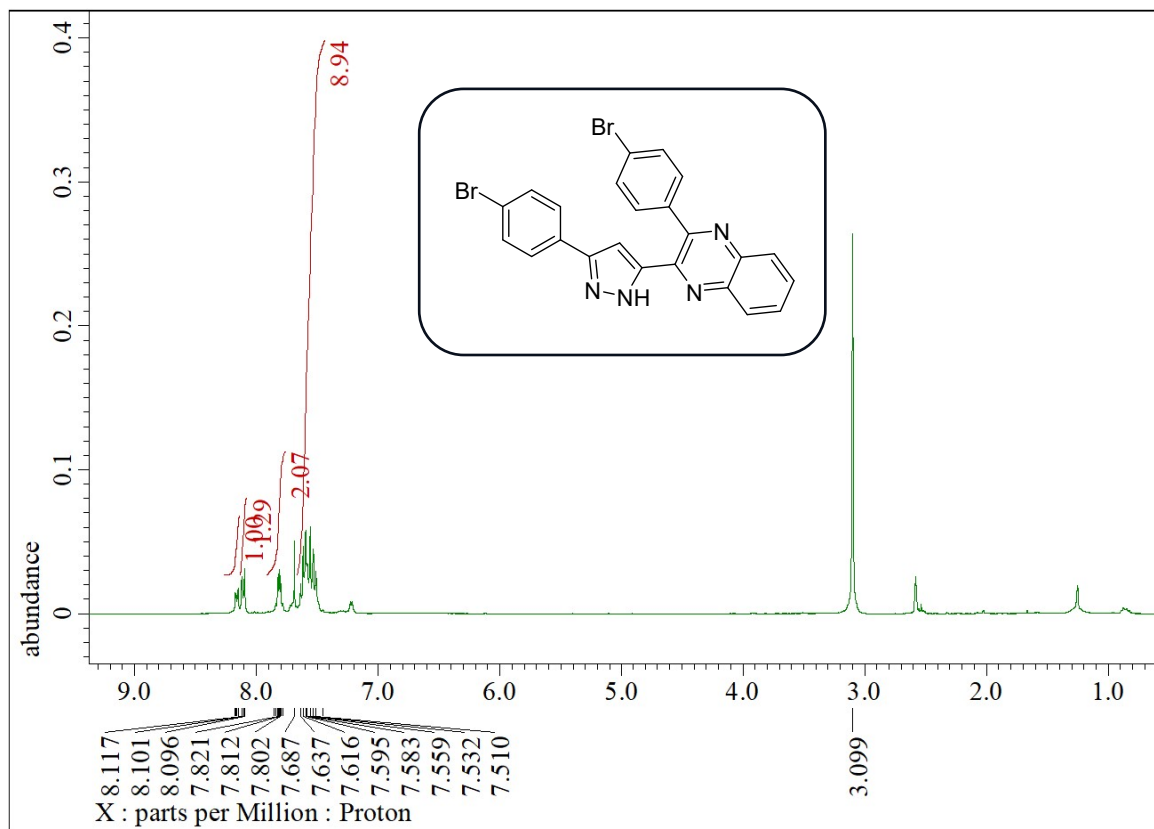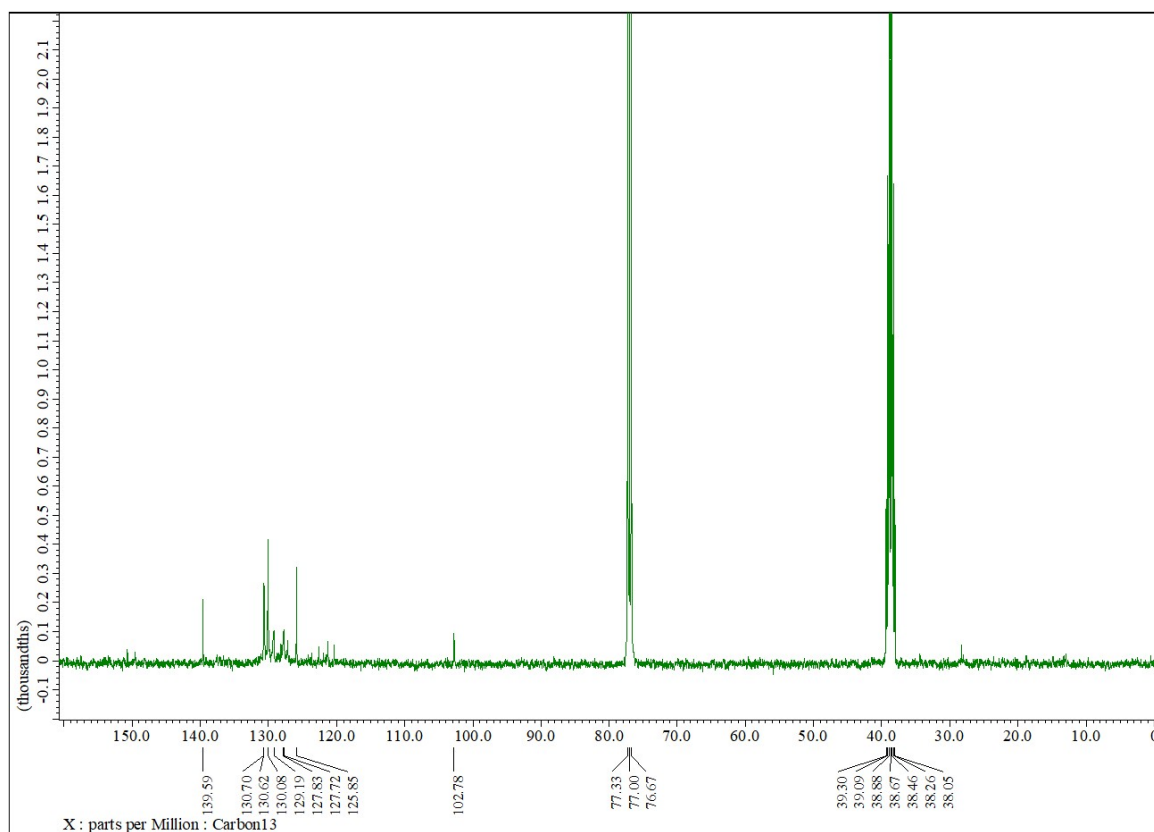

<sup>1</sup>H NMR and <sup>13</sup>C NMR spectra of 2-(p-tolyl)-3-(3-(p-tolyl)-1H-pyrazol-5-yl)quinoxaline

(5c)

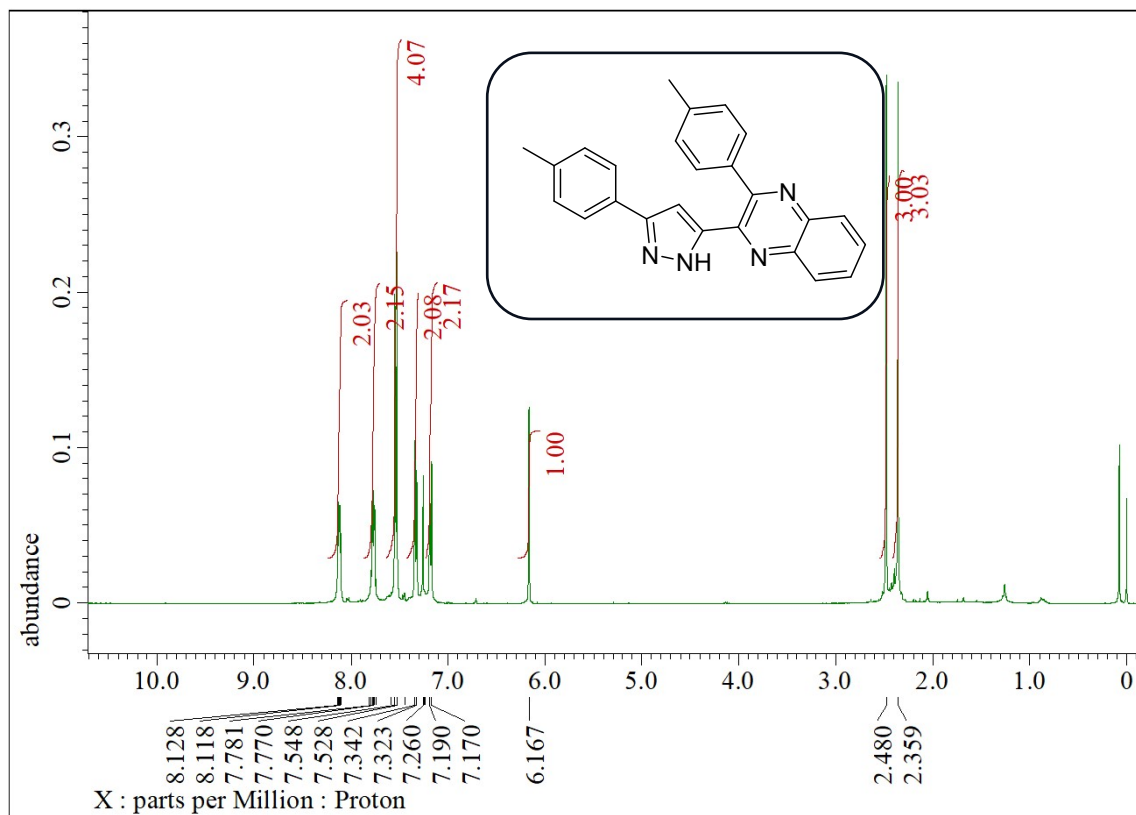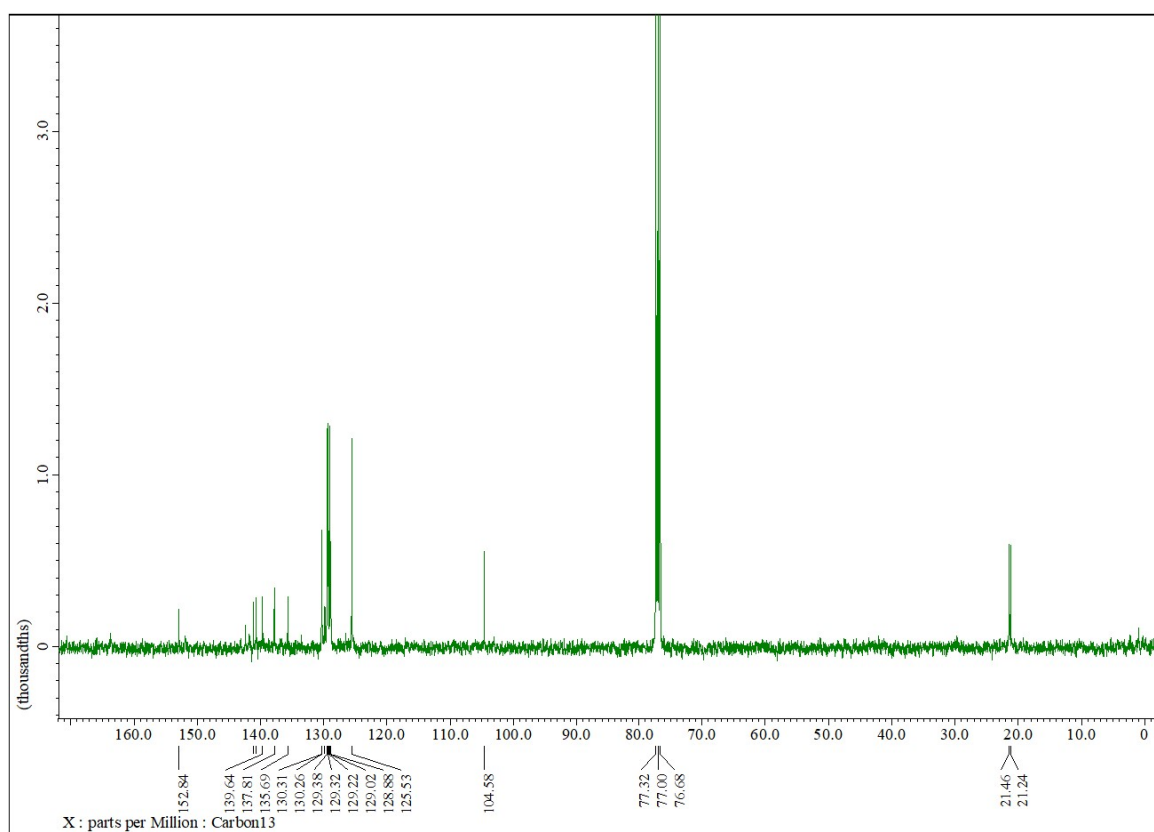

**<sup>1</sup>H NMR and <sup>13</sup>C NMR spectra of 2-(4-chlorophenyl)-3-(3-(4-chlorophenyl)-1*H*-pyrazol-5-yl)quinoxaline (5d)**

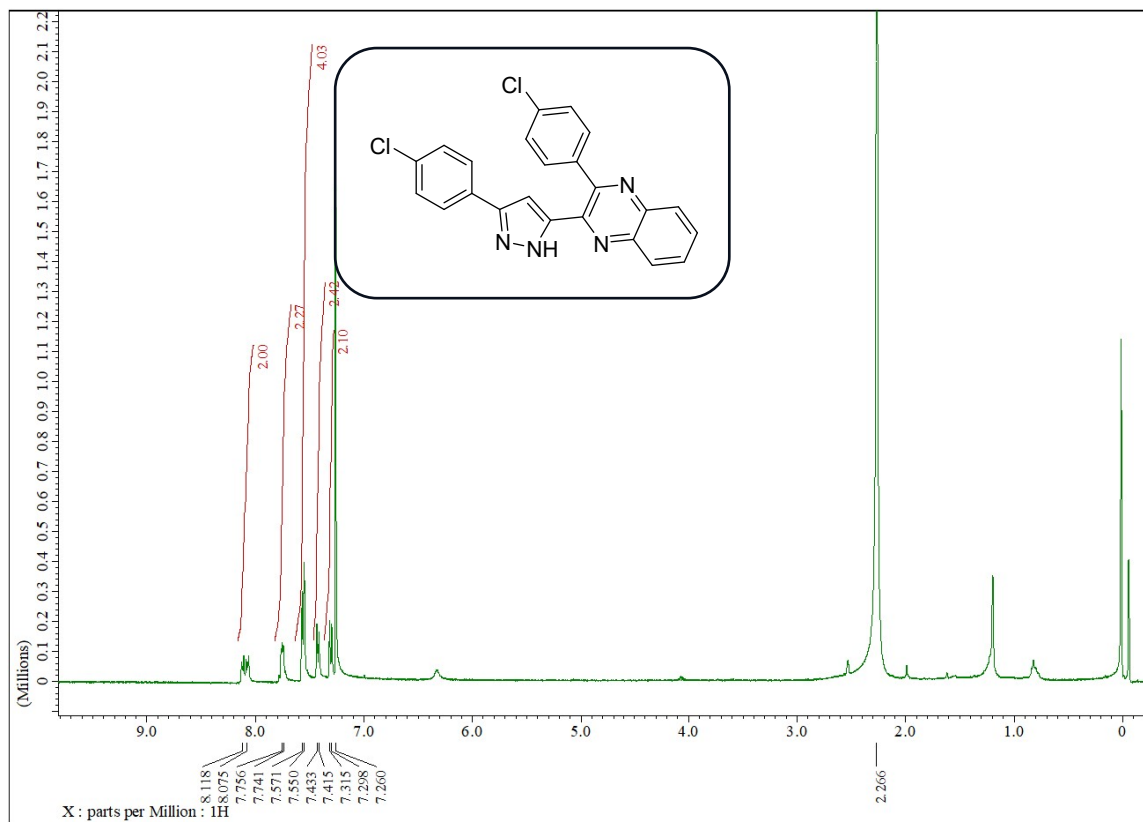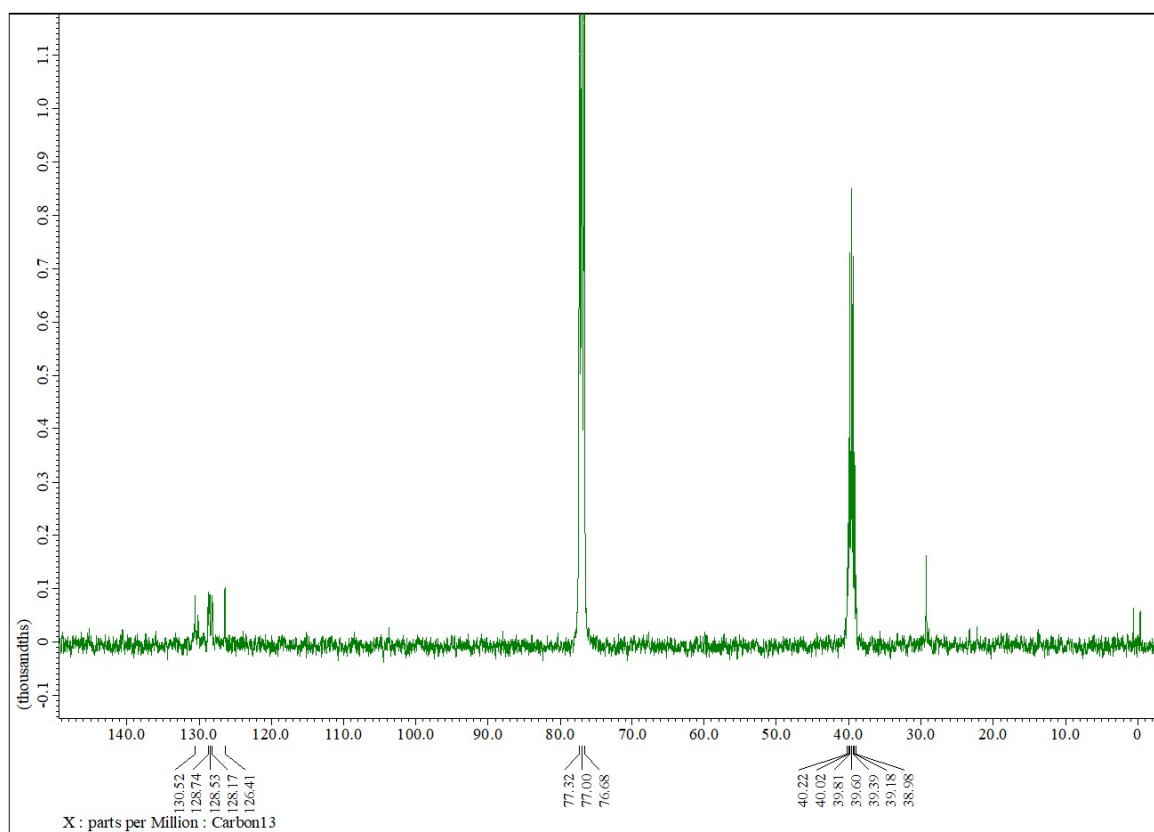

**<sup>1</sup>H NMR and <sup>13</sup>C NMR spectra of 2-(furan-2-yl)-3-(3-(furan-2-yl)-1H-pyrazol-5-yl)quinoxaline (5e)**

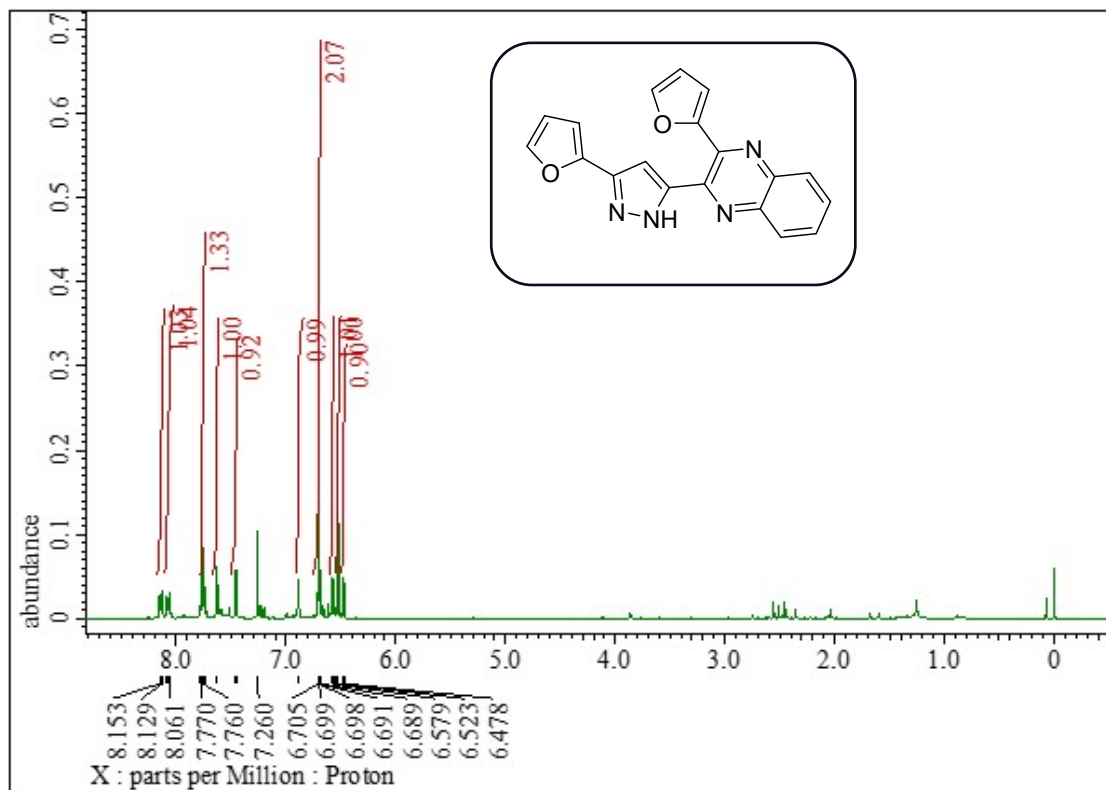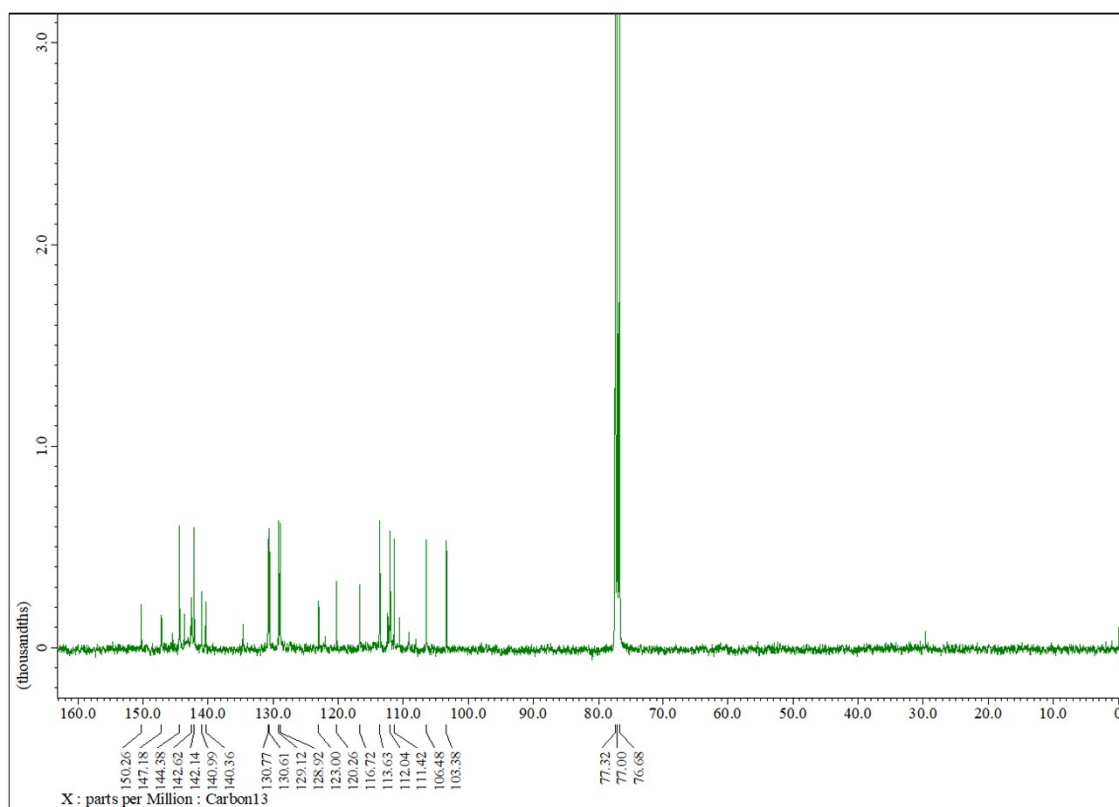

**<sup>1</sup>H NMR and <sup>13</sup>C NMR spectra of 2-(3-bromophenyl)-3-(3-(3-bromophenyl)-1H-pyrazol-5-yl)quinoxaline (5f)**

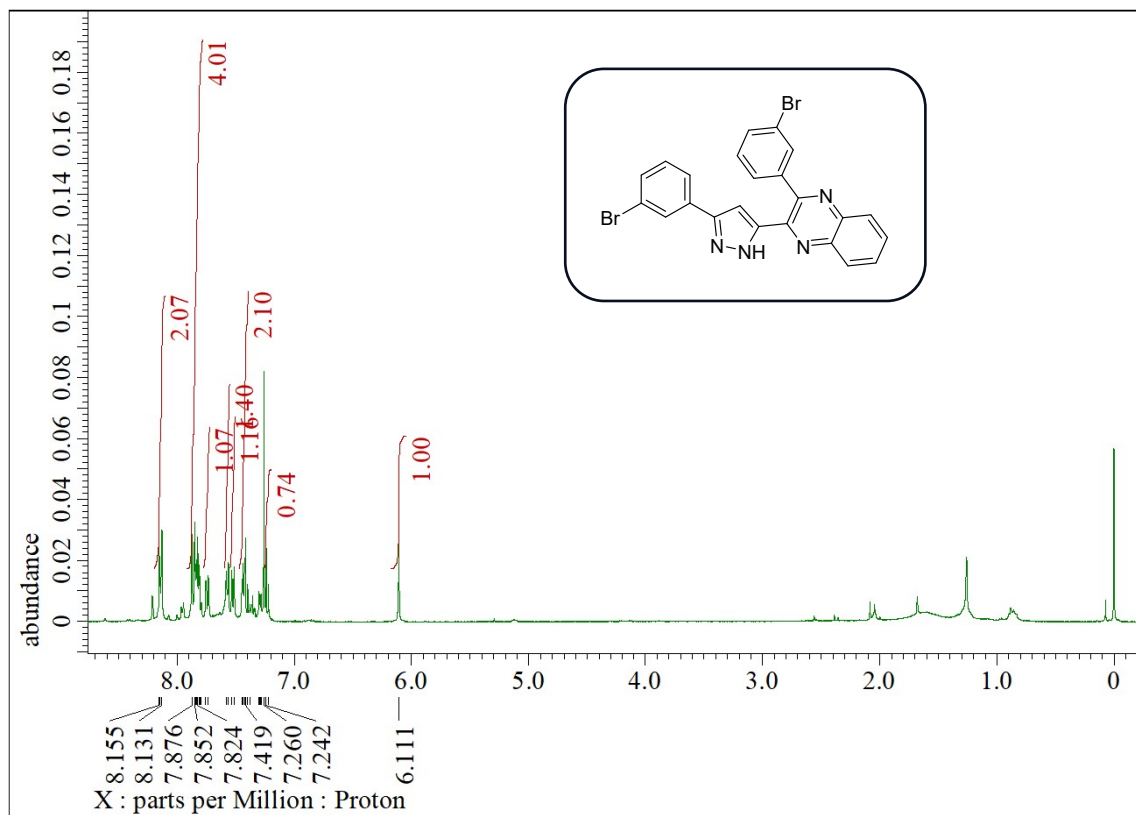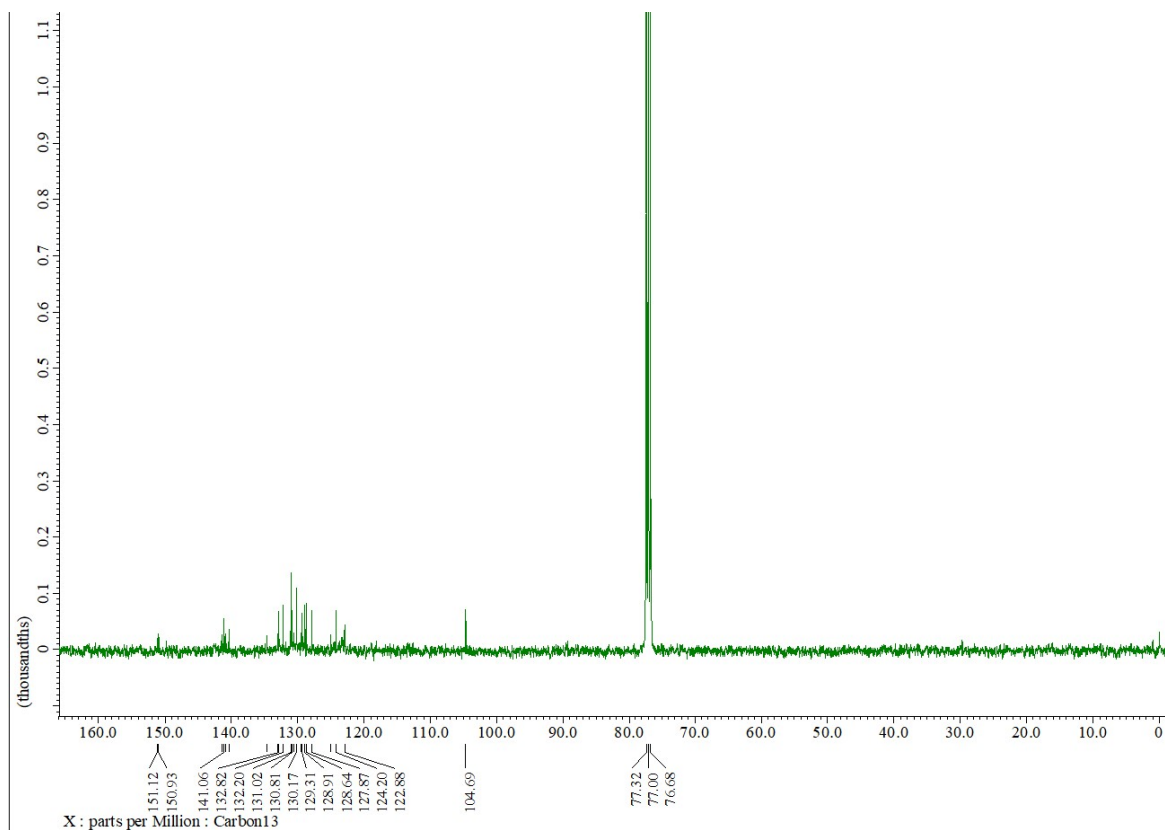

Supplement: d3ob01997g1.pdf [file d3ob01997g1.pdf]
